# Supplementary material for: F11R Is a Novel Monocyte Prognostic Biomarker for Malignant Glioma
Source: PLoS One. 2013 Oct 11;8(10):e77571. doi: 10.1371/journal.pone.0077571 (PMC3795683; doi:10.1371/journal.pone.0077571)
Supplement: Table S5 — RNA-seq and microarray platforms were analyzed two ways each, with Cufflinks and ALEXA-Seq, and with Aroma and Partek, respectively. The analyses were merged by filtering for transcripts that were significantly differentially expressed in three out of the four methods, and then were ranked by average fold change rank across the four methods. (XLS) [file pone.0077571.s010.xls]

## Sheet: Significant q in 3-4 methods
Table S5. RNA-seq and microarray platforms were analyzed two ways each, with Cufflinks and ALEXA-Seq, and with Aroma and Partek, respectively. The analyses were merged by filtering for transcripts that were significantly differentially expressed in three out of the four methods, and then were ranked by average fold change rank across the four methods.
Gene Name	Entrez ID	Alexa q-value	Cuffdiff q-value	Aroma q-value	Partek q-value	Alexa log2 ratio	Cuffdiff log2 ratio	Aroma log2 ratio	Partek log2 ratio	Alexa fold change	Cuffdiff fold change	Aroma fold change	Partek fold change	Alexa fold change rank	Cuffdiff fold change rank	Aroma fold change rank	Partek fold change rank	Fold change rank mean	Upregulated in
S100A6	20200	0.0346965	0.0623495	0.00208877	0.00138106	14.4186	12.0493	7.41226	10.0342	21898.3	4237.36	169.338	1047.58	9	25	8	1	10.75	monocyte
NAV3	260315	0.00887311	6.41004e-13	0.000557781		0.000202657	0.00025228	0.0188726		-7118.42	-5718.12	-75.9451		33	12	47		30.6667	microglia
MGST1	56615	0.136102	0.000933241	0.000335806	0.000408885	13.4621	12.3582	7.23389	7.98516	11283.7	5249.37	149.529	252.381	21	16	9	79	31.25	monocyte
CHI3L3	12655	0.0681384	0	8.00105e-07	5.15914e-05	12.5368	10.5287	8.49967	9.24346	5941.15	1476.24	360.956	605.122	48	76	2	4	32.5	monocyte
MPO	17523	0.56029	0	0.0170029	0.0167968	14.6849	11.8193	7.16005	7.89706	26338	3612.89	142.017	237.371	7	31	12	84	33.5	monocyte
SELL	20343	0.0118117	0	0.000426579	0.000465389	13.4488	11.8315	6.74728	8.15526	11180.2	3643.55	106.432	284.088	22	30	27	69	37	monocyte
SPARC	20692	0.0541932	0	5.95501e-05	3.50124e-05	0.000865274	0.000383861	0.0103384	0.002359	-1666.83	-3757.88	-139.048	-611.07	142	29	14	2	46.75	microglia
SLCO2B1	101488	0.0182214	0	0.000358338	2.19882e-05	9.20935e-05	0.000135725	0.0152646	0.0091962	-15665.1	-10629.1	-94.0136	-156.38	14	6	32	144	49	microglia
SALL1	58198	0.0402341	0.38411	0.000314823	0.000193329	6.66209e-05	0.000140818	0.0211864	0.00832917	-21654.8	-10244.6	-67.5966	-172.71	10	7	51	135	50.75	microglia
FN1	14268	0.00353658	0	4.64827e-05	1.28629e-05	12.0307	11.3472	7.66952	7.79055	4183.18	2604.2	202.59	220.406	67	42	6	90	51.25	monocyte
FCRLS	80891	0.0346965	3.07671e-09	0.000303177	3.49496e-05	0.000418307	0.000562346	0.00804089	0.00520268	-3448.39	-2564.99	-178.92	-276.799	85	45	7	71	52	microglia
PMP22	18858	0.0213832	0	0.00162629	0.00353397	0.000114812	7.54785e-05	0.0247518	0.00800633	-12565.2	-19113.5	-57.7878	-179.695	18	3	63	125	52.25	microglia
ATP8B4	241633	0.0304794	0	0.00064897		12.5811	10.5745	5.82569		6126.77	1523.91	55.7161		46	72	70		62.6667	monocyte
HP	15439	0.0509863	2.61407e-08	0.000580822	0.000334908	11.1142	9.43155	6.62541	9.09523	2215.65	689.523	97.7295	545.938	117	149	31	5	75.5	monocyte
S100A9	20202	0.82503	2.6839e-08	0.00157971	0.00136507	12.6177	9.39662	6.28898	7.49346	6283.96	673.008	77.1936	179.2	44	153	46	129	93	monocyte
MMP8	17394	0.00497418	3.09592e-09	0.00339702	0.00410439	12.1199	9.46724	6.36532	7.08833	4450.02	706.822	81.4426	135.082	64	145	41	158	102	monocyte
CXCR4	12767	0.103595	0	0.00270039	0.000949441	11.7666	9.16783	5.77693	7.67922	3483.26	574.164	53.8313	203.963	84	181	74	110	112.25	monocyte
SIGLECH	233274	0.00210429	0	0.000230369	3.72095e-05	0.00214981	0.00073864	0.0107725	0.00558566	-670.582	-1952.68	-133.424	-257.786	314	56	15	76	115.25	microglia
P2RY12	70839	0.0419854	2.4248e-12	0.00164118	4.62953e-05	0.00135229	0.000709694	0.0171058	0.0122665	-1066.35	-2032.34	-83.8405	-117.114	210	54	38	169	117.75	microglia
CD24A	12484	0.409621	6.40714e-08	0.0040818	0.00195211	11.2996	8.86569	6.32894	7.53581	2519.65	465.486	79.3898	184.569	105	233	42	120	125	monocyte
GM5150	381484	0.0401066	0.276196	0.00880143	0.00655092	11.8773	9.71183	4.67237	6.94881	3760.93	837.595	24.499	122.538	75	132	173	167	136.75	monocyte
EMB	13723	0.0419544	5.61938e-11	0.000608913	7.74742e-06	10.4462	8.40341	7.71355	8.07283	1394.19	337.593	208.898	268.255	166	310	5	72	138.25	monocyte
PLXDC2	67448	0.0144289	0	0.00130534	0.000922466	0.00197657	0.00152918	0.0122925	0.00832778	-729.397	-942.944	-116.864	-172.739	289	117	20	132	139.5	microglia
C1QB	12260	0.173108	7.49705e-08	0.000152512	2.68145e-05	0.00318467	0.000694782	0.0117659	0.00550814	-452.513	-2075.97	-122.117	-261.421	418	52	16	74	140	microglia
HPGDS	54486	0.0453654	2.83623e-07	0.00167271	0.000689051	0.00227483	0.00100647	0.0119768	0.00833894	-633.7	-1432.92	-119.959	-172.507	327	79	18	136	140	microglia
MERTK	17289	0.0247506	1.03972e-13	1.27905e-05	2.92878e-07	0.00276508	0.00142795	0.0102779	0.00543667	-521.255	-1009.82	-139.87	-264.864	376	112	13	73	143.5	microglia
S100A4	20198	0.0517046	0	0.000331394	0.000103488	11.1482	8.60613	6.7195	6.86455	2268.51	388.676	104.383	115.529	113	273	28	170	146	monocyte
F11R	16456	0.0386261	1.55431e-12	8.61252e-05	6.2084e-06	0.00306464	0.00117565	0.00991735	0.00943482	-470.255	-1226.64	-144.972	-152.412	406	94	11	147	164.5	microglia
HIST1H1B	56702	0.305871	1.5594e-05	0.00572617	0.00196654	10.9189	7.89807	6.41018	8.03457	1935.11	237.536	84.0468	261.209	125	429	37	75	166.5	monocyte
UBE2C	68612	0.0949896	4.36356e-07	0.00252308	0.00127414	9.22958	9.54443	5.80212	7.50377	599.316	745.722	54.7972	180.493	342	141	72	122	169.25	monocyte
OLFML3	99543	0.0258277	2.38787e-13	0.00129314	0.00191181	0.00374366	0.000938403	0.0127978	0.00763434	-384.871	-1536.89	-112.23	-188.475	480	71	22	113	171.5	microglia
RTN4RL1	237847	0.159372	4.03329e-05	0.00353354	0.00288076	0.00287288	0.00213761	0.0372944	0.00894088	-501.678	-674.411	-38.1861	-160.86	383	152	116	138	197.25	microglia
P2RY13	74191	0.0239928	3.89891e-12	0.000782489	0.000226222	0.0042401	0.0017844	0.0138691	0.00774016	-339.75	-808.004	-103.523	-185.891	515	137	29	116	199.25	microglia
IL1A	16175	0.00576189	6.7086e-06	4.96903e-05	4.69854e-07	0.00451997	0.00236061	0.013936	0.00623155	-318.683	-610.653	-103.024	-231.015	545	170	30	87	208	microglia
ANXA1	16952	0.0201875	2.17695e-07	0.00038747	9.04538e-05	10.1838	7.37087	6.8875	7.54445	1162.1	164.521	117.398	185.683	198	606	19	117	235	monocyte
NAPSA	16541	0.0119084	0.0365278	0.000709153	0.000306856	12.2898	10.4739	6.09029	5.97013	5006.3	1421.15	67.1334	61.6887	58	80	53	761	238	monocyte
PDLIM1	54132	0.0291301	0.0445619	0.000458881	0.00120279	12.0792	11.6456	5.5348	5.92366	4326.12	3202.98	45.3598	59.7016	65	34	96	768	240.75	monocyte
BHLHE41	79362	0.0114189	8.86302e-10	0.000592247	0.000787165	0.000511691	0.000161479	0.041912	0.0227132	-2818.96	-8933.78	-33.9244	-63.019	96	8	128	750	245.5	microglia
C3	12266	0.0360351	8.31353e-12	0.000335806	7.9364e-05	11.1437	9.68846	6.38777	6.17083	2261.48	824.122	82.7355	71.0452	115	134	40	720	252.25	monocyte
HBB-B1	15129	0.729799	9.62428e-05	0.0072936	0.0354202	10.6393	6.83535	5.44589	8.47527	1593.97	113.195	42.589	354.885	150	837	100	7	273.5	monocyte
SLC2A5	56485	0.181532	1.77832e-14	0.00124379	0.000333413	0.000210563	0.000203329	0.0302426	0.0397205	-6851.1	-7094.89	-47.2058	-35.8234	35	10	90	959	273.5	microglia
TJP1	21872	0.0176802	1.81401e-14	0.00035352	0.000460629	0.00186552	0.000633033	0.0279336	0.0147995	-772.848	-2278.52	-51.1489	-96.9837	273	50	79	693	273.75	microglia
C1QC	12262	0.289131	2.36861e-06	0.000259287	2.8611e-06	0.0084728	0.00201371	0.0129089	0.00709342	-169.774	-715.937	-111.261	-202.886	822	142	23	111	274.5	microglia
GDA	14544	0.0105328	0	0.00384953	0.00485489	11.8098	10.2003	5.98034	5.72702	3589.09	1175.52	62.1336	51.967	82	100	58	865	276.25	monocyte
MKI67	17345	0.0531025	8.59809e-12	0.000852451	0.000224847	9.25095	7.25414	5.99831	8.36556	608.273	151.656	62.9251	328.826	337	658	57	68	280	monocyte
CCR2	12772	0.00576189	2.49651e-10	0.00156364	0.000391183	9.09862	7.31595	6.52161	7.48424	547.224	158.338	90.8756	178.053	361	633	33	131	289.5	monocyte
ADAMTS1	11504	0.0325066	0.345849	0.00904442	0.00629513	2.73139e-05	5.71686e-05	0.0290442	0.0474849	-52818.5	-25235.3	-49.174	-29.8849	3	2	85	1069	289.75	microglia
PMEPA1	65112	0.0665579	1.12671e-10	0.00119389	0.000793091	0.000844724	0.00158723	0.0420147	0.0255912	-1707.39	-908.438	-33.8403	-55.8763	138	121	129	775	290.75	microglia
LY6C2	100041546	0.0955701	0.0450762	0.000274864	5.60239e-05	16.16	13.7342	8.05296	4.68558	73219.4	13626.5	264.573	24.7335	1	4	4	1197	301.5	monocyte
ATP8A2	50769	0.0100669	8.75145e-10	0.00126405	0.000415298	0.00289592	0.000905147	0.0305435	0.0127991	-497.682	-1593.38	-46.7359	-112.219	388	67	91	668	303.5	microglia
RASGRP3	240168	0.00576189	1.26155e-10	0.00062453	6.12532e-05	0.00770332	0.00357468	0.0127173	0.0109091	-186.783	-403.087	-112.945	-131.748	776	267	21	159	305.75	microglia
RND3	74194	0.00761326	0	0.00334948	0.00339204	11.9882	10.3325	5.29361	5.21361	4061.51	1288.43	38.2225	36.1067	68	89	115	956	307	monocyte
CCNB1	268697	0.209215	0.000956249	0.00155113	0.000634565	10.1976	9.06187	5.00093	6.65522	1173.29	533.435	31.0207	99.7906	192	201	145	690	307	monocyte
C1QA	12259	0.0417739	1.34717e-09	0.000368324	8.80917e-08	0.00335115	0.000554559	0.0184373	0.0222834	-430.008	-2601.02	-77.7498	-64.2442	438	43	44	742	316.75	microglia
LOC100038947	100038947	0.0528298	1.57611e-08	0.00448757	0.00655092	8.21514	7.78217	5.3242	6.94881	296.169	219.123	39.063	122.538	572	464	111	161	327	monocyte
GPR141	353346	0.0178302	3.70358e-07	0.000941395	0.000894175	9.85227	8.0838	6.25305	6.64662	923.336	270.31	75.2702	99.1915	236	385	48	692	340.25	monocyte
SLFN1	20555	0.0105328	3.26717e-10	0.0100034	0.0122252	11.3983	9.63016	5.15365	5.08436	2698.14	791.44	34.5961	32.927	99	139	125	1011	343.5	monocyte
EGR1	13653	0.060693	5.48623e-12	0.0228716	0.0175336	0.00429001	0.00150986	0.0249899	0.018489	-335.792	-955.017	-57.2326	-77.5308	522	115	65	712	353.5	microglia
BETA-S	100503605	0.680765	1.7545e-06	0.00622182	0.0354202	10.0083	6.39775	5.0518	8.47527	1028.92	83.317	32.1698	354.885	218	1061	136	8	355.75	monocyte
1810033B17RIK	69189	0.0110653	3.27351e-07	0.00264951		9.87156	6.96728	5.85371		935.775	124.129	56.8286		233	769	67		356.333	monocyte
KLRB1F	232408	0.104145	1.14532e-07	0.000844451	0.000522322	11.1524	8.6073	5.41002	5.29991	2275.18	388.991	41.5187	38.3942	112	272	102	942	357	monocyte
ANXA2	12306	0.0201875	0.00157137	2.48967e-05	6.40503e-06	9.43924	6.56811	6.46808	7.37066	693.216	93.8851	87.5288	164.497	303	967	35	137	360.5	monocyte
FSCN1	14086	0.0851716	2.54037e-06	0.00129557	0.000584854	0.00228723	0.00268167	0.07203	0.0164016	-630.262	-537.484	-19.5333	-87.4617	328	198	218	704	362	microglia
STXBP6	217517	0.0196158	1.00699e-08	0.00184348	0.00180144	10.5451	9.16858	4.29871	5.53211	1493.11	574.463	18.6807	45.2733	160	180	231	890	365.25	monocyte
LGALS3	16854	0.0196239	5.53267e-12	0.000268792	1.98156e-05	8.80381	8.53856	5.57067	6.73585	445.899	370.847	46.5267	105.584	426	283	93	675	369.25	monocyte
TOP2A	21973	0.0788712	5.283e-14	0.00157672	0.000496345	8.65503	6.84054	6.75967	7.23457	402.111	113.606	107.359	149.599	468	832	25	154	369.75	monocyte
FAM55D	244853	0.04253	0.0915258	0.00323665	0.00641436	12.2745	10.1427	3.89011	5.15056	4953.37	1129.45	13.8266	34.52	59	104	339	984	371.5	monocyte
NPNT	114249	0.231174	0.031765	0.00784481	0.00354747	0.000374843	0.000548802	0.0917036	0.0491193	-3848.3	-2628.31	-15.2374	-28.8741	73	40	298	1092	375.75	microglia
SPN	20737	0.132638	3.05093e-13	0.00271819	0.00330568	10.6093	8.67447	4.24577	5.56276	1561.17	407.579	17.9716	46.2671	153	259	243	884	384.75	monocyte
SCAMP5	56807	0.0304794	2.86265e-05	0.00134583	0.000199981	0.00299498	0.00406865	0.043327	0.0191867	-481.205	-354.088	-32.8003	-74.6938	398	296	133	714	385.25	microglia
RARA	19401	0.0630214	2.58507e-12	0.000695491	4.89301e-05	10.206	8.08742	4.59018	5.8074	1180.14	270.992	23.0869	55.0017	191	384	180	787	385.5	monocyte
CFP	18636	0.00666898	4.29316e-07	0.000109716		9.08703	7.49384	4.19642		542.838	179.248	17.3337		366	561	254		393.667	monocyte
TMEM119	231633	0.158959	7.47994e-08	0.00110957	4.31642e-06	0.00425001	0.00168437	0.0242971	0.0284252	-338.957	-856.019	-58.8786	-50.2558	517	129	62	872	395	microglia
F10	14058	0.0542633	7.06589e-05	0.000528973	0.000372179	13.678	12.2028	4.8826	4.35048	13105.3	4713.2	28.4992	19.3998	16	20	153	1392	395.25	monocyte
SIRPB1B	668101	0.0326965	0.000171567	0.0115203		10.1117	7.084	4.11924		1105.46	134.674	16.3787		206	725	271		400.667	monocyte
GPR56	14766	0.163064	1.04864e-06	0.00177239	0.000504863	0.0053621	0.00296832	0.0306587	0.0158976	-268.555	-485.531	-46.5583	-90.2501	602	224	92	696	403.5	microglia
TSPAN7	21912	0.0188828	3.15974e-07	0.000773349	0.00256889	0.00510185	0.00218656	0.0516447	0.0217066	-282.279	-659.303	-27.438	-65.965	583	156	157	736	408	microglia
GPR34	23890	0.0167807	2.9673e-07	0.00686249	0.000637201	0.0133499	0.00476006	0.0165883	0.00679535	-107.569	-302.584	-86.4718	-211.807	1150	346	36	102	408.5	microglia
MET	17295	0.0680853	1.21841e-08	0.00180722	0.00176048	9.0292	8.0127	5.30666	5.94649	521.469	257.264	38.5789	60.6698	374	403	113	762	413	monocyte
GRIA3	53623	0.112379	3.55747e-11	0.0177428	0.0204754	12.6214	10.6931	4.7749	4.30296	6300.09	1654.61	26.3771	18.7388	43	65	164	1408	420	monocyte
BUB1	12235	0.0506558	4.78039e-06	0.00231391	0.000456078	10.7764	9.15941	4.62498	4.7083	1752.99	570.816	23.675	25.142	136	184	177	1187	421	monocyte
PLAC8	231507	0.0835721	2.42009e-06	0.00100719	0.000470329	8.843	7.46202	5.91054	6.68719	458.206	175.317	59.1522	102.049	416	573	61	687	434.25	monocyte
KIF11	16551	0.0446193	4.5764e-08	0.000993167	9.05101e-05	9.1122	7.47034	5.44088	6.15555	552.408	176.336	42.4377	70.286	359	568	101	721	437.25	monocyte
LILRA6	18726	0.204439	1.7012e-11	2.18738e-05	5.05908e-08	9.57151	6.39617	4.25285	6.86282	759.869	83.2244	18.065	115.39	277	1064	241	172	438.5	monocyte
PGLYRP1	21946	0.602342	7.97765e-05	0.00335717	5.05908e-08	8.7057	7.66885	4.30185	6.86282	416.52	202.495	18.7236	115.39	450	506	230	569	438.75	monocyte
PLCB1	18795	0.0339735	0	4.64827e-05	4.62953e-05	12.1847	10.9335	4.24411	4.33802	4654.53	1954.8	17.9498	19.2244	63	55	244	1396	439.5	monocyte
LDLRAD3	241576	0.0296911	9.03468e-12	0.000124071	2.51322e-05	9.03895	7.97978	4.21601	6.00107	525.01	251.437	17.5843	63.0477	372	409	252	746	444.75	monocyte
NUF2	66977	0.0483916	1.3857e-10	0.00244658	0.000375348	10.1752	8.28907	4.58906	4.9509	1155.19	311.793	23.0683	29.9292	199	335	181	1066	445.25	monocyte
X99384	27355	0.187754	6.58182e-10	0.00223111	0.000405612	0.000139006	0.000503006	0.107868	0.0706276	-10378.2	-2867.65	-12.8809	-19.9309	24	38	366	1353	445.25	microglia
SERPINB1A	66222	0.265121	0.0375103	0.00256057	0.00201456	10.5772	10.5666	5.39571	4.2212	1526.74	1515.53	41.0989	17.6513	156	74	104	1474	452	monocyte
ST3GAL6	54613	0.307096	1.03641e-13	0.000269411	8.40805e-06	0.00685777	0.00523698	0.0240185	0.0139931	-209.874	-274.983	-59.5674	-102.601	709	376	60	681	456.5	microglia
AHNAK	66395	0.00186531	5.84918e-05	0.00235692	0.00259109	10.122	8.99153	5.56059	4.46639	1113.39	508.004	46.196	21.1063	205	214	94	1320	458.25	monocyte
XDH	22436	0.000219057	2.23376e-07	4.64827e-05	8.15183e-05	9.61053	7.66068	5.01595	5.36514	780.733	201.346	31.3557	40.2162	267	509	142	915	458.25	monocyte
RNF180	71816	0.00761326	1.78887e-09	0.00152655	0.0013029	0.00308545	0.00258457	0.0889976	0.0393293	-467.08	-557.696	-15.7156	-36.1847	410	190	291	952	460.75	microglia
CYBB	13058	0.00243904	0	0.000592247	0.000523303	8.61157	7.43313	5.85882	6.15389	390.148	171.821	57.0339	70.2044	478	585	66	723	463	monocyte
CDCA3	14793	0.377716	7.54951e-05	0.00344156	0.00347684	9.58153	7.02276	5.65153	5.99406	765.173	129.035	49.2665	62.7371	275	746	84	758	465.75	monocyte
IFI203	15950	0.0982188	0	0.000335806	0.000470329	8.48985	7.4539	5.38399	6.48605	358.501	174.327	40.7583	88.6387	496	577	106	699	469.5	monocyte
S100A11	20195	0.0188828	6.39222e-08	0.000111523		8.75831	7.3576	3.75922		432.026	163.006	12.5406		434	611	376		473.667	monocyte
E2F8	108961	0.0493399	0	0.00252209	0.00104138	9.06828	8.73392	5.18906	4.72618	535.815	424.767	35.4808	25.4681	369	251	122	1174	479	monocyte
DGKG	110197	0.0304794	1.137e-09	0.000327031	0.000446509	11.463	9.3831	4.09348	4.3157	2821.92	666.721	16.0711	18.9138	95	155	282	1402	483.5	monocyte
PTPRM	19274	0.0613269	4.68731e-13	0.00120522	0.0004986	0.00116217	0.00142939	0.104147	0.0653309	-1240.88	-1008.81	-13.3585	-21.5867	182	113	348	1304	486.75	microglia
TPX2	72119	0.231582	1.77251e-14	0.00329904	0.0024485	8.63793	7.69014	4.51513	5.79109	397.359	205.521	21.866	54.3723	472	495	190	792	487.25	monocyte
AGMO	319660	0.0499689	8.21362e-05	0.000573647	8.43323e-05	0.0126048	0.00917124	0.0283308	0.00917822	-113.956	-156.807	-50.4248	-156.687	1104	641	81	142	492	microglia
UPK1B	22268	0.282183	6.70392e-05	0.00359766	0.00190792	0.00192222	0.00429672	0.0575679	0.0591375	-750.036	-335.267	-24.5641	-23.899	283	313	171	1211	494.5	microglia
NUAK1	77976	0.0196659	2.08293e-05	0.00335717	0.0007074	0.00869512	0.00471582	0.0254245	0.0224373	-165.421	-305.427	-56.2457	-63.8005	839	340	68	743	497.5	microglia
CASC5	76464	0.0430026	6.49316e-12	0.00154189	0.000448756	8.80715	7.0386	4.91343	6.40631	446.935	130.471	29.1364	83.8184	425	741	152	705	505.75	monocyte
MS4A4C	64380	0.00761326	1.01276e-11	0.000564053	0.00148374	8.56401	6.87999	5.74285	6.75906	377.463	116.783	52.5513	107.313	483	810	75	670	509.5	monocyte
HPSE	15442	0.0533678	2.77115e-07	0.000952	0.000144912	9.03302	7.34813	5.14483	5.24993	522.852	161.932	34.3792	37.0527	373	614	127	948	515.5	monocyte
RAPGEF5	217944	0.366731	2.0264e-06	0.000335806	0.000314601	0.0104992	0.00376548	0.0383024	0.0160062	-136.911	-382.638	-37.1681	-89.635	969	277	119	697	515.5	microglia
DST	13518	0.0330974	0	0.00267469	0.00265532	0.00980725	0.00302319	0.0455932	0.0255965	-146.605	-476.71	-31.1454	-55.8644	919	228	144	777	517	microglia
SGMS2	74442	0.126837	5.14196e-08	0.00294861	0.00295716	10.5564	9.27949	3.57556	4.42965	1504.94	620.449	10.9221	20.5505	158	166	441	1340	526.25	monocyte
CRIP1	12925	0.0741675	5.07631e-05	0.000153382	8.62272e-06	7.6429	7.58378	5.30692	6.09416	198.868	190.843	38.5862	67.3166	742	530	112	727	527.75	monocyte
GM11428	100034251	0.0263551	0.00040108	0.0040818	0.00517941	7.57159	6.26947	6.1761	7.03998	189.229	76.1433	71.3089	130.597	770	1139	50	160	529.75	monocyte
PLEKHG1	213783	0.0442781	7.49625e-08	0.000864889		9.73236	6.78109	3.46556		849.613	108.979	10.0468		247	863	484		531.333	monocyte
KLRA2	16633	0.105926	5.5007e-09	0.00439389	0.00461248	8.41306	6.84096	5.67886	6.15359	339.865	113.64	50.228	70.1893	514	831	82	724	537.75	monocyte
KIF23	71819	0.0665579	6.41874e-08	0.00315521	0.00133936	8.0056	7.91395	5.05218	5.17257	255.996	240.177	32.1785	35.066	626	425	135	972	539.5	monocyte
KIF4	16571	0.0929649	2.26223e-07	0.00287157	0.00102305	12.9262	10.4117	3.99251	3.89956	7782.52	1361.19	14.9171	13.924	31	82	304	1753	542.5	monocyte
HSPB3	56534	0.0110247	0.477383	0.0346727	0.00883235	0.00225526	0.00741579	0.0978381	0.0430561	-639.202	-194.044	-14.2514	-33.0099	324	524	328	1010	546.5	microglia
ITGA9	104099	0.0361468	7.38853e-05	0.00173514	0.00150149	0.00490314	0.00604122	0.0776593	0.0399551	-293.739	-238.309	-18.0817	-35.6102	574	427	240	962	550.75	microglia
TGFA	21802	0.16496	3.42863e-08	0.00234616	0.00205463	0.00125717	0.00103112	0.143773	0.0757422	-1147.08	-1398.65	-9.54286	-18.5518	200	81	515	1421	554.25	microglia
OLFM1	56177	0.0147303	5.94877e-08	0.00247926	0.00118041	9.39739	8.30397	3.32995	5.00625	673.366	315.041	9.05578	31.139	313	330	542	1041	556.5	monocyte
LIPH	239759	0.125573	4.98356e-07	0.00324511	0.00986192	0.00232858	0.00214223	0.104816	0.0751844	-619.061	-672.954	-13.2701	-18.6931	331	154	350	1412	561.75	microglia
ACPL2	235534	0.31867	0.0055945	0.00349483	0.00218067	12.0319	10.09	3.70092	3.96138	4186.56	1088.89	12.0044	14.5774	66	107	399	1676	562	monocyte
KIF14	381293	0.0495578	7.15475e-10	0.00330813		8.80889	7.07553	3.3547		447.476	133.88	9.22976		424	729	534		562.333	monocyte
PLXNA4	243743	0.0189997	2.03509e-06	0.00187872	0.00203906	0.00226537	0.0016596	0.093706	0.081804	-636.348	-868.804	-14.9014	-17.1407	326	128	305	1506	566.25	microglia
GAS6	14456	0.37013	1.0971e-05	0.00222091	0.001028	0.00603962	0.00271167	0.0671638	0.0588885	-238.372	-531.533	-20.9841	-24.0022	663	202	202	1210	569.25	microglia
ADAMTS16	271127	0.0418731	6.99856e-14	0.00157043	0.00253533	0.00102416	0.00160844	0.170417	0.0751312	-1408.17	-896.452	-7.97549	-18.7067	164	124	608	1410	576.5	microglia
RASGRP2	19395	0.0878064	3.0605e-13	0.000303463	0.00032778	7.22154	9.12707	4.09118	5.31406	148.245	558.142	16.0439	38.7824	913	189	283	931	579	monocyte
ITGB7	16421	0.0213055	8.70722e-11	0.000309627	0.000414972	9.86449	8.99368	3.95383	4.10152	931.199	508.762	14.496	16.1664	234	213	318	1568	583.25	monocyte
GAL3ST4	330217	0.0257325	8.27672e-07	0.000588615		0.0134993	0.00566587	0.0643677		-106.373	-254.129	-21.9171		1158	406	189		584.333	microglia
SHCBP1	20419	0.0996769	2.83762e-07	0.00231886	0.000190113	9.65102	7.61893	4.17726	4.47302	802.982	195.574	17.0917	21.2082	255	517	259	1309	585	monocyte
F13A1	74145	0.0281317	4.78303e-10	0.000111523	7.25835e-06	7.27421	6.95061	6.74946	6.69197	153.794	122.692	106.594	102.391	885	777	26	684	593	monocyte
S1PR1	13609	0.613314	5.66328e-05	0.00873858	0.0110526	0.00593473	0.00358586	0.131576	0.045778	-242.594	-401.829	-10.4724	-31.0177	654	268	465	1046	608.25	microglia
BLNK	17060	0.0896023	2.30928e-11	0.000322817	2.76794e-05	0.00673364	0.00520493	0.0542946	0.058752	-213.752	-276.679	-26.0747	-24.059	700	374	165	1208	611.75	microglia
THRSP	21835	0.132638	4.77738e-06	0.0297348	0.00660497	0.0021045	0.00309071	0.172844	0.0643201	-685.028	-466.285	-7.85678	-21.9336	307	232	614	1298	612.75	microglia
IFI205	226695	0.208399	2.57594e-08	0.00263953	0.00492368	8.25089	7.11337	5.1518	4.98726	303.625	137.464	34.5505	30.7187	558	711	126	1058	613.25	monocyte
LEPREL1	210530	0.0474066	1.35811e-05	0.00340262	0.00508732	0.00990381	0.00798999	0.0656528	0.0247204	-145.171	-180.063	-21.4784	-57.8621	929	557	198	772	614	microglia
FOXRED2	239554	0.0660361	7.13936e-09	0.00507943	0.00614198	9.56107	6.94206	4.06877	4.81271	754.384	121.962	15.7812	27.1042	279	781	289	1114	615.75	monocyte
C3AR1	12267	0.0028422	9.81177e-10	0.00256141	0.00125804	0.0146059	0.00682526	0.0275468	0.0134081	-98.2757	-210.876	-51.8742	-107.1	1236	481	77	674	617	microglia
STAB1	192187	0.0939741	1.94434e-05	0.00040914	0.000332309	0.00755294	0.00289887	0.0848664	0.0595555	-190.511	-497.176	-16.5045	-23.7278	768	219	267	1216	617.5	microglia
CYTIP	227929	0.0107084	1.66912e-07	0.00040914	0.000450274	7.73158	5.72333	5.52781	7.12893	211.539	51.8318	45.1357	138.966	704	1516	97	157	618.5	monocyte
VCAN	13003	0.307096	0	0.0389885	0.0430894	8.06557	6.76876	4.82561	5.72932	266.903	108.044	27.3566	52.0514	608	869	159	859	623.75	monocyte
PLBD1	66857	0.0214471	0	0.000970182	0.00035255	8.36782	6.19635	6.31764	6.03333	329.342	72.3308	78.7628	64.4959	530	1189	43	741	625.75	monocyte
SLC1A3	20512	0.0394588	2.14984e-07	0.000956582	2.41084e-05	0.00288176	0.00899649	0.119581	0.0480728	-500.13	-159.863	-11.5715	-29.5134	385	628	416	1080	627.25	microglia
LRRK2	66725	0.0129793	2.79569e-08	0.000188962	0.000414972	9.22084	7.25096	4.1129	4.5885	595.69	151.319	16.3024	23.059	344	662	273	1250	632.25	monocyte
BMPR1A	12166	0.195952	3.03984e-05	0.00282049	0.000595694	0.010766	0.00293107	0.0767579	0.0487684	-133.506	-491.707	-18.2998	-29.0854	987	222	236	1087	633	microglia
CD177	68891	0.37432	5.68996e-08	0.00175419	0.000737204	12.2213	9.27052	3.91674	3.63506	4774.17	616.595	14.1028	11.424	62	167	332	1989	637.5	monocyte
STX11	74732	0.0381033	1.07908e-06	0.00183158		9.52464	7.05981	2.66718		735.549	132.418	5.35186		285	736	915		645.333	monocyte
VIM	22352	0.0467614	0	0.000614356	0.000781448	7.82688	7.60809	5.07007	4.58384	226.053	194.102	32.5925	22.9814	682	523	134	1255	648.5	monocyte
NEIL3	234258	0.0304794	0.0026757	0.000956582		7.30578	6.92018	4.07193		157.22	120.11	15.818		870	794	285		649.667	monocyte
ADORA2B	11541	0.0374987	0.230482	0.00018776	0.000659701	9.89502	9.11283	3.14047	4.08054	951.131	552.65	7.81813	15.9186	229	192	616	1602	659.75	monocyte
JAM2	67374	0.0138335	7.47694e-06	2.15605e-05	0.00058027	0.0106004	0.00598078	0.062732	0.0482706	-135.599	-240.722	-22.5014	-29.3904	977	422	185	1084	667	microglia
TTK	22137	0.0381871	0	0.00156095	0.000351003	9.60124	10.7107	3.91871	3.60663	775.713	1674.9	14.1234	11.1816	271	64	331	2019	671.25	monocyte
ITGAL	16408	0.0032508	3.37937e-13	0.000670323	0.00195982	8.76804	7.06877	4.49315	4.46598	434.957	133.25	21.5203	21.1001	433	732	197	1325	671.75	monocyte
ASF1B	66929	0.337403	2.5958e-05	0.00259646	0.0013445	9.14715	6.71086	4.18831	4.70562	565.98	103.754	17.2308	25.0935	356	897	255	1188	674	monocyte
CEP55	74107	0.0811617	5.16745e-08	0.00270039	0.002571	9.49994	7.16747	4.15593	4.23827	723.05	142.755	16.8262	17.8733	291	687	264	1465	676.75	monocyte
IFITM3	66141	0.0559867	6.44646e-09	0.000188962	7.29287e-05	8.23704	6.79731	4.24861	4.92626	300.714	110.223	18.0089	29.4054	563	855	242	1083	685.75	monocyte
CYFIP2	76884	0.253407	1.80195e-14	0.000637937	0.000329165	9.87746	8.42278	3.16205	4.01307	939.617	342.17	7.95102	15.1456	231	307	611	1624	693.25	monocyte
PROX1	19130	0.101019	7.83427e-07	0.000483817	0.00579047	0.00105345	0.00164959	0.153043	0.117012	-1369	-874.079	-8.93558	-11.8362	169	126	549	1934	694.5	microglia
MS4A4B	60361	0.0328758	1.68014e-05	0.00141895	0.00423895	7.98678	6.73722	4.36088	4.99745	252.665	105.686	19.5473	30.9435	634	884	217	1048	695.75	monocyte
EMILIN2	246707	0.0404458	7.91542e-08	0.000924938	0.000224847	7.85487	6.46003	5.08422	5.20989	230.501	87.0364	32.9236	36.0112	677	1024	131	958	697.5	monocyte
MYO1B	17912	0.00437676	0	0.000660912	0.000484452	0.0123774	0.00542682	0.0741082	0.0487889	-116.059	-265.345	-18.9717	-29.073	1086	393	224	1088	697.75	microglia
NDRG1	17988	0.132525	1.096e-05	0.000295985	0.000226112	9.78463	6.54368	3.99739	4.54327	880.998	92.2919	14.9711	22.3163	240	982	303	1287	703	monocyte
RAB6B	270192	0.0611368	1.01262e-05	0.00610335	0.000475642	0.0114442	0.00710506	0.110456	0.0333067	-125.564	-202.552	-12.5676	-42.8174	1035	505	374	903	704.25	microglia
P2RY1	18441	0.050602	3.20135e-06	0.00500748	0.0057888	9.25337	7.35602	3.54678	4.24663	609.296	162.826	10.6865	17.9829	335	613	453	1459	715	monocyte
ESCO2	71988	0.37258	1.30498e-07	0.00199377	0.00143175	8.75464	7.44054	3.94872	4.13866	430.927	172.711	14.4413	16.6141	435	580	319	1534	717	monocyte
ANLN	68743	0.0401016	3.84938e-06	0.00112208	0.000332309	7.97315	6.19179	4.98387	5.5025	250.279	72.0993	30.6442	44.3334	640	1190	147	894	717.75	monocyte
SPAG5	54141	0.117552	0.00735945	0.00152734	0.00230328	8.69056	10.3881	3.79678	3.62148	412.162	1339.04	12.8977	11.3076	455	85	364	2007	727.75	monocyte
CIT	12704	0.159372	0.000106849	0.00286828	0.00331698	8.24117	6.59654	3.01071	6.08149	301.579	95.7733	7.05961	66.7189	562	955	675	732	731	monocyte
KLF12	16597	0.049895	3.75759e-07	0.000286151	1.81844e-05	0.00231127	0.00206544	0.106337	0.133318	-623.7	-697.992	-13.0733	-10.3292	329	148	357	2113	736.75	microglia
BIRC5	11799	0.068173	1.79599e-14	0.00133979	0.00091551	7.25048	6.59308	4.50389	5.40544	151.27	95.5415	21.6885	41.3839	900	958	193	908	739.75	monocyte
ARHGEF37	328967	0.0110653	0.00021971	0.000761687	0.000567094	8.80126	6.55027	4.47286	4.3712	445.111	92.7189	21.2057	19.6948	427	976	200	1361	741	monocyte
APBB2	11787	0.233746	1.27456e-05	0.00023529	0.0012807	0.011129	0.00400528	0.142867	0.0542357	-129.135	-359.698	-9.60645	-26.1036	1015	292	509	1150	741.5	microglia
NUSAP1	108907	0.0575774	4.41542e-06	0.00383788	0.00111613	7.3065	6.49427	5.28035	5.14498	157.298	89.1512	37.8637	34.3828	869	1002	118	990	744.75	monocyte
CD44	12505	0.00487097	0	0.000708137	0.000265214	7.21736	6.48167	4.3762	5.7341	147.813	88.3671	19.7667	52.2276	915	1013	216	842	746.5	monocyte
LTB4R1	16995	0.0858979	0.000825733	0.000548149	5.92128e-06	9.22224	6.69592	4.14136	4.20805	596.272	102.675	16.6471	17.482	343	910	265	1483	750.25	monocyte
PTGIR	19222	0.241755	2.50967e-11	0.00468893	5.05908e-08	9.62938	7.1441	2.11668	6.86282	791.014	140.446	3.33694	115.39	263	695	1544	513	753.75	monocyte
MBNL3	171170	0.0175082	1.16478e-09	0.00049207	0.000405612	6.73084	7.96531	4.4131	4.61311	105.215	248.918	20.3047	23.4728	1167	411	207	1230	753.75	monocyte
MNDA	381308	0.0562574	2.51028e-05	0.00152476	0.000470329	7.74027	6.09042	3.88779	6.48605	212.822	67.1396	13.8027	88.6387	701	1275	341	700	754.25	monocyte
TRIM59	66949	0.0220738	2.00712e-10	0.00330156	0.00121055	7.20436	6.38732	4.77825	5.68865	146.479	82.7093	26.4408	50.5769	921	1071	163	867	755.5	monocyte
BUB1B	12236	0.199978	3.90165e-11	0.0009692	0.000623308	8.75242	6.41352	4.50109	4.36578	430.261	84.2434	21.6446	19.6172	437	1053	195	1363	762	monocyte
5730528L13RIK	66665	0.0531101	0.00553066	0.0109953	0.000267059	13.2537	11.5062	2.26494	3.94409	9765.87	2907.72	3.80634	14.3918	28	36	1316	1690	767.5	monocyte
TUBA4A	22145	0.262591	1.38173e-05	0.00231886	0.00328346	7.43939	5.98519	4.8229	5.97639	172.573	62.3462	27.3033	61.9613	816	1355	160	760	772.75	monocyte
PDGFB	18591	0.0114267	0.00138052	0.00274018	0.00147599	0.00622327	0.0120649	0.114534	0.0598781	-231.323	-119.079	-12.1028	-23.5973	675	802	388	1227	773	microglia
IQGAP2	544963	0.0157327	5.37651e-10	0.000860283	0.0010353	8.92999	7.89226	5.73424	3.4106	486.746	236.578	52.2326	9.63394	395	430	76	2204	776.25	monocyte
NGP	18054	0.82503	5.94335e-05	0.0120995	0.0229715	10.2434	5.99149	3.88821	4.60615	1211.16	62.6234	13.807	23.3551	186	1348	340	1237	777.75	monocyte
CMTM8	70031	0.82503	0.000709416	0.00281572	0.0016829	0.00137072	0.00474214	0.17103	0.118607	-1052.01	-303.729	-7.94519	-11.6705	213	345	612	1954	781	microglia
CD93	17064	0.0639187	2.84415e-07	0.0016543	0.0125101	8.02083	6.403	4.43155	4.58693	258.723	83.6244	20.5788	23.0328	620	1058	205	1254	784.25	monocyte
CCDC88C	68339	0.0941817	0.00389556	0.000330404	0.000278802	12.7696	10.8101	2.87766	3.35111	6981.68	1794.36	6.34955	9.2043	34	61	756	2293	786	monocyte
ETV5	104156	0.0168134	8.10792e-06	0.00408264	0.00369464	0.0190547	0.0084292	0.063687	0.0331427	-75.2143	-170.655	-22.1566	-43.0318	1482	588	188	900	789.5	microglia
CTTNBP2NL	80281	0.0215257	1.08114e-08	5.07602e-05	0.000133471	0.0218355	0.0108332	0.034507	0.0198663	-65.5723	-132.674	-41.3108	-72.1216	1636	735	103	716	797.5	microglia
NAALAD2	72560	0.258848	0.000421141	0.0013836	0.000937176	0.00894695	0.00571385	0.114936	0.0848827	-160.75	-251.991	-12.0587	-16.5012	855	408	393	1546	800.5	microglia
B3GALNT1	26879	0.49498	4.76897e-05	0.00714682	0.00070046	0.00611907	0.00302252	0.141555	0.107067	-235.271	-476.815	-9.69997	-12.9809	670	227	502	1812	802.75	microglia
CCR5	12774	0.0178302	2.04048e-08	0.000539918	0.000200285	0.0202059	0.0129851	0.0374701	0.017997	-70.901	-110.605	-38.0048	-79.664	1554	854	117	711	809	microglia
STIL	20460	0.109664	7.0599e-06	0.0022192	0.000627499	8.09834	7.11297	3.9756	4.00847	273.058	137.426	14.7317	15.0942	593	712	309	1641	813.75	monocyte
CLEC12A	232413	0.0379427	3.26284e-06	0.000211871	1.34872e-05	7.94805	5.31651	5.8302	6.5447	245.945	38.85	55.894	92.3576	646	1861	69	695	817.75	monocyte
WHRN	73750	0.0477907	0	0.000193508	6.39547e-05	0.000782226	0.00141388	0.217471	0.146039	-1843.85	-1019.88	-6.14651	-9.38732	131	110	781	2253	818.75	microglia
PPP1R9A	243725	0.00733479	3.38429e-08	0.00229662	0.00213085	0.0148153	0.00895945	0.102437	0.0481723	-96.8793	-160.525	-13.5896	-29.4515	1243	624	345	1081	823.25	microglia
PRC1	233406	0.136174	3.83071e-08	0.00154332	0.000673176	7.16722	6.11546	4.94603	5.19658	142.731	68.3326	29.8251	35.6714	940	1252	149	960	825.25	monocyte
KCNMA1	16531	0.282427	6.51705e-07	0.00132899	0.0018979	0.00141314	0.00285468	0.110833	0.166965	-1020.41	-504.878	-12.5233	-8.15034	220	215	377	2498	827.5	microglia
MLXIPL	58805	0.0557126	3.65282e-12	0.00190351	0.000340634	0.0171501	0.00802298	0.118727	0.0412723	-83.6228	-179.321	-11.6582	-34.458	1370	560	413	985	832	microglia
MEFV	54483	0.158943	1.05935e-06	0.00120556	0.000478733	9.18979	6.25463	4.10485	4.10283	582.986	75.3539	16.2062	16.1821	349	1150	279	1561	834.75	monocyte
KIF18B	70218	0.0529155	3.40504e-05	0.00150501	0.000634565	9.41284	6.24872	3.8317	4.13443	680.625	75.0416	13.2382	16.5626	309	1154	351	1545	839.75	monocyte
CDCA8	52276	0.280846	2.61107e-10	0.00213433	0.00181909	7.54628	6.13443	4.22647	4.81101	185.921	69.25	17.7195	27.071	777	1233	247	1116	843.25	monocyte
TMC7	209760	0.157348	1.11711e-06	4.64827e-05	0.00125137	0.0108243	0.00402229	0.123815	0.095228	-132.784	-358.176	-11.1591	-14.6554	991	293	431	1670	846.25	microglia
CADM1	54725	0.175921	1.80796e-14	0.000200222	0.000226112	0.0177949	0.00529571	0.0972879	0.0623574	-80.5747	-271.927	-14.3348	-22.6395	1407	383	325	1275	847.5	microglia
CLEC2I	93675	0.048049	0.00104407	0.00186903	0.00624792	8.1952	5.40636	4.10656	5.88262	292.09	41.4109	16.2265	57.9989	575	1770	277	771	848.25	monocyte
GAPT	238875	0.00915362	3.42752e-06	0.00122337	0.000224847	6.84847	6.40052	4.16115	5.09779	114.237	83.4792	16.8908	33.2443	1103	1059	262	1009	858.25	monocyte
VAV3	57257	0.00437055	5.09683e-10	0.000776024	0.000584854	8.05034	6.06329	4.53369	4.43301	264.09	65.8702	22.162	20.6008	612	1302	187	1338	859.75	monocyte
ASPM	12316	0.0272549	5.95304e-13	0.00159281	0.000572274	8.21832	6.33945	4.11626	4.15389	296.825	79.9775	16.3427	16.801	571	1095	272	1520	864.5	monocyte
DEPDC1B	218581	0.363132	0.000854578	0.00196919	0.000346193	8.73269	6.32888	3.36162	4.34916	424.405	79.3862	9.27891	19.3811	442	1108	532	1394	869	monocyte
IFI27L2A	76933	0.0506574	0.000422232	0.000152512	5.82328e-05	7.62356	6.93333	3.75556	4.11294	196.206	121.219	12.5063	16.3029	757	788	378	1556	869.75	monocyte
1110021L09RIK	76306	0.00489297	8.72329e-11	0.00642533		0.0224704	0.00506538	0.159472		-63.7055	-284.315	-8.55591		1674	363	574		870.333	microglia
SERPINE2	20720	0.0218396	2.38584e-06	0.000152512	0.000190113	0.0318178	0.00860078	0.0289251	0.0163527	-44.8443	-167.241	-49.3786	-87.7247	2127	600	83	703	878.25	microglia
IQGAP1	29875	0.0087099	3.69869e-07	2.15605e-05	2.19376e-07	7.39329	5.39222	5.01931	5.74457	167.113	40.9971	31.4311	52.6151	831	1791	141	841	901	monocyte
5730590G19RIK	77011	0.0450619	3.81339e-05	0.00419303	0.0048436	8.35035	6.87279	3.13933	4.00721	325.366	116.196	7.81116	15.0802	534	817	617	1643	902.75	monocyte
EYA4	14051	0.00224458	1.09951e-05	0.000864889	0.000256833	0.00935857	0.00784578	0.143445	0.0961049	-153.658	-183.382	-9.56574	-14.5172	886	550	512	1681	907.25	microglia
GAS7	14457	0.00761326	1.85088e-12	0.00095113	0.000414972	7.37602	6.20681	3.64938	4.62336	165.113	72.8645	11.5479	23.6474	840	1184	417	1221	915.5	monocyte
CCNA2	12428	0.162166	6.18461e-06	0.000767071	0.000414972	7.11061	5.30467	5.48484	6.06771	137.2	38.5243	43.7818	66.0752	966	1874	98	735	918.25	monocyte
SLC25A24	229731	0.0410345	0.000283379	0.00152734	0.000509925	8.01061	6.2237	4.5151	3.91175	256.89	73.7343	21.8655	14.0506	625	1171	191	1719	926.5	monocyte
MED12L	329650	0.00576189	0.000322185	0.000528087	4.62953e-05	0.0252385	0.0163231	0.21018	0.0122665	-56.6639	-87.8846	-6.37624	-117.114	1813	1017	753	168	937.75	microglia
UHRF1	18140	0.121067	5.26591e-14	0.00167557	0.0023263	6.81148	6.83265	3.57044	4.37409	111.321	112.981	10.8798	19.7364	1125	840	444	1357	941.5	monocyte
F5	14067	0.00186531	7.06363e-06	0.00130534	0.00201945	8.25609	6.27295	4.0203	3.83596	304.725	76.3296	15.2268	13.2804	557	1136	299	1786	944.5	monocyte
MSR1	20288	0.0112494	9.81725e-06	0.00253637	0.00249361	6.86056	5.47204	4.81381	5.75737	115.207	43.3861	27.1256	53.093	1095	1717	162	838	953	monocyte
DNAHC8	13417	0.0607748	8.79468e-08	0.00525511	0.00518826	10.312	7.61187	3.31431	3.1808	1270.18	194.614	8.94735	8.06812	177	521	547	2573	954.5	monocyte
PLP2	18824	0.289646	0	6.77964e-05	0.00234359	9.17707	9.03882	5.60087	2.87174	577.86	524.962	47.532	6.31946	350	206	89	3173	954.5	monocyte
NDC80	67052	0.047954	5.95799e-05	0.000990198	0.00219186	6.60748	5.72848	4.09471	5.8258	96.5104	52.0206	16.0856	55.7204	1244	1512	281	786	955.75	monocyte
CENPE	229841	0.156633	3.12029e-06	0.00220008	0.000334526	7.24342	5.96088	4.35446	4.37762	150.526	61.2877	19.4561	19.7871	905	1367	219	1354	961.25	monocyte
DAGLA	269060	0.495701	6.36005e-06	0.00225978	0.00157164	0.0171648	0.0112155	0.114716	0.0690431	-83.5508	-128.135	-12.0829	-20.3996	1371	750	389	1341	962.75	microglia
ANK2	109676	0.352867	6.61617e-09	0.00274323	0.00135886	0.00623464	0.00358848	0.198522	0.143676	-230.9	-401.535	-6.77863	-9.5496	676	269	703	2214	965.5	microglia
ADHFE1	76187	0.153306	9.81803e-06	0.00400195	0.00610319	0.0104716	0.00710383	0.166731	0.106331	-137.272	-202.587	-8.16247	-13.0741	964	504	596	1804	967	microglia
PLEKHG3	263406	0.104145	1.54968e-13	0.00133939	0.000729785	9.61435	7.37553	2.53766	3.63334	782.805	165.056	4.80647	11.4092	266	605	1016	1992	969.75	monocyte
LHFPL2	218454	0.0402921	1.55484e-08	0.00141554	9.04538e-05	0.0298835	0.0104006	0.0768168	0.038229	-47.779	-138.213	-18.2854	-37.2405	2039	708	237	944	982	microglia
MAGED1	94275	0.18871	8.6853e-09	0.00146778	0.00181909	0.0157244	0.0179771	0.0897291	0.0617897	-91.2497	-79.7528	-15.5835	-22.852	1289	1099	292	1257	984.25	microglia
BMX	12169	0.0430026	6.22908e-06	0.000472604	0.000537318	9.64848	8.13542	3.32414	3.07263	801.569	280.194	9.01537	7.41306	256	370	545	2789	990	monocyte
ZFP36L1	12192	0.0728458	7.47084e-08	0.0186885	0.00976035	0.022195	0.0134992	0.0797285	0.0556001	-64.5022	-106.373	-17.5997	-25.4509	1657	879	251	1178	991.25	microglia
AB124611	382062	0.0940907	2.46768e-08	0.00184348	0.00310545	6.70421	5.68169	4.12831	5.1844	103.272	50.3285	16.4882	35.3631	1186	1547	268	970	992.75	monocyte
RAB3IL1	74760	0.0665145	5.84335e-06	0.00303141	0.00205058	0.0280402	0.0184676	0.0580527	0.0213632	-50.9525	-77.6212	-24.3548	-67.0333	1954	1127	175	728	996	microglia
TFEC	21426	0.235578	1.37828e-05	0.00420274	0.00423895	7.6163	5.2579	4.46833	4.87001	195.215	37.2635	21.1361	28.2428	759	1926	201	1100	996.5	monocyte
AURKB	20877	0.241404	6.46387e-09	0.00274326	0.00340736	6.57237	5.68437	4.3108	5.16278	94.1657	50.4239	18.8463	34.8221	1266	1546	227	981	1005	monocyte
DOCK5	68813	0.0214471	0.000324382	0.000252403	1.81844e-05	6.97231	5.60531	3.69982	5.11058	124.567	47.6817	11.9944	33.5493	1039	1604	400	1008	1012.75	monocyte
PBK	52033	0.120896	9.10761e-05	0.00174692	0.000936593	7.16505	6.85663	3.795	3.6839	142.514	114.891	12.8806	11.8518	942	823	367	1933	1016.25	monocyte
ZFP532	328977	0.209878	5.95857e-05	0.000188962	0.000566024	0.0182003	0.00522362	0.155401	0.0971075	-78.7686	-275.687	-8.79265	-14.3623	1442	375	555	1695	1016.75	microglia
3110035E14RIK	76982	0.315163	0	0.016823	0.0237364	0.00428507	0.00287131	0.186752	0.174513	-336.18	-501.951	-7.23598	-7.77708	521	216	662	2673	1018	microglia
PLK1	18817	0.35859	8.95079e-06	0.00136725	0.00347684	7.8543	5.31673	4.21907	4.55102	230.409	38.856	17.6237	22.442	678	1860	249	1286	1018.25	monocyte
RACGAP1	26934	0.0657462	0.000261381	0.00129262	0.000469896	5.59906	6.41113	5.02434	5.75978	47.4712	84.1027	31.5446	53.1834	2045	1055	139	837	1019	monocyte
PLXNC1	54712	0.0304794	0.000838906	0.00139593	0.000224847	7.2956	6.08554	3.66879	4.15621	156.107	66.9096	11.7179	16.8297	874	1285	411	1519	1022.25	monocyte
LGMN	19141	0.0631489	1.28675e-12	0.000116338	3.74429e-06	0.0287093	0.0115353	0.0601143	0.055165	-49.7535	-124.568	-23.5027	-25.6556	1985	767	178	1160	1022.5	microglia
SGOL2	68549	0.0406756	0.000313192	0.000873076	0.000210091	7.21122	5.25874	3.96433	5.19343	147.181	37.2859	14.6093	35.5913	917	1924	313	966	1030	monocyte
RAB11FIP1	75767	0.0372968	1.56718e-09	0.000773182		6.75339	7.49891	2.21619		106.888	179.883	3.64664		1154	559	1384		1032.33	monocyte
SNN	20621	0.0450619	5.85824e-05	0.00252598	0.00295385	0.0312983	0.0135902	0.0782533	0.0324167	-45.5967	-105.658	-17.9407	-44.0066	2103	885	245	898	1032.75	microglia
TMEM204	407831	0.652966	0.000623005	0.000503636	0.000574543	0.0085017	0.00405223	0.249638	0.131811	-169.195	-355.525	-5.29357	-10.4528	824	295	926	2105	1037.5	microglia
THBD	21824	0.095547	8.84138e-05	0.0047152	0.0105791	7.9459	6.05329	3.08758	4.11667	245.578	65.4082	7.50069	16.3477	648	1311	643	1550	1038	monocyte
TLR8	170744	0.0464078	0.00174444	0.00353918	0.00546372	7.97926	5.07485	4.69267	4.57155	251.347	32.7041	24.8604	22.7779	638	2106	169	1263	1044	monocyte
AOAH	27052	0.0181141	3.36957e-07	0.000368324	0.000279078	6.7316	5.32946	4.5022	5.16353	105.271	39.2095	21.662	34.8409	1166	1842	194	979	1045.25	monocyte
GPR84	80910	0.279065	0.00130614	0.00448325	0.0029652	0.0394728	0.0134888	0.0464271	0.0139571	-36.0514	-106.456	-30.5771	-102.868	2483	878	148	679	1047	microglia
KCNAB2	16498	0.144494	0.00665034	0.00211791	0.000774401	6.97947	5.42002	4.18019	4.76076	125.191	41.8143	17.1286	26.1101	1037	1756	257	1148	1049.5	monocyte
ZFP827	622675	0.042345	8.31191e-05	0.00110957		0.0184235	0.00941092	0.281293		-77.8084	-152.801	-4.64504		1456	655	1052		1054.33	microglia
AC161053		0.0478243	1.31455e-06	0.0021952	2.14576e-06	0.000222777	0.00247905	0.295416	0.189675	-6475.47	-581.455	-4.40065	-7.11709	41	177	1114	2891	1055.75	microglia
E2F7	52679	0.262096	3.54192e-06	0.00198044	0.00228065	8.78412	7.10838	3.00482	3.21538	439.843	136.986	7.02677	8.28809	428	715	679	2469	1072.75	monocyte
FOXM1	14235	0.0831416	1.599e-07	0.000655996	0.000292148	6.99496	6.08842	4.03478	3.92234	126.553	67.0452	15.3904	14.1615	1030	1281	295	1707	1078.25	monocyte
CD300LB	217304	0.15553	3.57611e-08	0.00204935	0.00644238	7.16428	5.88767	4.28981	3.90372	142.437	58.2061	18.5597	13.9671	943	1401	232	1744	1080	monocyte
PDE7B	29863	0.187754	1.64747e-05	0.00815934	0.0138886	7.92064	6.86454	3.03735	3.40617	241.298	115.529	7.20983	9.60134	658	820	664	2207	1087.25	monocyte
GBGT1	227671	0.327184	0.00174671	0.000662422	0.00147599	0.0312132	0.0132666	0.12415	0.0386247	-45.7225	-108.247	-11.1277	-36.8538	2098	867	433	951	1087.25	microglia
MAFB	16658	0.589555	7.66294e-06	0.000518048	0.0002138	0.0228844	0.0193785	0.097072	0.0562166	-62.544	-73.9493	-14.3677	-25.1664	1698	1165	323	1186	1093	microglia
MFSD6	98682	0.0230454	9.66133e-08	0.00200251	0.00251321	7.64927	6.43284	2.60567	3.98082	199.752	85.3926	5.08672	14.7887	737	1042	959	1662	1100	monocyte
PRR11	270906	0.120805	0.000184816	0.0026212	0.00131746	5.95363	5.48243	5.02627	5.75363	60.9756	43.707	31.588	52.9531	1724	1707	138	840	1102.25	monocyte
LBP	16803	0.236537	0.00091518	0.00743059	0.0102736	8.50617	5.76945	3.68929	3.56896	362.59	53.5478	11.8999	10.8676	493	1475	404	2046	1104.5	monocyte
YES1	22612	0.239588	4.7344e-05	0.00234457	0.00130149	0.0165322	0.00811515	0.196781	0.107071	-86.7669	-177.278	-6.84282	-12.9803	1343	563	695	1822	1105.75	microglia
CD276	102657	0.595063	0.00138268	0.000330404	0.000567094	0.00554501	0.0100292	0.198945	0.160275	-259.679	-143.349	-6.7632	-8.51065	619	685	705	2415	1106	microglia
TPPP	72948	0.0355719	3.89215e-05	0.00343406	0.00570696	0.02804	0.00859421	0.196455	0.0560417	-50.9529	-167.369	-6.85498	-25.2465	1953	598	694	1184	1107.25	microglia
KLHDC8B	78267	0.130114	0	0.00175436	0.00245272	0.0129998	0.00280027	0.327929	0.107237	-110.479	-514.698	-3.91834	-12.9595	1131	210	1270	1826	1109.25	microglia
DCBLD2	73379	0.82503	6.62599e-07	0.00121511	8.40805e-06	0.0116278	0.0211319	0.362677	0.0139931	-123.574	-67.7721	-3.49883	-102.601	1044	1260	1457	680	1110.25	microglia
REM1	19700	0.0202582	0.293045	0.0011789	0.00149737	9.8479	7.98763	3.07562	2.88155	920.536	252.815	7.43054	6.36941	237	407	650	3152	1111.5	monocyte
D0H4S114	27528	0.0291301	0.00030074	0.000960422	0.000166697	0.00635615	0.00925223	0.17547	0.167597	-226.477	-155.43	-7.73202	-8.11782	681	645	623	2507	1114	microglia
CKAP2	80986	0.159694	0.00147793	0.00203653	0.00106645	6.84026	5.22853	3.94865	4.89416	113.584	36.4925	14.4405	28.7365	1109	1950	320	1098	1119.25	monocyte
CD81	12520	0.0277181	6.9537e-14	0.000707288	0.000477234	0.0406991	0.0146231	0.0364173	0.0309547	-34.9502	-98.1596	-39.1177	-46.1084	2535	946	110	888	1119.75	microglia
CCNE1	12447	0.174388	0.00778847	0.00364316	0.00127799	7.49708	6.53244	2.93799	3.62121	179.653	91.5681	6.66345	11.3053	791	988	718	2008	1126.25	monocyte
ABCB4	18670	0.250279	0.00061864	0.00278661	0.00243243	0.0218126	0.00585312	0.198955	0.100177	-65.6417	-245.983	-6.76285	-13.9073	1634	413	706	1755	1127	microglia
CENPA	12615	0.0814317	1.58729e-07	0.000872928	0.00106136	6.26724	5.26779	4.49982	5.24753	76.0243	37.5268	21.6246	36.9896	1472	1912	196	950	1132.5	monocyte
OPHN1	94190	0.0365833	0	0.000709153	8.52715e-05	0.0323349	0.02024	0.0634824	0.0408154	-44.1192	-70.7807	-22.2296	-34.8492	2162	1212	186	975	1133.75	microglia
CLEC2G	70809	0.0597842	3.72772e-10	0.0158906	0.000522322	7.9234	6.48099	1.93893	5.29991	241.762	88.3249	2.83422	38.3942	655	1014	1941	939	1137.25	monocyte
AI607873	226691	0.162631	1.99343e-08	0.00175128	0.00492368	6.32826	5.38389	4.12272	4.98726	79.3516	40.7554	16.4206	30.7187	1431	1802	270	1050	1138.25	monocyte
SYNGR1	20972	0.0136757	1.73958e-08	0.00916417	0.00234766	0.0102094	0.00205404	0.0916611	0.21075	-140.81	-701.869	-15.2447	-6.35769	950	146	297	3160	1138.25	microglia
KIF15	209737	0.0299009	2.462e-05	0.00227446	0.000192176	6.93146	5.06089	4.28242	4.77859	121.061	32.3796	18.4598	26.4473	1055	2122	233	1145	1138.75	monocyte
TLR3	142980	0.174297	3.06447e-05	0.000375721	2.57277e-05	0.0354121	0.0216793	0.0551355	0.0245556	-40.2422	-66.0484	-25.6695	-58.2537	2318	1300	167	770	1138.75	microglia
SLC12A2	20496	0.028516	3.13798e-05	0.00122984	0.00198611	0.0355658	0.019567	0.0705657	0.029787	-40.0662	-73.2322	-19.9488	-47.9354	2326	1179	213	877	1148.75	microglia
ITGA8	241226	0.0673155	2.62859e-06	0.0227278	0.0292161	9.35324	8.33555	2.73168	2.9229	653.043	322.035	5.64228	6.58369	318	323	862	3094	1149.25	monocyte
4930547N16RIK	75317	0.0531101	0.00259946	0.00279947	0.000226112	7.28346	5.3878	3.60749	4.20191	154.79	40.8687	11.1888	17.4035	880	1795	430	1493	1149.5	monocyte
CMKLR1	14747	0.0304794	8.07995e-07	0.00383786	0.00110027	0.0364957	0.0144335	0.0723595	0.049743	-39.0327	-99.4556	-19.4421	-28.5059	2358	927	220	1099	1151	microglia
SEPX1	27361	0.0326965	5.83945e-06	0.000976362	0.000931742	6.39024	5.26319	3.7921	5.14726	82.8794	37.4041	12.8527	34.4388	1377	1916	368	987	1162	monocyte
PALM	18483	0.196094	0.00206335	0.00136058	0.00338852	10.2999	6.16417	2.73908	3.26048	1259.61	70.7132	5.67644	8.58303	180	1214	855	2407	1164	monocyte
KCNE3	57442	0.0463944	0.000739306	0.000528973	0.000232484	9.41667	6.77049	3.08115	3.04184	682.439	108.174	7.46292	7.2354	308	868	647	2839	1165.5	monocyte
PRKCA	18750	0.220939	3.39081e-09	0.00152734	3.20528e-05	0.0280823	0.0103625	0.105504	0.093986	-50.8755	-138.724	-13.1804	-14.8555	1958	705	354	1652	1167.25	microglia
HAVCR2	171285	0.0597842	3.57295e-11	0.000483817	0.000122375	0.0350009	0.0220281	0.0612314	0.0300337	-40.7208	-64.9946	-23.0649	-47.5375	2295	1316	182	879	1168	microglia
CD209A	170786	0.235761	1.85066e-08	0.00849515	0.01564	9.64289	7.2313	3.13523	2.89349	798.464	149.258	7.78616	6.43066	258	667	619	3138	1170.5	monocyte
DPP4	13482	0.0214619	4.39327e-05	0.00961023	0.0137821	9.41225	5.62064	3.58258	3.32505	680.348	48.2019	10.9802	9.02164	310	1591	438	2344	1170.75	monocyte
HSD11B1	15483	0.0214624	0.0164321	0.000467017	0.000801652	7.33567	5.05761	3.70726	4.45954	160.531	32.3037	12.0616	21.0016	856	2128	391	1333	1177	monocyte
MLKL	74568	0.0501852	2.24142e-07	0.00141895	0.000634565	6.85686	5.13438	3.92969	4.59334	114.91	34.1238	14.2389	23.1398	1099	2038	329	1248	1178.5	monocyte
SEMA4A	20351	0.0715861	6.72415e-11	0.000295985	8.43323e-05	5.91073	5.3983	4.4073	5.19231	59.16	41.1745	20.2192	35.5629	1761	1784	209	967	1180.25	monocyte
SEMA4G	26456	0.0851716	0.00213778	0.000528973	0.000170133	0.0180781	0.0187681	0.142002	0.0950651	-79.3045	-76.3706	-9.66788	-14.6814	1433	1135	506	1668	1185.5	microglia
CCNF	12449	0.254613	0.00230197	0.00135715	0.00290358	7.32856	5.21094	4.10739	4.00562	159.737	36.038	16.2364	15.0625	859	1971	276	1645	1187.75	monocyte
MGAT4A	269181	0.00186531	8.43764e-11	0.00039281	7.84739e-05	0.0398204	0.0255108	0.0390204	0.0190894	-35.7323	-56.0538	-36.4751	-75.0766	2504	1433	121	713	1192.75	microglia
NEK2	18005	0.522846	2.45698e-09	0.0139229	0.00741725	9.7419	8.19827	2.73872	2.79935	855.255	292.714	5.67479	5.96127	245	357	856	3321	1194.75	monocyte
COL15A1	12819	0.307311	3.8997e-09	0.000535494	0.000487741	0.00243615	0.00549803	0.293219	0.192318	-591.704	-261.903	-4.43713	-7.01273	348	397	1104	2963	1203	microglia
Sept9	53860	0.0944555	2.3043e-08	4.37936e-05	0.000156311	6.32082	5.28005	3.53069	5.04765	78.9385	37.8557	10.5569	32.0745	1438	1903	460	1015	1204	monocyte
TRPS1	83925	0.0224994	3.70527e-12	0.000358808	0.000327073	6.07125	5.21695	4.26756	5.13648	66.2402	36.1927	18.2603	34.175	1624	1964	238	997	1205.75	monocyte
S100A10	20194	0.0687517	0.00146589	0.000923077	0.000458632	6.56459	4.59088	5.34764	5.91532	93.6539	23.0986	39.7193	59.3515	1270	2681	108	769	1207	monocyte
MELK	17279	0.166455	0.00203224	0.00122984	0.000184913	8.13026	5.29742	3.61944	3.66662	279.189	38.3262	11.2902	11.6988	588	1880	428	1945	1210.25	monocyte
CDC6	23834	0.0885506	0.00138932	0.00216807	0.0196478	7.77069	6.34516	2.73822	3.39189	217.379	80.2989	5.67247	9.49691	696	1093	857	2241	1221.75	monocyte
TARM1	245126	0.0301751	0.00320229	0.00546781		7.02579	5.51648	2.56896		129.309	44.7747	4.93382		1014	1683	983		1226.67	monocyte
5930403N24RIK	320504	0.646311	0.00541337	0.0132418	0.00276415	0.00510406	0.0188644	0.323373	0.1175	-282.157	-75.9781	-3.98006	-11.7851	584	1141	1248	1935	1227	microglia
CDCA2	108912	0.0402921	1.05612e-06	0.00221632	0.00111226	7.04332	5.63921	3.32316	3.82643	130.902	48.8394	9.00852	13.1863	1004	1571	546	1795	1229	monocyte
C330027C09RIK	224171	0.0867367	2.41642e-09	0.00315174	0.000476253	6.44322	4.92311	4.42441	4.80049	86.0165	29.3392	20.4724	26.8671	1347	2262	206	1119	1233.5	monocyte
CCNB2	12442	0.0224015	0.00476339	0.00199377	0.00445462	6.8994	4.89577	4.62908	4.32784	118.378	28.7696	23.7452	19.0821	1071	2294	176	1400	1235.25	monocyte
ITGA4	16401	0.0304794	3.96602e-12	0.00034224	0.000623308	5.14976	5.85818	5.16321	5.61912	34.5004	57.0079	34.8328	48.1499	2552	1417	124	873	1241.5	monocyte
IL7R	16197	0.089807	0.00146102	7.83127e-05	0.000384112	0.0356808	0.0184609	0.0858961	0.0605555	-39.9354	-77.6498	-16.3008	-23.3279	2338	1126	274	1238	1244	microglia
MYL2	17906	0.41227	0.00124985	0.000986724	0.00588184	0.0225224	0.0254038	0.212836	0.0513114	-63.5573	-56.292	-6.29072	-27.6195	1679	1429	765	1104	1244.25	microglia
CYP4F18	72054	0.0114189	4.62061e-10	0.00038747	8.57519e-05	6.07458	5.82356	3.57929	4.20797	66.3955	55.6327	10.9529	17.481	1621	1435	440	1484	1245	monocyte
GABBR1	54393	0.126633	0.00105125	0.000864889	0.000784729	0.0315773	0.0156536	0.157562	0.0682545	-45.1895	-91.6649	-8.66544	-20.641	2113	987	569	1336	1251.25	microglia
CCDC109B	66815	0.0972004	0.00881016	0.00154993	0.00127414	6.39337	4.7386	4.26485	5.32281	83.0615	25.6968	18.2242	39.0244	1375	2501	239	922	1259.25	monocyte
E2F2	242705	0.0348157	2.52735e-05	0.00352096	0.00138749	6.95024	4.88836	3.52623	4.61023	122.66	28.6171	10.5213	23.424	1048	2302	462	1236	1262	monocyte
MLPH	171531	0.0811617	0.00121108	0.000709417	8.52715e-05	0.0138296	0.0114788	0.196322	0.159615	-103.82	-125.184	-6.85997	-8.54779	1183	765	692	2409	1262.25	microglia
MYB	17863	0.421794	3.90914e-05	0.00695403	0.00672815	6.79826	4.93067	3.5376	4.62607	110.296	29.4986	10.6124	23.6936	1132	2250	457	1219	1264.5	monocyte
CLEC4A1	269799	0.0254072	0.000151389	0.00035352	0.00210491	6.53031	5.05208	4.27661	4.28729	91.4312	32.1763	18.3815	18.5256	1287	2132	234	1425	1269.5	monocyte
STAP1	56792	0.0128595	2.84622e-07	0.0013108	0.000244621	6.38788	4.99671	4.17002	4.56487	82.7419	30.9272	17.0011	22.6681	1379	2186	260	1270	1273.75	monocyte
SLFN3	20557	0.13708	7.22004e-05	0.00105929	0.00349869	7.94632	5.52272	3.50641	3.34172	245.65	44.9732	10.3641	9.13811	647	1676	470	2309	1275.5	monocyte
MRC2	17534	0.82503	0.00160047	0.00126405	0.00523791	0.00063746	0.0133396	0.280538	0.198894	-2262.69	-107.652	-4.65879	-6.7651	114	872	1049	3068	1275.75	microglia
OAS3	246727	0.0224015	3.82265e-08	0.0159862	0.0291695	8.39418	6.46636	2.9283	3.03331	335.435	87.4239	6.61211	7.18687	523	1021	720	2852	1279	monocyte
ARHGAP5	11855	0.200796	6.87443e-06	0.00383788	0.000289133	0.0468969	0.0211048	0.0614968	0.0338799	-30.2658	-67.8597	-22.9632	-42.0845	2794	1259	183	904	1285	microglia
SNCAIP	67847	0.242007	0.000150502	0.000528087	0.00130149	0.030125	0.0105843	0.108344	0.12749	-47.3921	-135.806	-12.8221	-10.8235	2046	720	369	2049	1296	microglia
CKAP2L	70466	0.0368368	0.00191582	0.00238424	0.000861145	6.52729	5.12628	3.5296	4.27851	91.2379	33.9272	10.5482	18.407	1290	2050	461	1436	1309.25	monocyte
CCL4	20303	0.254131	0.00968776	0.0210593	0.0244798	0.0462377	0.0169629	0.0884641	0.0537917	-30.7044	-84.5512	-15.8134	-26.3231	2761	1051	286	1146	1311	microglia
ATP1A3	232975	0.138191	3.49423e-11	0.000235146	7.7902e-05	6.10921	5.01778	4.27063	4.56487	68.0327	31.3968	18.3013	22.6681	1601	2164	235	1273	1318.25	monocyte
ERCC6L	236930	0.149492	0.00620734	0.000410926	0.000927648	6.52224	5.40498	3.67126	3.81141	90.9154	41.3702	11.7397	13.0394	1292	1773	410	1808	1320.75	monocyte
FKBP14	231997	0.426894	0	0.00347279	0.00606623	0.0100663	0.0112355	0.318013	0.157149	-142.819	-127.906	-4.05494	-8.68954	939	752	1215	2394	1325	microglia
PSTPIP1	19200	0.16809	6.26309e-09	0.000411097	0.000388732	6.65082	5.09738	3.41693	4.19542	99.4839	33.2346	9.68064	17.3209	1222	2079	504	1498	1325.75	monocyte
PI16	74116	0.0151705	4.73954e-06	0.0018688	0.00114764	6.30711	5.03632	3.70166	4.46641	78.1827	31.8159	12.011	21.1067	1451	2147	397	1316	1327.75	monocyte
CABLES1	63955	0.101332	0.00680851	0.000222778	0.000782501	0.0551044	0.0124948	0.0860317	0.0544247	-25.6843	-114.964	-16.2743	-26.0112	3086	822	275	1154	1334.25	microglia
ARHGAP26	71302	0.00437676	0	0.00023529	0.000284631	6.27856	4.71374	3.98757	5.00974	76.631	25.2408	14.8627	31.2167	1466	2533	307	1032	1334.5	monocyte
TGFBR1	21812	0.0999849	6.03984e-08	0.000864889	6.34329e-06	0.0420334	0.0199016	0.0697925	0.0696714	-33.825	-71.9926	-20.1752	-20.2111	2591	1192	211	1345	1334.75	microglia
GPSM2	76123	0.155856	0.00086215	0.000956764	0.000133742	7.34658	5.53483	3.14301	3.35199	161.757	45.3606	7.83365	9.21054	853	1658	615	2292	1354.5	monocyte
ARHGAP22	239027	0.387313	1.92866e-05	0.000327031	9.62603e-05	0.019267	0.0345967	0.17617	0.0842729	-74.3802	-41.2024	-7.69942	-16.6242	1493	1782	627	1529	1357.75	microglia
LRRC3	237387	0.118549	6.10051e-06	0.00457717	0.00191995	0.00933288	0.000773735	0.344566	0.206808	-154.082	-1864.08	-3.70687	-6.48793	884	57	1359	3131	1357.75	microglia
F630043A04RIK	219114	0.118573	0.00935052	0.00148255	0.0012486	6.47075	4.81817	3.98885	4.29187	87.6933	27.2108	14.8768	18.5876	1328	2381	306	1419	1358.5	monocyte
TTC39C	72747	0.00761326	0.19131	7.83127e-05	0.000545236	9.11236	8.31124	2.4615	2.66942	552.469	316.638	4.50789	5.36172	358	327	1092	3660	1359.25	monocyte
SLC7A8	50934	0.0625833	3.15527e-05	0.00049207	0.000184913	0.0644969	0.0172595	0.0575903	0.0273721	-21.8722	-83.0896	-24.5544	-52.2083	3363	1065	172	858	1364.5	microglia
DLGAP5	218977	0.100876	4.12538e-09	0.00339694	1.98156e-05	4.15612	7.51252	4.1269	6.73585	16.8286	181.597	16.4711	105.584	3972	553	269	677	1367.75	monocyte
RAB3D	19340	0.300641	0.00595197	0.000230369	0.000946213	6.6825	5.02691	3.9597	3.82769	101.715	31.6025	14.5593	13.1987	1207	2159	316	1792	1368.5	monocyte
KCNK13	217826	0.493724	0.00803873	0.00159365	0.00770693	0.0156306	0.0209973	0.43543	0.0442187	-91.8002	-68.2099	-2.83838	-32.1289	1284	1253	1937	1014	1372	microglia
APOC2	11813	0.00159168	0.0292744	0.0044427	5.05908e-08	7.12158	3.93987	5.23516	6.86282	138.255	14.3468	36.6652	115.39	958	3770	120	644	1373	monocyte
TMCC3	319880	0.0419544	2.77429e-09	0.00148327	0.00184367	0.0474975	0.0176528	0.120887	0.0556319	-29.8769	-81.2272	-11.4412	-25.4361	2827	1082	423	1179	1377.75	microglia
CDKN3	72391	0.0878246	0.0121463	0.00164396	0.000284631	5.54174	5.07565	4.40459	4.85383	45.5833	32.7228	20.1794	27.9167	2104	2104	210	1101	1379.75	monocyte
NET1	56349	0.060627	4.77449e-07	0.00440049	0.00518149	7.35478	5.95906	3.11701	3.13373	162.686	61.2092	7.67586	7.77699	851	1370	632	2674	1381.75	monocyte
F2RL2	14064	0.202082	0.00086949	0.00086322	0.0010353	6.99538	5.61907	2.82942	3.4106	126.591	48.1483	6.10789	9.63394	1029	1594	787	2205	1403.75	monocyte
CD97	26364	0.00761326	1.78417e-14	0.00130534	0.000185671	9.21275	6.25707	6.06901	2.52038	592.355	75.483	66.136	4.73733	347	1146	54	4070	1404.25	monocyte
2810055G20RIK	77994	0.0454833	0.00349105	0.00219971		0.0460753	0.0214485	0.0579853		-30.8143	-66.7645	-24.3837		2752	1288	174		1404.67	microglia
NUP210	54563	0.0933651	3.39298e-09	0.00380148	0.00369083	5.31151	5.61614	3.96298	4.40336	38.7122	48.0484	14.5946	20.1614	2369	1596	314	1348	1406.75	monocyte
H2AFX	15270	0.426657	0.0078753	0.00259438	0.00288955	6.72266	4.21181	4.20763	5.26437	104.614	17.5302	17.4766	37.4355	1176	3261	253	943	1408.25	monocyte
2610203C22RIK	72481	0.348051	4.99605e-09	0.0006493	0.00610319	0.0413284	0.0126805	0.129494	0.106331	-34.4105	-113.274	-10.6485	-13.0741	2558	836	455	1805	1413.5	microglia
ABHD6	66082	0.177561	0.00225952	0.00856553	0.0275194	0.0128928	0.0108239	0.147555	0.220744	-111.4	-132.789	-9.28587	-6.04837	1124	733	530	3287	1418.5	microglia
A530064D06RIK	328830	0.132082	0.0187925	0.000378792	0.000543345	4.40646	7.21125	2.96784	5.92799	20.2069	147.185	6.82365	59.8839	3542	676	696	766	1420	monocyte
TACC3	21335	0.165131	1.51981e-10	0.00107703	0.000635654	6.29823	4.65544	3.54017	4.69567	77.6964	24.2016	10.6332	24.9141	1457	2594	456	1190	1424.25	monocyte
ASB2	65256	0.046216	0.000331374	0.00720872		0.0330517	0.0248771	0.187659		-43.1515	-57.4943	-7.1987		2206	1414	666		1428.67	microglia
CYP39A1	56050	0.240103	9.05328e-06	0.00258532	0.0015983	8.27853	6.51055	3.92068	2.59168	309.517	90.1741	14.144	5.02802	553	998	330	3905	1446.5	monocyte
PDLIM4	30794	0.421407	0.00528561	0.00070703	0.000676023	0.0268384	0.0405396	0.157324	0.0681057	-53.2564	-35.0896	-8.67928	-20.6871	1893	1998	568	1334	1448.25	microglia
CDK1	12534	0.359817	0.000887303	0.00310956	0.000955022	6.41007	4.57424	4.01307	4.28896	84.0399	22.8223	15.1456	18.5481	1362	2710	300	1422	1448.5	monocyte
A930024E05RIK	109202	0.658385	0.00713884	0.0022879	0.00109561	0.0196065	0.0158077	0.331124	0.122935	-73.0835	-90.7665	-3.87608	-11.2426	1519	996	1285	2012	1453	microglia
GSR	14782	0.0066362	0.00028359	0.000941963	0.000384112	6.20166	4.81631	3.82571	4.12506	72.6011	27.1743	13.1793	16.4488	1530	2389	355	1549	1455.75	monocyte
EBF3	13593	0.361363	2.85656e-05	0.000804051	0.000184913	0.0323872	0.0118053	0.283336	0.107903	-44.0471	-121.708	-4.60818	-12.8765	2166	784	1065	1830	1461.25	microglia
TGM2	21817	0.82503	0.00738675	0.00139593	0.0124817	0.0162793	0.0263477	0.263784	0.130262	-88.1222	-54.2575	-4.98446	-10.5829	1323	1464	971	2087	1461.25	microglia
PADI4	18602	0.049895	0.19205	0.0009692	0.00207876	8.99432	7.47522	2.72417	2.53631	508.989	176.937	5.60778	4.80105	380	565	869	4035	1462.25	monocyte
SGK1	20393	0.0980856	0	0.00782189	0.00278809	0.0353707	0.0173241	0.158653	0.114238	-40.2899	-82.778	-8.60254	-12.1355	2315	1070	573	1893	1462.75	microglia
KIF2C	73804	0.338909	0.00130512	0.00354232	0.00203948	6.58229	4.60193	3.36532	4.2924	94.8221	23.2839	9.30534	18.5948	1259	2663	529	1417	1467	monocyte
CSRP1	13007	0.111501	7.7529e-05	0.00110373	0.000810567	6.22921	4.57846	3.52545	4.67265	74.0204	22.8921	10.5151	24.5039	1501	2700	463	1206	1467.5	monocyte
CENPK	60411	0.145245	1.20841e-05	0.00179472	0.000529163	6.40508	4.75368	3.57005	4.05732	83.7465	25.9774	10.8766	15.6485	1366	2478	445	1610	1474.75	monocyte
2210020M01RIK	66528	0.113861	0	0.00141333	0.000787165	6.52908	7.27874	2.36568	3.07396	91.3526	154.281	4.15397	7.4208	1288	650	1187	2787	1478	monocyte
FGF11	14166	0.81313	9.49098e-09	0.00383788	0.0165753	0.000754167	0.00259664	0.473844	0.224733	-1912.47	-555.1	-2.57198	-5.93258	128	191	2249	3346	1478.5	microglia
POLE	18973	0.201205	8.84381e-05	0.00560926	0.00571189	6.80304	6.152	2.94581	3.03889	110.665	70.1109	6.70509	7.21858	1130	1225	714	2848	1479.25	monocyte
USP2	53376	0.107663	5.35486e-06	0.000975576	0.000224847	0.0395405	0.0162076	0.190506	0.100057	-35.9888	-88.5142	-7.08397	-13.9246	2488	1011	673	1747	1479.75	microglia
TBC1D16	207592	0.0725992	0.000287374	0.000331394	0.00194453	0.0137716	0.00888612	0.272332	0.208923	-104.259	-161.854	-4.81327	-6.41747	1179	615	1011	3141	1486.5	microglia
PLEC	18810	0.159641	0	0.000664946	0.000922466	7.27966	6.2429	2.62467	2.99842	154.38	74.7357	5.16743	6.99122	882	1158	941	2969	1487.5	monocyte
CDC25B	12531	0.14317	0	0.00205797	0.00838278	6.34809	6.33191	2.27228	3.48878	80.464	79.5552	3.83087	10.2261	1410	1104	1308	2132	1488.5	monocyte
RNF144A	108089	0.0402341	1.23782e-05	0.000418268	0.000210746	7.84141	6.10084	2.89433	2.81671	228.351	67.6334	6.43499	6.04552	679	1263	743	3288	1493.25	monocyte
LPCAT2	270084	0.00761326	9.56681e-11	0.000844275	0.000825092	0.051126	0.0271165	0.0750357	0.0666954	-27.7214	-52.7051	-18.7311	-21.1349	2954	1494	229	1312	1497.25	microglia
GMNN	57441	0.111844	0.00472758	0.00434271	0.00280147	6.65218	4.57957	3.11373	4.23059	99.5784	22.9104	7.65615	17.7731	1221	2699	633	1468	1505.25	monocyte
MAF	17132	0.0147303	3.46883e-08	0.000178615		0.0498221	0.021351	0.100074		-28.4598	-67.0715	-13.9221		2913	1278	336		1509	microglia
SMPDL3A	57319	0.00761326	0.000478566	0.000331394	0.0002168	6.0103	4.49486	4.13498	4.4677	63.4587	21.547	16.5692	21.1265	1681	2821	266	1315	1520.75	monocyte
AIM1	11630	0.0112798	3.1613e-06	0.000750855	0.00103253	6.06522	4.49146	3.76858	4.55811	65.9594	21.4938	12.6287	22.5574	1631	2825	373	1281	1527.5	monocyte
SOCS3	12702	0.0114189	0.00204643	0.0287577	0.000522947	0.0287235	0.0139259	0.208233	0.167371	-49.7287	-103.099	-6.4403	-8.12943	1986	903	742	2503	1533.5	microglia
SPSB1	74646	0.0178302	0.00124581	0.00288244	0.00112212	0.0244454	0.0331293	0.209241	0.113914	-58.5184	-43.0493	-6.40698	-12.1713	1777	1726	748	1885	1534	microglia
RBFOX1	268859	0.362029	3.04316e-08	0.00163666	0.0021249	0.00621664	0.0145838	0.321606	0.221002	-231.57	-98.4252	-4.00447	-6.04071	674	940	1235	3290	1534.75	microglia
GM15448	100041146	0.0257483	0.0115511	0.000152512		9.98868	3.79644	3.71609		1015	12.8944	12.1418		222	4030	385		1545.67	monocyte
GADD45G	23882	0.304278	0.0175931	0.00834091	0.00546542	0.00794451	0.0293533	0.300464	0.17519	-181.097	-48.651	-4.3189	-7.74516	786	1576	1139	2693	1548.5	microglia
ATP10A	11982	0.0178302	0.00205608	0.00267346	0.00206236	7.97206	5.0517	3.04245	3.06925	250.09	32.1676	7.23888	7.39336	641	2133	661	2794	1557.25	monocyte
SH3BGRL	56726	0.0561042	0.000428882	0.000543397	0.000193681	5.93554	4.57445	3.96289	4.20023	60.2035	22.8257	14.5937	17.3821	1737	2708	315	1494	1563.5	monocyte
CNN2	12798	0.0401066	0.00263689	0.000637937	0.00055204	5.60955	4.58723	3.89603	4.61738	47.8251	23.0377	13.8875	23.5454	2035	2687	338	1228	1572	monocyte
ARHGAP15	76117	0.059354	6.26467e-13	0.000792743	0.00096512	6.01296	4.47744	3.69193	4.35645	63.5775	21.2764	11.9236	19.4844	1676	2847	402	1369	1573.5	monocyte
LRRC8C	100604	0.0380161	3.52293e-05	0.00193475	0.00236049	5.6318	4.32367	3.8486	5.58311	48.5838	19.0241	13.406	46.9383	2020	3054	347	881	1575.5	monocyte
FPR2	14289	0.0174849	0.00131861	0.0130663	0.0189855	8.3495	4.92369	3.88481	2.8598	325.174	29.3513	13.7722	6.25914	536	2260	342	3189	1581.75	monocyte
MAP4K1	26411	0.258031	0.00632807	0.000635045	0.000309669	6.74481	4.82764	3.31091	3.37877	106.248	27.3965	8.92394	9.40189	1159	2368	550	2251	1582	monocyte
AURKA	20878	0.403033	3.11324e-05	0.00188082	0.000510864	6.33818	4.74397	3.26585	3.77328	79.9061	25.7964	8.61878	12.6732	1422	2489	572	1845	1582	monocyte
TIAM2	24001	0.131773	0.0146782	0.00367442	0.00145241	6.71281	5.7615	2.2038	3.37447	103.895	53.2482	3.60692	9.37091	1182	1481	1401	2267	1582.75	monocyte
UPB1	103149	0.101184	0	0.00878898	0.0175381	5.1165	7.93471	2.04145	3.98163	33.6913	243.673	3.11658	14.7976	2601	418	1694	1658	1592.75	monocyte
STOM	13830	0.0991523	0.000742359	0.00159281	0.000923799	6.02939	4.48169	3.82431	4.16205	64.3171	21.342	13.1655	16.902	1662	2839	356	1516	1593.25	monocyte
ELAVL4	15572	0.185598	5.14658e-05	0.00186903	0.0368722	0.0159926	0.00542421	0.358723	0.217613	-89.711	-265.474	-3.54245	-6.14221	1306	392	1433	3248	1594.75	microglia
LYZ2	17105	0.207469	1.1795e-11	0.000636473	9.78563e-05	8.06591	6.75773	2.27885	2.68184	266.968	107.213	3.85291	5.41672	607	874	1297	3610	1597	monocyte
SLC46A1	52466	0.159209	0.000964104	0.00272418	0.00133249	0.0984566	0.0164612	0.072569	0.0253235	-14.1588	-87.1433	-19.3845	-56.4721	4381	1023	221	773	1599.5	microglia
ITGB5	16419	0.0367654	2.57216e-05	0.000377264	0.000139426	0.0529802	0.0423595	0.0694444	0.0517606	-26.7339	-33.5608	-20.2788	-27.3754	3021	2067	208	1112	1602	microglia
CYP2AB1	224044	0.172394	3.34397e-05	0.000436829	0.00012752	9.46949	6.11806	2.68653	2.55267	707.927	68.4575	5.43761	4.86718	296	1247	895	4013	1612.75	monocyte
DOCK9	105445	0.0823744	6.64903e-08	0.00159863	0.000523361	0.0468708	0.0261738	0.13944	0.101839	-30.283	-54.6214	-9.85442	-13.6724	2790	1451	492	1765	1624.5	microglia
SOX4	20677	0.131764	0.000362012	0.00023529	7.31604e-05	0.0510152	0.0231913	0.217885	0.0754673	-27.7827	-61.7097	-6.13393	-18.6212	2949	1361	782	1414	1626.5	microglia
ZCCHC14	142682	0.0263505		0.00303141	0.00198231	0.0283265		0.221072	0.13348	-50.4325		-6.03868	-10.3161	1969		796	2116	1627	microglia
TRIM2	80890	0.0142554	0	0.00436085	0.00254241	0.017907	0.00896277	0.288533	0.227684	-80.0672	-160.466	-4.51675	-5.84951	1416	625	1089	3382	1628	microglia
2810417H13RIK	68026	0.0763082	1.16041e-06	0.00123251	0.000184913	5.37402	4.27441	4.8296	5.31781	40.4708	18.3519	27.435	38.886	2304	3131	158	926	1629.75	monocyte
MIS18BP1	217653	0.0144392	2.20029e-10	0.00157094	0.000265214	6.15641	4.5914	3.97456	3.64526	70.3287	23.1073	14.7204	11.5122	1562	2679	310	1982	1633.25	monocyte
TTC8	76260	0.498128	9.89097e-08	0.00219179	0.00131628	0.0274049	0.00750659	0.342948	0.179036	-52.1454	-191.691	-3.72654	-7.56849	1922	528	1349	2747	1636.5	microglia
KIF20A	19348	0.245368	0.000257161	0.00248226	0.00293744	6.57147	5.50377	3.29502	2.9665	94.1062	44.3732	8.81518	6.81635	1267	1694	554	3051	1641.5	monocyte
PRKAR2B	19088	0.168803	0.000115436	0.00149805	0.000683923	6.66829	4.93902	3.58683	3.12219	100.708	29.6757	11.0155	7.7071	1212	2245	437	2705	1649.75	monocyte
MRAS	17532	0.0870464	9.23302e-05	0.00164118	0.00205058	0.0171335	0.0344462	0.238897	0.170729	-83.7042	-41.3845	-5.55278	-7.96005	1368	1772	879	2619	1659.5	microglia
COL27A1	373864	0.0301751	1.00319e-08	0.00306369	0.000933346	0.00681653	0.00503299	0.449686	0.237121	-211.147	-286.148	-2.73416	-5.5979	705	362	2047	3524	1659.5	microglia
DPEP2	319446	0.00883174	1.2435	0.00224769	0.00394988	5.68259	5.72815	2.56183	3.44422	50.3605	52.0085	4.90457	9.88461	1973	1513	990	2164	1660	monocyte
ABCA1	11303	0.0861238	0.000226599	0.00371982	0.00219486	0.0639276	0.0325933	0.116893	0.0576692	-22.0713	-43.7655	-11.8487	-24.5201	3346	1702	406	1204	1664.5	microglia
FXYD5	18301	0.00576189	0.00787267	0.000655066	0.000264469	5.76291	4.25687	3.96923	4.50128	53.3011	18.1181	14.6624	21.6475	1891	3173	312	1299	1668.75	monocyte
IL21R	60504	0.0555884	4.46061e-05	0.00310214	0.00148374	0.0790963	0.0292269	0.121336	0.0308307	-17.7443	-48.8636	-11.3971	-46.2958	3854	1570	425	882	1682.75	microglia
SLC22A15	242126	0.135537	3.57225e-06	0.000250443	0.000711964	8.31294	5.29464	2.6226	2.78629	317.014	38.2506	5.1586	5.89855	548	1884	945	3367	1686	monocyte
SLFN5	327978	0.0551532	5.6972e-05	0.00877425	0.0105719	5.27788	4.57078	3.93361	4.52096	37.7973	22.7652	14.2804	21.9585	2411	2714	327	1295	1686.75	monocyte
GMPR	66355	0.404846	0.021366	0.00498243	0.0100381	0.0332098	0.0301342	0.218186	0.134752	-42.9438	-47.3774	-6.12483	-10.2141	2216	1612	783	2138	1687.25	microglia
BCO2	170752	0.0917787	0.013742	0.00100038	0.000689354	0.0612209	0.0418432	0.109412	0.0468393	-23.0689	-33.9811	-12.6922	-30.3036	3273	2046	372	1064	1688.75	microglia
1700020L24RIK	66330	0.0373084	0.0201455	0.00339442	0.00604286	6.72115	6.35627	2.17572	2.96441	104.504	80.9274	3.51811	6.80504	1178	1087	1445	3052	1690.5	monocyte
BRIP1	237911	0.080561	7.9433e-06	0.00186903	0.000139426	5.24531	4.97329	3.65867	3.93432	36.9311	30.413	11.629	14.2879	2450	2212	414	1697	1693.25	monocyte
CAPNS2	69543	0.572438	0.00119314	0.00617566	0.000825092	0.0722399	0.0247303	0.119886	0.0666954	-19.4751	-57.8387	-11.5408	-21.1349	3636	1411	420	1313	1695	microglia
NCAM1	17967	0.197599	3.30816e-10	0.00186123	0.000703859	13.3109	10.3338	1.83105	2.42155	10160.7	1289.58	2.55796	4.35745	25	88	2278	4422	1703.25	monocyte
FCHO1	74015	0.0301751	0.12242	0.00253637	0.00669369	8.13129	7.3043	2.17186	2.49972	279.39	157.057	3.50603	4.65577	587	639	1454	4141	1705.25	monocyte
GM10712	100502877	0.0559867	3.43723e-08	0.00186229	5.05908e-08	4.52189	5.99292	2.0311	6.86282	21.9734	62.6868	3.08717	115.39	3352	1344	1717	429	1710.5	monocyte
RNASE4	58809	0.0196158	0.000647237	0.000407836	0.000675396	0.055127	0.032027	0.0819495	0.107111	-25.6736	-44.548	-17.1094	-12.9753	3087	1688	258	1823	1714	microglia
D18ERTD653E	52662	0.290008	0.000391761	0.00223472	0.00588055	0.063508	0.0375168	0.143431	0.0548568	-22.2204	-37.9568	-9.56672	-25.8024	3335	1898	511	1157	1725.25	microglia
KLF8	245671	0.222141	0.00032738	0.0072025	0.00946356	8.23521	6.95401	2.10442	2.55024	300.332	122.984	3.30025	4.85731	564	775	1570	4015	1731	monocyte
AHR	11622	0.0280657	0.000993012	0.00131632	0.00318526	7.72726	5.53345	2.81893	2.62782	210.902	45.3163	6.05637	5.18091	706	1659	793	3813	1742.75	monocyte
CDKN2D	12581	0.0110653	0.0127753	0.00207545		5.47153	4.75841	3.22381		43.3705	26.0659	8.34248		2197	2473	589		1753	monocyte
IMPA2	114663	0.216733	0.0315304	0.00049207	9.16805e-05	6.46748	5.13265	2.84985	3.03053	87.492	34.0818	6.20928	7.17111	1336	2039	776	2863	1753.5	monocyte
DRAM1	71712	0.111736	1.40225e-05	0.000368324	0.000397631	6.58586	5.12624	3.17247	2.91401	95.0599	33.9263	8.01587	6.53708	1255	2051	606	3111	1755.75	monocyte
CTNNAL1	54366	0.0883944	3.37593e-06	0.00223111	0.00121037	0.0212768	0.0216381	0.224759	0.221705	-67.3071	-66.1752	-5.93182	-6.02007	1611	1297	814	3306	1757	microglia
ITGA6	16403	0.108029	5.49043e-13	2.15605e-05	2.04161e-07	0.0844383	0.0329177	0.0816718	0.0479032	-16.5907	-43.3292	-17.1693	-29.6196	4006	1718	256	1076	1764	microglia
MYO1E	71602	0.068173	0.0002515	0.00428611	0.00356211	0.0228331	0.014233	0.286848	0.226357	-62.6858	-100.864	-4.54603	-5.88661	1694	919	1082	3370	1766.25	microglia
ANG	11727	0.0066362	0.00143268	0.00139593	0.000675396	0.0535108	0.0340651	0.128397	0.107111	-26.4639	-41.853	-10.7436	-12.9753	3043	1754	451	1824	1768	microglia
3222401L13RIK	320513	0.601119	0.00135821	0.0340576	0.000139426	0.0144352	0.0088094	0.210963	0.300209	-99.4435	-163.268	-6.35079	-4.32296	1223	609	755	4489	1769	microglia
CASC4	319996	0.0386261	8.70454e-10	0.00102028	0.00100356	0.0528393	0.0126581	0.241398	0.152692	-26.8065	-113.474	-5.49036	-8.95724	3011	835	885	2355	1771.5	microglia
B3GALT5	93961	0.0304794	2.65619e-06	0.00383788	0.00266515	0.0158306	0.0200101	0.380043	0.19828	-90.634	-71.5997	-3.31807	-6.78749	1295	1197	1555	3059	1776.5	microglia
PFKP	56421	0.0300182	2.75468e-08	5.07602e-05	2.96404e-05	6.00188	4.36327	3.58191	3.62929	63.0833	19.5813	10.9746	11.3744	1690	2994	439	1996	1779.75	monocyte
KCND1	16506	0.00466408	0.012646	0.00841075	0.00705801	0.0505822	0.0522577	0.169405	0.0570061	-28.0247	-27.1103	-8.02603	-24.811	2937	2397	604	1194	1783	microglia
NID2	18074	0.310276	0.00208473	0.00196486	0.00159229	0.0206628	0.012324	0.311889	0.240963	-69.3221	-116.564	-4.14366	-5.50112	1576	813	1190	3559	1784.5	microglia
AP1S3	252903	0.020329	0.00139392	0.000637817	0.0187853	4.7999	5.92809	2.97555	3.44021	26.8557	59.888	6.86555	9.85443	3010	1381	691	2168	1812.5	monocyte
MCM5	17218	0.108079	0.0116277	0.003657	0.00281021	6.13137	4.21022	3.32792	3.76218	69.1014	17.5099	9.04159	12.5684	1585	3265	543	1864	1814.25	monocyte
PYGL	110095	0.0768044	0.00253939	4.64827e-05	2.76794e-05	5.73218	4.24453	3.56566	3.937	52.1567	17.9553	10.8405	14.3163	1921	3197	447	1696	1815.25	monocyte
6330512M04RIK	320802	0.452858	3.96268e-08	0.00259768	0.00666692	0.00297105	0.0547161	0.361046	0.191829	-485.084	-25.8701	-3.51671	-7.0318	396	2483	1447	2954	1820	microglia
DNA2	327762	0.0272549	6.72974e-10	0.00112286	0.000635654	5.255	4.51929	3.54468	4.03133	37.1867	21.9319	10.6696	15.3513	2434	2781	454	1620	1822.25	monocyte
FGR	14191	0.0350583	2.82529e-05	0.00113565	0.00101241	4.8724	4.23477	4.15981	5.38875	28.2912	17.8275	16.8742	40.8964	2918	3222	263	911	1828.5	monocyte
TMEM8	60455	0.189082	0.00463427	0.00251579	0.00232859	7.01953	6.1973	2.27444	2.62753	128.744	72.3795	3.83809	5.17965	1016	1187	1304	3816	1830.75	monocyte
INCENP	16319	0.192767	1.40563e-05	0.00196375	0.00131746	5.60685	4.34266	3.2535	3.94766	47.7338	19.2894	8.5368	14.4299	2040	3026	576	1684	1831.5	monocyte
ANXA5	11747	0.0570139	0.00139903	0.000841512	0.000379479	5.49317	4.18852	3.79979	4.16879	44.0412	17.2335	12.9268	16.9858	2167	3307	362	1514	1837.5	monocyte
CXXC5	67393	0.227687	0.007769	0.000993167	0.000610974	0.0934375	0.0299561	0.130141	0.0479726	-14.9456	-47.6621	-10.5932	-29.5761	4260	1605	459	1079	1850.75	microglia
DAB2	13132	0.119528	0.000568125	0.00139129	0.000246079	0.0505132	0.0454629	0.15664	0.102192	-28.0637	-31.2361	-8.71931	-13.6234	2934	2167	562	1768	1857.75	microglia
EML2	72205	0.0612938	0.0136531	0.00650573	5.05908e-08	5.86343	4.85291	1.72451	6.86282	57.2197	27.8983	2.30469	115.39	1799	2339	2717	594	1862.25	monocyte
KIF20B	240641	0.0346965	9.68656e-07	0.00471523	0.000769035	5.21795	4.39793	3.70101	4.00888	36.2186	20.0819	12.0051	15.0988	2479	2938	398	1639	1863.5	monocyte
GLRP1	14659	0.601119	0.000870246	0.0126848	0.00451106	0.0203267	0.0117158	0.394351	0.235157	-70.4767	-122.641	-3.18115	-5.6486	1560	778	1636	3489	1865.75	microglia
ENTPD1	12495	0.0698918	2.92561e-11	0.000860283	0.000293185	0.0633508	0.0486866	0.103388	0.0820885	-22.2768	-29.1351	-13.4602	-17.0796	3333	2273	346	1512	1866	microglia
SNX24	69226	0.484136	0.045637	0.000153099	0.000144912	0.0749002	0.0454997	0.0967336	0.0619582	-18.7659	-31.2104	-14.4197	-22.7886	3718	2171	322	1258	1867.25	microglia
LPCAT4	99010	0.267662	0.00172209	0.000606418	0.000363619	6.21841	4.22062	3.25627	3.44705	73.4609	17.6437	8.55507	9.90602	1508	3244	575	2160	1871.75	monocyte
CMPK2	22169	0.028516	0.00918292	0.000528087	0.00402855	5.70832	4.37774	2.88462	3.78862	51.285	19.7888	6.3851	12.8194	1945	2971	752	1838	1876.5	monocyte
DUT	110074	0.1285	0.0117306	0.0018688	0.00117458	5.7026	4.04072	3.36655	4.25112	51.078	15.458	9.31411	18.0421	1949	3579	526	1457	1877.75	monocyte
KIF22	110033	0.187754	1.6736e-06	0.00159213	0.00179335	7.63166	5.78422	3.51784	2.302	197.317	54.109	10.4545	3.9314	752	1466	468	4887	1893.25	monocyte
RGS7BP	52882	0.0991523	0.00138237	0.00772569	0.0111277	0.00873456	0.00676121	0.33273	0.330796	-164.671	-212.879	-3.85514	-3.88038	842	474	1296	4969	1895.25	microglia
CLEC10A	17312	0.0304794	5.16943e-05	0.00505666	0.0004986	5.18337	4.55226	3.01302	3.96365	35.3369	22.4621	7.0725	14.6019	2517	2735	674	1672	1899.5	monocyte
PDE3B	18576	0.0805622	8.49414e-05	0.00130534	0.000290875	0.0860484	0.0381182	0.0875573	0.0703631	-16.2711	-37.3501	-15.9822	-20.0076	4052	1920	284	1352	1902	microglia
PLEKHH2	213556	0.150676	0.000428981	0.00145936	0.00203286	0.00748593	0.00907608	0.329485	0.329461	-192.221	-158.456	-3.89766	-3.89796	762	632	1276	4947	1904.25	microglia
ANKS6	75691	0.291994	0.0294081	0.00172291	0.000635654	0.0252416	0.0363675	0.326317	0.177795	-56.6569	-39.172	-3.93998	-7.62464	1814	1846	1256	2720	1909	microglia
TMEM150B	330460	0.0324145	0.506187	0.0016883	5.05908e-08	5.08601	3.66532	3.5491	6.86282	32.9657	11.6873	10.7054	115.39	2641	4326	452	226	1911.25	monocyte
BTLA	208154	0.00186935	2.35948e-08	0.0031921	0.000736185	4.79691	4.42232	3.42166	4.59993	26.798	20.4412	9.71577	23.2503	3012	2904	501	1239	1914	monocyte
GGT5	23887	0.233746	0.00213213	0.000637817	0.00050074	0.0338702	0.021065	0.266062	0.21308	-42.0968	-67.9889	-4.93777	-6.28299	2249	1258	981	3182	1917.5	microglia
MYBL2	17865	0.280249	0.0341777	0.00335596	0.00261895	5.87245	5.09226	3.0577	2.89917	57.5848	33.1132	7.32646	6.45999	1794	2086	656	3135	1917.75	monocyte
GPR155	68526	0.0304794	5.2227e-06	0.00252262		0.0656956	0.0399395	0.107839		-21.4641	-35.6243	-12.8844		3403	1986	365		1918	microglia
CLSTN1	65945	0.693887	0.0020508	0.00110957	0.000594466	0.0418975	0.0328262	0.223101	0.170547	-33.9363	-43.4514	-5.97943	-7.96907	2584	1711	810	2611	1929	microglia
ADAP2	216991	0.0463944	0.000955237	9.09837e-07	0.000149181	0.0881754	0.0521183	0.0827696	0.0414264	-15.8668	-27.1842	-16.935	-34.3279	4110	2386	261	993	1937.5	microglia
CD34	12490	0.0888656	0.00206874	0.00200289	0.001075	0.0850169	0.0401094	0.094002	0.0765267	-16.4744	-35.4713	-14.8529	-18.3566	4019	1989	308	1438	1938.5	microglia
ZC3H12D	237256	0.0304794	0.00119222	0.00765802	0.00941964	7.19232	5.32416	2.38313	2.61797	145.253	39.0621	4.21667	5.13885	927	1850	1170	3824	1942.75	monocyte
LANCL2	71835	0.089286	9.92869e-05	0.000566422	0.000139426	5.5447	4.39647	3.18129	3.43539	45.6791	20.0606	8.07117	9.81822	2099	2943	600	2178	1955	monocyte
TREM2	83433	0.0418731	0.000325786	0.00307045	0.00249361	0.0564945	0.052669	0.108549	0.116216	-25.0402	-26.8948	-12.797	-11.9207	3127	2413	371	1916	1956.75	microglia
RAD51	19361	0.169691	0.000193149	0.00196919	0.00104633	6.19622	4.24142	2.86276	3.3021	72.3245	17.9145	6.27408	8.86347	1534	3205	768	2362	1967.25	monocyte
SMC4	70099	0.221808	3.82987e-08	0.00129314	0.000459947	4.70619	4.19426	4.33216	4.59638	25.1038	17.3062	19.1423	23.1907	3123	3296	222	1244	1971.25	monocyte
CDK5R1	12569	0.0435683	0.000876123	0.00209542	0.00261525	0.0600094	0.0271403	0.268138	0.140903	-23.5446	-52.6585	-4.8959	-9.74706	3239	1497	993	2202	1982.75	microglia
ZFP37	22696	0.391691	0.000856067	0.00154993	0.00120279	0.0163697	0.0265789	0.268182	0.283067	-87.6329	-53.7812	-4.89501	-4.61299	1330	1469	994	4166	1989.75	microglia
SLC39A12	277468	0.598831	0.0157057	0.000851083	0.0107737	0.0196791	0.0341573	0.337199	0.227416	-72.8121	-41.7388	-3.79793	-5.857	1525	1758	1320	3380	1995.75	microglia
PRIM1	19075	0.0174849	0.000250664	0.00325008	0.00120806	5.35062	4.03765	3.70718	3.97982	39.8036	15.423	12.0609	14.7778	2341	3588	392	1664	1996.25	monocyte
ARHGAP19	71085	0.203676	0.017525	0.00252308	0.0013502	5.36423	3.71967	3.64262	4.94431	40.1902	12.1744	11.4893	29.7884	2322	4174	422	1074	1998	monocyte
SPNS2	216892	0.107951	0.0130902	0.00224769	0.0128775	0.0330887	0.0218283	0.336085	0.216815	-43.1028	-65.5941	-3.81204	-6.16654	2208	1306	1315	3236	2016.25	microglia
LSP1	16985	0.148773	0	0.00035352	0.000139426	5.26871	4.95485	2.82995	3.14856	37.5515	30.014	6.1105	7.86771	2419	2225	785	2638	2016.75	monocyte
ACE	11421	0.0723604	0.000112594	0.00307405	0.00699993	6.00661	5.42389	2.72444	2.63246	63.2938	41.9293	5.60904	5.20082	1685	1752	868	3797	2025.5	monocyte
HEXB	15212	0.027341	4.95122e-07	0.00358712	0.000380442	0.0414665	0.0215295	0.194575	0.241287	-34.2943	-66.5113	-6.92583	-5.49309	2566	1292	685	3569	2028	microglia
MS4A6C	73656	0.0243464	0.0226355	0.00139129	0.00153754	5.7442	3.94243	3.68725	3.57934	52.6014	14.3741	11.8817	10.9533	1910	3763	405	2036	2028.5	monocyte
VILL	22351	0.146191	0.00448667	0.00122073	0.000596625	7.39915	4.99446	1.94587	2.87145	167.798	30.8774	2.85269	6.318	829	2190	1925	3174	2029.5	monocyte
D8ERTD82E	244418	0.477046	1.01075e-06	0.00189466	0.00111226	0.0787889	0.0229026	0.226363	0.132391	-17.8154	-62.494	-5.88643	-10.4049	3845	1351	821	2110	2031.75	microglia
SCOC	56367	0.0144289	0.000212924	0.0148626	0.0138001	0.071776	0.0441411	0.202467	0.0946134	-19.6041	-32.1862	-6.63727	-14.7538	3615	2131	719	1666	2032.75	microglia
CAPN2	12334	0.0137723	0.000896056	0.000483817	0.000844029	4.84003	4.00879	4.00896	4.59646	27.6414	15.0978	15.0997	23.1921	2962	3636	301	1242	2035.25	monocyte
FBLIM1	74202	0.555787	0.0260177	0.0143864	0.0241691	0.01366	0.0369669	0.300556	0.266162	-105.115	-38.5288	-4.31743	-4.93574	1168	1873	1142	3969	2038	microglia
SNTA1	20648	0.177357	0.00143829	0.00112423	0.000386558	0.0323009	0.0261546	0.350274	0.212416	-44.1661	-54.6619	-3.63898	-6.30409	2159	1450	1387	3180	2044	microglia
DIAP3	56419	0.0301751	0.00518786	0.00303364	0.00159237	5.85839	4.15484	3.34948	3.19924	57.0165	16.8127	9.19279	8.18472	1805	3379	536	2488	2052	monocyte
BC006779	229003	0.00259053	8.33314e-07	0.00878461	0.00666467	5.97496	4.45136	2.51923	3.17091	61.8988	20.8773	4.73277	8.00612	1710	2869	1031	2602	2053	monocyte
CD209D	170779	0.0218101	0.431238	0.00747417	0.0137247	9.6172	7.34098	1.88498	2.20518	784.356	161.127	2.69348	3.61132	264	621	2097	5263	2061.25	monocyte
PLCL1	227120	0.0401066	5.63106e-05	0.00617175		0.0648781	0.0362128	0.266157		-21.7408	-39.3414	-4.93584		3376	1838	982		2065.33	microglia
CLCF1	56708	0.0540278	0.00125986	0.000750855	0.000940036	0.099955	0.0347243	0.196437	0.0729309	-13.9392	-41.0492	-6.85566	-19.2859	4420	1788	693	1395	2074	microglia
TLN2	70549	0.129473	4.228e-07	0.000877172	0.000618341	0.0579786	0.018151	0.395719	0.156705	-24.3866	-78.9842	-3.16858	-8.71554	3168	1113	1647	2378	2076.5	microglia
RUNX3	12399	0.0176802	0.000411143	0.00155284	0.000927648	4.88494	6.2466	2.20726	3.03255	28.547	74.93	3.61796	7.18254	2908	1155	1394	2860	2079.25	monocyte
MYO6	17920	0.209521	3.1747e-09	0.000242502	1.8314e-05	0.033675	0.0150132	0.360754	0.247832	-42.3436	-95.5958	-3.51992	-5.33557	2240	957	1444	3684	2081.25	microglia
TCF7L2	21416	0.0257483	8.42968e-11	0.000405597	6.33327e-06	0.0802021	0.0541235	0.23869	0.0535262	-17.4929	-26.1588	-5.55799	-26.4561	3891	2457	877	1127	2088	microglia
ZWILCH	68014	0.0945474	0.00225114	0.0157681	0.00655092	6.33612	3.67727	3.0344	3.57483	79.7911	11.7929	7.19303	10.916	1424	4285	667	2039	2103.75	monocyte
ATP2B4	381290	0.0503803	0.00576028	0.00141592	0.000379479	6.26679	4.52292	2.85519	2.76664	76.0001	21.9898	6.23597	5.80519	1473	2775	774	3415	2109.25	monocyte
SESTD1	228071	0.018179	0.0152715	0.000339197	6.69683e-05	5.09999	4.10827	3.04798	3.81891	33.2966	16.247	7.27051	13.1126	2621	3461	659	1800	2135.25	monocyte
FGF13	14168	0.499612	1.79497e-06	0.017416	0.0206155	0.0148837	0.0103133	0.404681	0.326522	-96.4319	-139.388	-3.08836	-3.93721	1245	703	1716	4879	2135.75	microglia
AC155307		0.0386261	0.0481715		0.000327073	5.81044	4.05095		5.13648	55.1199	15.5751		34.175	1853	3561		996	2136.67	monocyte
MAD2L1	56150	0.111766	0.000320719	0.00102804	0.000619308	5.45385	3.59307	3.70749	4.17657	42.83	11.0676	12.0637	17.0831	2219	4468	390	1508	2146.25	monocyte
RIC3	320360	0.0229683	2.48208e-09	0.00176497	0.00111316	0.0131348	0.00981861	0.44989	0.317816	-109.339	-146.435	-2.73272	-4.05776	1139	679	2049	4737	2151	microglia
GYPC	71683	0.300641	0.0080209	0.00891031	0.00703904	7.93518	5.21959	1.83486	2.64783	243.753	36.2608	2.56737	5.26724	650	1960	2259	3739	2152	monocyte
XRCC5	22596	0.170959	0.0125732	0.000708862	0.00133137	0.0934763	0.0373078	0.18175	0.109456	-14.9392	-38.1722	-7.44831	-12.687	4261	1889	649	1844	2160.75	microglia
HAL	15109	0.0716587	0.0213683	0.00121042	0.0013208	7.60876	4.6293	2.7782	2.41431	194.193	23.749	5.85997	4.33066	760	2625	826	4443	2163.5	monocyte
KHDRBS3	13992	0.142475	0.00268209	0.000580822	0.0113412	0.0319782	0.00877308	0.277162	0.326781	-44.6168	-163.946	-4.72123	-3.93372	2135	608	1036	4886	2166.25	microglia
CRYBB1	12960	0.357353	0.0260256	0.000580822	0.000172313	0.0768672	0.0590063	0.183405	0.0923988	-18.2731	-23.9532	-7.37677	-15.1191	3784	2611	652	1633	2170	microglia
SERPINF1	20317	0.0588961	0.00161064	0.000368324	0.000156311	0.0855392	0.0456277	0.165959	0.113095	-16.3708	-31.1215	-8.20264	-12.263	4038	2176	594	1883	2172.75	microglia
CKS1B	54124	0.150676	0.00230727	0.00256372	0.0014686	4.35196	4.03937	3.83052	4.79718	19.4206	15.4427	13.2266	26.8032	3644	3583	352	1121	2175	monocyte
FLOT2	14252	0.437732	8.00773e-05	0.000239423	0.000614352	5.20871	3.85998	2.75606	4.22942	35.981	13.5201	5.75547	17.7578	2489	3910	843	1470	2178	monocyte
CERKL	228094	0.0334018	0.00783167	0.0117167	0.000623308	5.18014	3.86539	2.18564	5.61912	35.2558	13.5747	3.54929	48.1499	2524	3899	1429	875	2181.75	monocyte
GIMAP6	231931	0.0167807	0.0166797	0.00847553	0.00943457	0.0517688	0.0701214	0.220499	0.124337	-27.3711	-20.0783	-6.05558	-11.1103	2984	2940	794	2024	2185.5	microglia
RILPL2	80291	0.282696	0.00115726	0.0150822	0.0435734	4.68951	6.07254	2.54906	2.79733	24.8037	66.3004	4.85254	5.95154	3137	1296	1008	3324	2191.25	monocyte
MYLIP	218203	0.0867563	0.00198173	0.00105367	0.000408402	0.0990925	0.0483945	0.139476	0.090999	-14.0648	-29.3139	-9.85171	-15.3592	4399	2263	493	1619	2193.5	microglia
ADORA3	11542	0.0987665	0.012898	0.000239423	0.000800539	0.107263	0.0524839	0.119872	0.0747067	-12.9563	-26.9913	-11.5422	-18.8158	4635	2404	419	1405	2215.75	microglia
LIG1	16881	0.119213	0.000168944	0.00364371	5.05908e-08	4.65822	3.57838	2.86045	6.86282	24.2501	10.9454	6.26241	115.39	3180	4496	771	426	2218.25	monocyte
CACNB2	12296	0.49156	8.76463e-10	0.00130507	0.000224847	0.0692784	0.0477209	0.284611	0.127694	-20.3286	-29.7347	-4.58543	-10.8054	3528	2242	1070	2052	2223	microglia
INF2	70435	0.0885506	0.00193589	0.000958464	0.000631225	6.76463	4.82953	2.45875	2.46252	107.732	27.4336	4.4974	4.51178	1146	2364	1093	4298	2225.25	monocyte
GOLM1	105348	0.0233155	5.92881e-05	0.00155284	0.000994412	0.105384	0.0521788	0.100263	0.0875485	-13.1959	-27.1521	-13.8949	-15.9839	4579	2392	337	1597	2226.25	microglia
6330403L08RIK	70744	0.0188828	0.00553491	0.0108655	0.00181909	0.0321853	0.0155384	0.430394	0.259769	-44.3266	-92.3479	-2.87685	-5.06877	2152	980	1898	3882	2228	microglia
PYHIN1	236312	0.0373865	0.0105152	0.0003873		5.22671	3.87596	3.9116		36.4453	13.6818	14.049		2474	3879	333		2228.67	monocyte
HEBP1	15199	0.0978953	0.0494123	0.0296852	0.0376052	0.0598632	0.0368141	0.34484	0.164092	-23.6033	-38.6908	-3.70357	-8.30147	3233	1868	1360	2468	2232.25	microglia
PPM1L	242083	0.43892	1.30566e-06	0.00295676	0.00138332	0.0432298	0.0246339	0.339436	0.240265	-32.8752	-58.0668	-3.76986	-5.51845	2645	1405	1330	3555	2233.75	microglia
AC134437		0.436136	0.00286455	0.00830745	0.00200772	0.0291579	0.0104779	0.300097	0.340006	-48.9804	-137.19	-4.32475	-3.76276	2009	713	1137	5102	2240.25	microglia
CD9	12527	0.0807456	0.000428821	0.00163666	0.00291267	0.116358	0.0362292	0.0867092	0.119354	-11.9055	-39.3234	-16.1433	-11.5944	4886	1839	280	1962	2241.75	microglia
FERT2	14158	0.154555	0.00248807	0.00396275	0.000377807	0.104216	0.0499359	0.190069	0.0761601	-13.3493	-28.3938	-7.10135	-18.4473	4551	2315	672	1430	2242	microglia
PTPN22	19260	0.011489	0.00012654	0.00203906	0.00134186	4.56274	4.1311	3.5208	3.83437	22.6331	16.5221	10.478	13.2646	3306	3418	464	1787	2243.75	monocyte
CDC45	12544	0.159372	0.00197736	0.000792743	0.000560096	5.89715	3.68356	3.11266	3.34751	58.5963	11.8488	7.64974	9.17893	1774	4270	635	2303	2245.5	monocyte
OAS2	246728	0.0214624	0.000110435	0.0156417	0.0241824	5.31115	4.01509	2.99482	3.34418	38.7023	15.1682	6.97135	9.15544	2370	3627	681	2307	2246.25	monocyte
CCND3	12445	0.0869156	0.00143289	0.000744022	0.000180603	4.63928	3.90967	3.13519	4.39758	23.9207	14.0289	7.7859	20.0768	3208	3812	620	1351	2247.75	monocyte
SGCE	20392	0.0232859	0.00640529	0.000528973	0.000132815	0.000223517	0.000370614	0.0549073	0.4906	-6454.02	-3892.22	-25.7783	-2.46896	42	28	166	8761	2249.25	microglia
PHF15	76901	0.00635968	1.78251e-08	0.000328139	0.00422092	0.063066	0.0306251	0.283471	0.193887	-22.3796	-46.6101	-4.60576	-6.95213	3324	1631	1067	2982	2251	microglia
CTSL	13039	0.0247506	0.000307557	0.000567338	0.000221601	0.0986872	0.0477135	0.115072	0.120704	-14.1246	-29.7394	-12.0439	-11.4593	4388	2241	394	1983	2251.5	microglia
PDGFA	18590	0.226923	5.30286e-06	0.00337782	0.00181909	0.0232019	0.0201192	0.472156	0.259769	-61.6814	-71.2087	-2.58277	-5.06877	1713	1207	2237	3878	2258.75	microglia
CD83	12522	0.0402921	0.110144	0.00439526	0.000859494	0.104787	0.0578887	0.129956	0.0784703	-13.2739	-24.4252	-10.6089	-17.8898	4564	2578	458	1460	2265	microglia
ELTD1	170757	0.153475	5.85085e-05	0.00609319	0.0174007	8.12352	7.27053	2.3488	2.03344	277.884	153.4	4.09401	3.0938	590	653	1204	6619	2266.5	monocyte
ABCC3	76408	0.00576189	2.90271e-05	0.00139593	0.000496987	0.101594	0.0755497	0.108396	0.0535366	-13.7064	-18.6003	-12.8158	-26.4509	4463	3099	370	1143	2268.75	microglia
E230016K23RIK	100504464	0.133323	0.000689186	0.00129557	0.00141095	5.2026	5.68894	2.2472	2.65604	35.8248	50.5873	3.74762	5.30301	2497	1542	1338	3703	2270	monocyte
NEK6	59126	0.0292508	0.00129767	0.000163765	1.90747e-05	0.0816702	0.05442	0.206941	0.118226	-17.1696	-26.0135	-6.48346	-11.7097	3930	2476	737	1938	2270.25	microglia
SBF2	319934	0.117293	0.00231266	0.000898232	0.00010136	0.0970767	0.0490394	0.149569	0.115941	-14.367	-28.922	-9.1543	-11.95	4348	2283	539	1912	2270.5	microglia
TLR12	384059	0.407573	0.0390425	0.000660912	0.00149827	0.0478019	0.0434803	0.25126	0.216261	-29.6835	-32.6829	-5.25634	-6.18357	2842	2107	931	3224	2276	microglia
ELOVL6	170439	0.0332486	0.0166768	0.000371787	0.000275686	5.58346	3.67399	2.77287	3.68856	46.95	11.7639	5.83468	11.8934	2058	4300	832	1927	2279.25	monocyte
D2ERTD750E	51944	0.152244	0.000130751	0.00246928	0.00205058	4.30661	4.29924	3.48932	3.76268	18.7888	18.688	10.2303	12.5731	3715	3088	476	1862	2285.25	monocyte
ABCA6	76184	0.0540278	0.000340875	0.00400195	0.00329542	6.03216	5.13158	2.72386	2.39129	64.4427	34.0558	5.60639	4.24625	1658	2040	870	4580	2287	monocyte
NEDD9	18003	0.0269746	0.00560473	0.000116338	0.000210746	4.4346	4.02883	3.71339	3.96485	20.6246	15.323	12.1172	14.6149	3494	3601	386	1671	2288	monocyte
PTGS1	19224	0.00205993	5.33124e-08	0.000368324	0.000265214	0.102787	0.0510478	0.11051	0.118335	-13.5417	-27.7646	-12.5612	-11.6984	4512	2346	375	1951	2296	microglia
ALDH1L2	216188	0.464311	9.34315e-05	0.000877172	0.00456097	0.00805636	0.00477983	0.413265	0.386873	-178.576	-301.33	-3.01481	-3.25145	796	348	1779	6274	2299.25	microglia
INPP4B	234515	0.601119	0.000154013	0.000483817	0.000438493	0.141047	0.0474788	0.0999261	0.0528923	-9.73659	-29.8889	-13.9434	-26.7791	5506	2234	335	1123	2299.5	microglia
TMEM44	224090	0.0569043	2.97413e-08	0.00229662	0.0160398	0.0174349	0.00815788	0.413124	0.366669	-82.2487	-176.347	-3.01599	-3.45576	1386	567	1778	5496	2306.75	microglia
TOM1L1	71943	0.0858979	1.34589e-09	0.00121054	0.000740884	0.0829068	0.0429138	0.197537	0.16648	-16.9062	-33.1209	-6.81483	-8.17546	3966	2085	698	2491	2310	microglia
FOSL2	14284	0.0167807	0.080511	4.64827e-05	0.000332309	4.78377	4.14525	2.55988	3.80535	26.546	16.6947	4.89658	12.9806	3036	3398	992	1820	2311.5	monocyte
SLC37A2	56857	0.674459	0.0217833	0.00349791	0.00273484	0.0639244	0.0848849	0.19919	0.103244	-22.0725	-16.5008	-6.75432	-13.4796	3345	3423	708	1779	2313.75	microglia
FKBP9	27055	0.0262858	0.00919459	0.00457073	0.00420418	0.0714902	0.0504543	0.278957	0.149856	-19.6845	-28.097	-4.68784	-9.13586	3601	2329	1043	2310	2320.75	microglia
IKBKE	56489	0.0506558	0.0338963	0.00773509	0.00741373	4.30926	4.58109	2.74419	3.57386	18.8252	22.9356	5.70013	10.908	3711	2696	850	2041	2324.5	monocyte
MARCKS	17118	0.0171848	1.79321e-05	0.00210867		0.0814309	0.0401992	0.285106		-17.2215	-35.3909	-4.57666		3921	1991	1071		2327.67	microglia
PON3	269823	0.247476	0.00192266	0.000200222	1.57041e-05	0.0963104	0.0760914	0.124041	0.0775394	-14.4852	-18.4644	-11.138	-18.1104	4325	3115	432	1453	2331.25	microglia
CMYA5	76469	0.116743	2.33719e-05	0.00209618	0.00183289	0.0474708	0.0338085	0.381739	0.213977	-29.894	-42.1745	-3.3013	-6.25465	2825	1744	1568	3192	2332.25	microglia
SLC22A17	59049	0.112475	0.00460733	0.00240437	0.00111316	0.0433699	0.0761356	0.343088	0.14379	-32.7674	-18.4534	-3.72483	-9.5416	2649	3116	1353	2227	2336.25	microglia
VCL	22330	0.0438484	0.00578424	0.000209722	0.000193681	4.92775	3.82754	3.43753	3.55154	29.4369	13.1973	9.83427	10.7252	2857	3973	495	2067	2348	monocyte
FAS	14102	0.0100827	0.00615688	0.0029337	0.0156243	6.72698	4.17749	2.91584	2.48739	104.931	17.0947	6.54666	4.60761	1173	3328	728	4169	2349.5	monocyte
CCND1	12443	0.129429	0.00145204	0.00127723	0.000213613	0.0892743	0.0639145	0.219952	0.098495	-15.6654	-22.076	-6.07184	-14.1531	4137	2766	789	1716	2352	microglia
CDCA7L	217946	0.238021	0.0185194	0.00661009	0.00473138	5.81621	3.61518	2.79002	3.3194	55.3449	11.254	5.91641	8.98249	1846	4423	817	2345	2357.75	monocyte
HELLS	15201	0.0859597	1.82646e-05	0.00617566	0.00225414	4.66209	3.79898	3.63379	3.79177	24.3179	12.919	11.4131	12.8496	3171	4028	424	1833	2364	monocyte
SAMD9L	209086	0.323831	0.00195948	0.00235251	0.00671447	4.4076	3.75989	3.71227	4.25506	20.2236	12.5469	12.107	18.0941	3540	4104	387	1454	2371.25	monocyte
MASTL	67121	0.0873839	0.0194266	0.00475333	0.00140218	4.65846	4.17044	3.1237	3.3329	24.2543	17.0064	7.71618	9.07637	3178	3344	626	2343	2372.75	monocyte
BC106179	320099	0.561036	1.47776e-12	0.00356702	0.000778294	0.124952	0.00994232	0.494967	0.0619738	-11.0532	-144.607	-2.44326	-22.7827	5092	682	2468	1260	2375.5	microglia
PRPF40B	54614	0.00550372	0.00330739	0.000993167	0.00434813	0.0223953	0.052518	0.512337	0.184882	-63.9208	-26.9735	-2.34544	-7.31403	1670	2409	2635	2807	2380.25	microglia
EGR2	13654	0.238092	5.46718e-07	0.0412676	0.0434447	0.0289212	0.0268443	0.27912	0.332302	-49.3854	-53.2445	-4.68485	-3.86069	1996	1483	1044	5000	2380.75	microglia
MGLL	23945	0.668599	0.00170722	0.00146778	0.000437519	0.16214	0.0352423	0.156847	0.0468288	-8.40722	-40.4385	-8.70719	-30.3106	6093	1809	563	1059	2381	microglia
IFI204	15951	0.0912182	0.0192826	0.00154621	0.00156655	4.79406	3.67169	3.49165	3.90397	26.7432	11.7435	10.2484	13.9697	3020	4304	475	1737	2384	monocyte
ETV1	14009	0.0741675	0.0219667	0.00134992	0.00201945	0.117899	0.0579835	0.176197	0.0758439	-11.7435	-24.3845	-7.69814	-18.5263	4914	2583	628	1424	2387.25	microglia
FABP4	11770	0.101595	0.0492628	0.00923184	0.000375348	7.81319	5.06487	2.32009	2.14972	223.909	32.4718	3.99363	3.43741	683	2115	1238	5521	2389.25	monocyte
MYOF	226101	0.0207276	0.00106162	0.000724135	0.002571	5.035	3.86309	2.13775	4.23827	31.7859	13.5514	3.40074	17.8733	2696	3904	1510	1461	2392.75	monocyte
GRK5	14773	0.0407468	0.0585214	0.00276226	0.00395094	4.91949	3.52164	3.13263	4.13809	29.2632	10.4847	7.7703	16.6072	2872	4601	621	1536	2407.5	monocyte
TREML4	224840	0.00199189	0.0492805	0.010069	0.0185076	5.61361	4.17126	2.30737	2.97818	47.9625	17.0166	3.94981	6.87991	2031	3340	1254	3020	2411.25	monocyte
TTC39B	69863	0.152877	1.52132e-06	0.000588615	0.00040434	0.0716309	0.0511717	0.16177	0.205072	-19.6448	-27.6962	-8.42755	-6.54692	3606	2353	585	3110	2413.5	microglia
LARGE	16795	0.0178302	0.000295622	0.00293104	0.00293744	0.122061	0.0633447	0.148899	0.0712622	-11.3265	-22.279	-9.19769	-19.749	5033	2749	535	1355	2418	microglia
ATRNL1	226255	0.0161368	0.000410701	0.00029609	0.000206811	4.61413	3.79637	3.40009	3.71866	23.4902	12.8939	9.55673	12.1652	3243	4031	513	1888	2418.75	monocyte
ZBP1	58203	0.0207041	0.00180298	0.00334296	0.00302715	5.01639	3.58166	3.28415	3.69064	31.3657	10.9726	8.74156	11.912	2721	4489	559	1922	2422.75	monocyte
DUSP6	67603	0.191215	0.00109429	0.000639028	0.000228269	0.0877274	0.0608815	0.161272	0.152335	-15.9503	-23.2003	-8.45506	-8.97932	4095	2668	582	2347	2423	microglia
FADS1	76267	0.0258277	0.00558236	0.00230393	0.00135462	0.107042	0.0580457	0.200233	0.104558	-12.984	-24.3578	-6.71665	-13.3041	4627	2585	713	1783	2427	microglia
FAM135A	68187	0.275237	0.00646986	0.00174709	0.000570641	0.112566	0.0474568	0.228384	0.111149	-12.323	-29.9029	-5.83016	-12.4862	4780	2229	833	1868	2427.5	microglia
RAB20	19332	0.0389399	0.0807225	0.010069	0.0210711	0.104013	0.0447992	0.29378	0.115894	-13.3764	-31.7061	-4.42776	-11.9551	4549	2154	1106	1911	2430	microglia
ZFP691	195522	0.0959322	0.0011111	0.00218932	0.000752437	0.106281	0.0774685	0.144657	0.0762625	-13.0805	-18.1275	-9.4816	-18.4219	4606	3172	517	1434	2432.25	microglia
ACOT11	329910	0.0447657	0.0105029	0.000841512	0.00012466	5.64299	3.74631	2.36924	3.24581	48.97	12.42	4.16669	8.48604	2010	4128	1183	2421	2435.5	monocyte
ATP2A3	53313	0.374769	0.0455785	0.000111523	1.9084e-05	6.02924	2.94416	3.34432	4.19147	64.3103	6.69627	9.15639	17.2708	1663	6054	538	1499	2438.5	monocyte
CCDC125	76041	0.00394997	0.0100426	0.000844275	0.000332309	4.43525	3.64436	3.40886	4.32407	20.6343	11.5043	9.62106	19.0297	3493	4360	508	1401	2440.5	monocyte
UGGT2	66435	0.0272549	2.40954e-05	0.00258525	0.00226547	0.0523563	0.048098	0.41291	0.178854	-27.0584	-29.4977	-3.01778	-7.5767	2998	2251	1775	2740	2441	microglia
TGFBI	21810	0.0306411	0.0160413	0.000729192	0.000377245	4.95198	3.61778	3.38797	3.61262	29.9523	11.2761	9.46841	11.2323	2819	4415	518	2013	2441.25	monocyte
NEURL1A	18011	0.0252904	0.340886	0.00268882	0.00518592	0.00405392	0.00977022	0.367495	0.428394	-355.377	-147.163	-3.44696	-2.89239	502	677	1485	7119	2445.75	microglia
PCDHGA2	93710	0.595063	6.4538e-06	0.0110699	0.000139426	0.0122215	0.0822677	0.240706	0.300209	-117.546	-17.0413	-5.5075	-4.32296	1078	3332	884	4490	2446	microglia
MOB3B	214944	0.0291301	0.0203948	4.64827e-05	0.00132334	5.25467	3.98024	3.09039	2.97083	37.1779	14.7824	7.51728	6.83987	2435	3697	642	3034	2452	monocyte
EZR	22350	0.209453	0.00429668	0.000936565	0.000627316	5.69235	3.6776	2.91588	3.03951	50.7093	11.7958	6.54686	7.22214	1962	4284	727	2845	2454.5	monocyte
RILPL1	75695	0.0416903	0.00413523	0.00257815	0.000470329	0.106774	0.0495682	0.255882	0.120739	-13.0178	-28.6081	-5.15291	-11.4558	4625	2304	947	1986	2465.5	microglia
NCAPG2	76044	0.0858979	0.0206077	0.00326713	0.000309642	4.89536	3.59769	3.42778	3.58392	28.7611	11.1063	9.76133	10.9913	2899	4455	500	2032	2471.5	monocyte
CKB	12709	0.0996008	0.0100685	0.00102028	0.00554209	0.123493	0.0563148	0.155807	0.0996481	-11.1895	-25.1216	-8.7685	-13.9836	5061	2540	557	1736	2473.5	microglia
ST6GAL1	20440	0.0464078	0.0111641	0.00166244	0.000778294	0.119781	0.0779469	0.141867	0.0619738	-11.5514	-18.0132	-9.67758	-22.7827	4966	3187	505	1261	2479.75	microglia
ADAM19	11492	0.0554407	0.000395429	0.0146323	0.0209582	7.12625	4.53955	1.96827	2.43889	138.706	22.2562	2.91299	4.42226	957	2751	1864	4363	2483.75	monocyte
ATP8B1	54670	0.287617	0.00012896	0.00496136	0.00166661	0.00566895	0.00748847	0.467469	0.402009	-253.991	-192.156	-2.61314	-3.1119	631	526	2207	6591	2488.75	microglia
FRMD4B	232288	0.0784989	5.37018e-10	0.000976362	0.000557072	0.135596	0.0607705	0.119505	0.0845479	-10.1475	-23.2436	-11.5791	-16.5685	5340	2665	415	1539	2489.75	microglia
SPC25	66442	0.104151	6.17316e-06	0.00223472	0.00485489	3.82506	4.45417	3.02834	3.78162	13.1728	20.92	7.15873	12.7525	4587	2866	669	1841	2490.75	monocyte
SLC4A1	20533	0.740021	0.00131362	0.0151957	0.0420874	8.4827	6.17477	2.21692	1.99115	356.723	71.2422	3.64901	2.97554	499	1206	1382	6902	2497.25	monocyte
ITGA1	109700	0.0355719	0.0235886	0.00174332	0.00215512	13.1176	10.8395	5.30501	1.71707	8886.47	1831.36	38.5337	2.28768	29	59	114	9796	2499.5	monocyte
SLC40A1	53945	0.236871	0.007474	0.00257165	0.00651983	0.173125	0.0473427	0.0897837	0.0515648	-7.84325	-29.9762	-15.5738	-27.4813	6370	2227	293	1111	2500.25	microglia
ZFP69	381549	0.446911	0.000639325	0.00257815	0.00156375	0.0980039	0.059895	0.268359	0.126758	-14.2265	-23.5905	-4.89148	-10.8888	4371	2635	995	2042	2510.75	microglia
SLC30A4	22785	0.460021	0.0105573	0.00763235	0.00687887	0.133657	0.0415035	0.213258	0.119626	-10.3017	-34.2632	-6.27733	-11.567	5294	2034	767	1966	2515.25	microglia
CDCA5	67849	0.466607	0.0458292	0.000358808	0.000505354	4.09993	4.24312	3.11334	3.45241	16.1476	17.9368	7.65387	9.94662	4071	3202	634	2159	2516.5	monocyte
SLC1A4	55963	0.162491	0.00973839	0.00919723	0.00548319	0.0667148	0.0233978	0.331448	0.266951	-21.1287	-61.1607	-3.87183	-4.91975	3436	1371	1286	3974	2516.75	microglia
CNRIP1	380686	0.532903	0.000447757	0.005053	0.000326646	0.0141028	0.0072883	0.142594	0.460105	-101.799	-197.447	-9.62574	-2.66211	1202	514	507	7861	2521	microglia
SRC	20779	0.601119	9.52195e-08	0.00194447	0.000332309	0.0226282	0.00967026	0.502082	0.349233	-63.2577	-148.689	-2.40237	-3.65119	1687	668	2532	5199	2521.5	microglia
CHAF1B	110749	0.159372	0.00478624	0.00714577	0.00908147	5.13581	3.88956	2.66465	3.0787	34.1587	13.8209	5.34072	7.4485	2576	3858	916	2782	2533	monocyte
CX3CR1	13051	0.0839208	3.75318e-05	0.000254994	0.000483902	0.087648	0.0482643	0.276404	0.179765	-15.9652	-29.3943	-4.73547	-7.53583	4094	2257	1029	2760	2535	microglia
PLK3	12795	0.522946	0.00723982	0.0106533	0.0105768	0.123386	0.0657034	0.181577	0.091731	-11.1997	-21.4615	-7.45585	-15.2327	5057	2829	648	1623	2539.25	microglia
EMR4	52614	0.0150539	0.0302777	0.00159229	0.00213966	4.89884	3.73057	3.43532	3.15625	28.8331	12.2744	9.81767	7.91512	2895	4153	497	2626	2542.75	monocyte
ST5	76954	0.0248992	4.58087e-05	0.000819117	0.00319815	0.0966696	0.0460608	0.25527	0.177142	-14.4296	-30.8242	-5.16637	-7.65453	4339	2194	942	2713	2547	microglia
SMC2	14211	0.110636	1.30355e-05	0.00142705	0.000315509	4.25754	3.67698	3.72107	3.85829	18.127	11.7903	12.1872	13.5031	3809	4286	384	1774	2563.25	monocyte
CCNE2	12448	0.0397018	0.000106222	0.00349791	0.00221701	4.99148	4.80872	2.67329	2.47169	30.8115	27.0266	5.37884	4.54694	2753	2401	908	4203	2566.25	monocyte
G530011O06RIK	654820	0.120026	2.75871e-05	0.0110223	0.0225254	0.0889515	0.0189302	0.0571396	0.3219	-15.724	-75.7125	-24.7519	-4.00038	4131	1142	170	4825	2567	microglia
RARG	19411	0.0386261	0.112691	0.00352787	0.00221141	5.50688	3.71326	2.18007	3.18387	44.4713	12.116	3.53175	8.08744	2146	4193	1437	2513	2572.25	monocyte
TTC28	209683	0.031664	0.00680011	0.000587218	0.00418945	0.0852696	0.0630521	0.276484	0.167683	-16.4241	-22.3847	-4.73397	-8.11339	4030	2740	1030	2509	2577.25	microglia
TRIB1	211770	0.26337	2.95793e-06	0.00110113	0.000147914	0.114936	0.0606522	0.23392	0.119258	-12.0588	-23.2899	-5.68098	-11.6042	4845	2662	853	1960	2580	microglia
STXBP1	20910	0.193398	0.000600085	0.0013539	0.0011102	0.0510822	0.0512651	0.367727	0.238238	-27.7455	-27.6448	-3.4445	-5.56946	2951	2357	1486	3536	2582.5	microglia
ATAD2	70472	0.0304794	0.0143127	0.00232713	0.00025356	4.49741	3.49776	3.28319	3.89624	21.5868	10.2961	8.73503	13.8897	3392	4655	560	1759	2591.5	monocyte
ARSG	74008	0.615	6.30153e-06	0.00172308	4.67226e-05	0.0797836	0.0326929	0.332116	0.235422	-17.5872	-43.6306	-3.86311	-5.64173	3877	1708	1288	3499	2593	microglia
TUBB2B	73710	0.542579	0.0064462	0.00232829	0.00166855	0.0688791	0.0220993	0.473404	0.221128	-20.4493	-64.7836	-2.57479	-6.03701	3512	1320	2245	3297	2593.5	microglia
SPNB2	20742	0.0567925	7.27365e-09	0.00216692	0.00107836	4.71318	3.44197	3.03825	3.78948	25.2306	9.86763	7.21492	12.8276	3114	4773	663	1834	2596	monocyte
PPCDC	66812	0.0360351	0.0216861	0.000497135	0.000323978	0.105371	0.0610053	0.26464	0.138153	-13.1976	-23.1522	-4.96681	-9.95074	4578	2673	977	2158	2596.5	microglia
RGMB	68799	0.239271	0.00669557	0.000819259	9.43656e-07	0.121848	0.0497041	0.328748	0.106928	-11.3472	-28.5285	-3.90743	-12.9983	5027	2308	1273	1810	2604.5	microglia
TIMP2	21858	0.0394588	0.00156933	0.00152476	0.000595694	0.113124	0.0896201	0.131749	0.0890514	-12.2597	-15.6031	-10.4579	-15.7058	4793	3557	467	1606	2605.75	microglia
WDHD1	218973	0.0811617	2.04322e-05	0.00348186	0.00122452	4.47717	3.54101	3.17467	3.70011	21.2721	10.6399	8.02966	11.997	3418	4561	603	1900	2620.5	monocyte
ZBTB4	75580	0.0116854	0.000435503	0.00122659		0.0906758	0.0564539	0.304363		-15.4157	-25.0585	-4.25761		4173	2544	1164		2627	microglia
CDT1	67177	0.0374987		0.00383788	0.00306183	4.9741		2.50119	2.52703	30.4306		4.66154	4.76384	2780		1047	4063	2630	monocyte
ALDH2	11669	0.0525667	0.00330638	0.000375721	0.000567094	4.94594	3.51356	3.20411	3.1911	29.823	10.4205	8.21583	8.13309	2829	4620	592	2502	2635.75	monocyte
ABI3	66610	0.566976	0.00548612	0.00130507	0.000602071	0.0697206	0.0909938	0.207244	0.17536	-20.1966	-15.3601	-6.4733	-7.73718	3544	3593	740	2696	2643.25	microglia
ARVCF	11877	0.0402921	1.58843e-05	0.000540508	8.15183e-05	0.102448	0.0430153	0.341512	0.173596	-13.5881	-33.0416	-3.74414	-7.82071	4501	2092	1341	2651	2646.25	microglia
FAM134B	66270	0.0782735	9.4224e-05	0.00152476	3.51749e-05	0.121205	0.0714493	0.244492	0.0992821	-11.4099	-19.696	-5.41491	-14.037	5005	2979	900	1720	2651	microglia
HEG1	77446	0.100105	8.56867e-07	0.0191586	0.0469731	5.78799	4.38972	2.87365	2.26952	54.2532	19.9622	6.32918	3.82164	1880	2954	759	5051	2661	monocyte
KRBA1	77827	0.237648	0.00149109	0.000421741	3.55406e-05	0.0422868	0.0328662	0.403829	0.310968	-33.6193	-43.398	-3.09583	-4.15731	2605	1715	1707	4658	2671.25	microglia
TAGLN2	21346	0.158047	0.0158861	0.00139593	0.00157983	4.36212	3.43565	3.50396	3.76882	19.5651	9.82017	10.3448	12.631	3622	4796	471	1850	2684.75	monocyte
UCK2	80914	0.0569043	0.0212772	0.00130534	0.00982656	6.96436	5.21573	3.45237	1.93527	123.877	36.1612	9.94629	2.8245	1043	1965	488	7252	2687	monocyte
OASL2	23962	0.0395094	0.00484327	0.0240428	0.0480907	4.4506	3.59131	2.95379	3.50433	20.8657	11.0529	6.74781	10.3477	3464	4470	709	2112	2688.75	monocyte
TSPAN18	241556	0.251289	3.13912e-05	0.000638319	0.00409786	0.300803	0.00515043	0.105465	0.0366759	-4.31351	-279.612	-13.1854	-38.8384	9134	371	353	928	2696.5	microglia
LYVE1	114332	0.809161	0.000184812	0.0357947	0.00596004	0.0119346	0.00356264	0.487947	0.427218	-120.384	-404.452	-2.48479	-2.9016	1061	262	2406	7096	2706.25	microglia
SLC43A3	58207	0.223058	0.00217573	0.00349585	0.00193168	4.80824	3.53496	2.85236	3.18534	27.0173	10.5912	6.22181	8.09669	3000	4577	775	2512	2716	monocyte
PAPSS2	23972	0.029789	0.104868	0.00156364	0.0010353	4.19399	3.04455	4.31689	5.12389	17.3028	7.25092	18.9302	33.8693	3910	5774	225	1007	2729	monocyte
H2-OB	15002	0.0218101	0.00893011	0.0100528	0.0034412	0.0514755	0.0287039	0.278029	0.359677	-27.5298	-49.763	-4.70506	-3.53184	2973	1557	1039	5371	2735	microglia
PECR	111175	0.0438484	0.0711147	0.0110425	0.00205346	0.130429	0.0629782	0.281755	0.116755	-10.5687	-22.4115	-4.63666	-11.8634	5218	2739	1058	1931	2736.5	microglia
AGPAT3	28169	0.07879	0.000103098	0.00176132	0.00140218	0.107292	0.076518	0.32973	0.115596	-12.9527	-18.3588	-3.89442	-11.9871	4637	3128	1278	1905	2737	microglia
HIP1	215114	0.0380781	0.0412509	0.000733151	0.00147599	4.95871	3.74679	2.56768	2.95966	30.0971	12.4245	4.92854	6.77941	2808	4126	985	3061	2745	monocyte
PORCN	53627	0.17495	0.00899915	0.0018688	0.0211366	0.0252555	0.0374942	0.40548	0.371947	-56.6255	-37.98	-3.08138	-3.40023	1816	1897	1724	5583	2755	microglia
9030625A04RIK	210808	0.190492	6.49748e-05	0.00200289	0.00131746	0.167603	0.0765301	0.124344	0.06327	-8.11749	-18.3558	-11.1096	-22.3059	6229	3130	434	1288	2770.25	microglia
SMAD7	17131	0.341222	0.00116095	0.0154188	0.00668608	0.133633	0.0548473	0.245314	0.159752	-10.3037	-25.807	-5.39519	-8.54005	5292	2485	904	2410	2772.75	microglia
CPNE2	234577	0.179908	0.0126413	0.00535854	0.00778037	5.45165	4.09808	2.30042	2.50078	42.7632	16.1256	3.92599	4.65992	2223	3476	1266	4139	2776	monocyte
MAPKAPK3	102626	0.0152885	0.0023113	0.000580822	0.00119967	4.76735	3.23036	3.09729	3.43539	26.2342	8.38505	7.55812	9.8182	3053	5257	641	2182	2783.25	monocyte
MCM4	17217	0.0150854	0.0648074	0.000709153	0.000726941	4.57856	3.27458	2.91854	3.65971	22.8938	8.67713	6.56082	11.6381	3291	5164	725	1956	2784	monocyte
A730069N07RIK	244425	0.331242	0.00633383	0.00318313	0.00817699	0.0473685	0.0540368	0.318668	0.314581	-29.9596	-26.2015	-4.04565	-4.10425	2818	2453	1219	4698	2797	microglia
MAGED2	80884	0.502453	0.0021359	0.00485572	0.00774912	0.0709932	0.0429472	0.418457	0.24988	-19.8257	-33.0947	-2.97179	-5.28799	3583	2088	1815	3710	2799	microglia
DHCR24	74754	0.0257325	0.156862	0.00306389	0.00661479	5.44234	3.85837	2.43106	2.58361	42.482	13.5039	4.39289	4.99438	2236	3915	1116	3937	2801	monocyte
HMGN5	50887	0.456201	0.0287108	0.00639519	0.000470329	4.65991	3.17798	3.24039	3.49757	24.2797	8.05037	8.45049	10.2947	3173	5397	584	2119	2818.25	monocyte
PRUNE2	353211	0.325266	0.00622562	0.00270039	0.00205058	0.060432	0.0701484	0.313872	0.262577	-23.3765	-20.0704	-4.11456	-5.00951	3252	2942	1200	3914	2827	microglia
ETS1	23871	0.0223964	0.000214964	0.000663854	0.000243347	0.169954	0.0762813	0.17575	0.0637107	-7.99857	-18.4172	-7.71895	-22.1481	6283	3120	625	1291	2829.75	microglia
BRCA1	12189	0.0304794	5.377e-05	0.00263758	0.000531693	4.31603	4.29796	2.82958	2.63511	18.9184	18.6705	6.10867	5.21221	3699	3092	786	3785	2840.5	monocyte
CFH	12628	0.028516	2.05726e-07	0.00369		0.129195	0.0688475	0.125198		-10.6743	-20.4589	-11.0305		5190	2903	436		2843	microglia
RRM1	20133	0.16081	0.0368224	0.00142367	0.000810567	4.33501	3.19333	3.43856	3.76437	19.1822	8.1472	9.84197	12.589	3669	5351	494	1861	2843.75	monocyte
CD14	12475	0.0984566	0.0431508	0.000178615	0.000363286	0.144696	0.0893283	0.116956	0.106619	-9.47891	-15.6556	-11.8421	-13.0375	5612	3548	407	1809	2844	microglia
EMP3	13732	0.060766	0.0451091	0.0018352	0.000614352	5.13793	3.83426	2.59162	2.59511	34.2104	13.2635	5.02777	5.04235	2571	3957	965	3900	2848.25	monocyte
SULT1A1	20887	0.201205	0.00408569	0.000235146	0.000594466	0.13185	0.104063	0.192398	0.0839601	-10.4495	-13.3697	-7.00961	-16.688	5251	3944	680	1524	2849.75	microglia
MASP1	17174	0.601119	0.00335921	0.00282049	0.00910825	0.0197894	0.0155436	0.522264	0.379679	-72.4037	-92.3167	-2.29249	-3.32168	1532	981	2738	6154	2851.25	microglia
MCM6	17219	0.143874	0.00614294	0.00219467	0.000750358	4.45183	3.59396	3.47503	2.97934	20.8845	11.0751	10.1196	6.88628	3461	4465	481	3018	2856.25	monocyte
CD33	12489	0.0390213	0.00129659	0.000962426	0.000375348	0.149096	0.0752287	0.13852	0.13474	-9.18487	-18.6818	-9.92306	-10.215	5729	3089	490	2136	2861	microglia
PLK4	20873	0.0268195	0.0388833	0.00142522	0.00255577	4.89226	3.4788	3.18133	2.83062	28.6972	10.1487	8.07142	6.11382	2904	4694	599	3267	2866	monocyte
PRDX6	11758	0.0531101	0.00098429	0.000913349	0.000236548	4.23764	3.32577	3.22924	3.60693	17.865	9.02664	8.37776	11.1841	3831	5035	587	2015	2867	monocyte
4930534B04RIK	75216	0.118091	4.89206e-05	0.00176463	0.00122452	4.39925	3.18821	3.24295	3.64863	20.1011	8.11478	8.46727	11.5414	3552	5364	581	1977	2868.5	monocyte
PDK1	228026	0.119717	2.5395e-06	0.00184348	0.000825723	0.1302	0.0719489	0.281307	0.147424	-10.5881	-19.5558	-4.64478	-9.29452	5210	2997	1053	2273	2883.25	microglia
DIAP1	13367	0.0665145	7.90039e-08	0.000898232	0.000163005	4.17701	3.61697	2.81225	3.29249	17.0886	11.2692	6.02381	8.79803	3941	4420	802	2371	2883.5	monocyte
GPR157	269604	0.161307	0.0111618	0.00145406	0.00538622	0.157735	0.0600066	0.225295	0.139001	-8.65543	-23.5458	-5.91659	-9.88708	5968	2639	816	2163	2896.5	microglia
TIMELESS	21853	0.0218101	2.39709e-06	0.00652989	0.00722723	4.92976	4.91883	1.81412	2.5126	29.4793	29.2493	2.51645	4.70649	2855	2268	2349	4114	2896.5	monocyte
RNF128	66889	0.16496	0.0171611	0.00337782	0.000184554	0.093189	0.0714913	0.367905	0.189542	-14.9868	-19.6841	-3.44261	-7.1224	4244	2983	1489	2882	2899.5	microglia
SRPK3	56504	0.0570865	3.61727e-05	0.000606418	0.00035738	0.141597	0.0429627	0.356124	0.170376	-9.69693	-33.0826	-3.57165	-7.97755	5523	2090	1415	2610	2909.5	microglia
MAP3K6	53608	0.305871	0.0112415	0.00210197	0.00735467	6.80532	4.33169	1.92935	2.14936	110.842	19.1358	2.80884	3.43632	1128	3044	1970	5532	2918.5	monocyte
LPHN2	99633	0.147475	0.000124207	0.00125244	0.00627945	0.132878	0.0760482	0.321259	0.128892	-10.3649	-18.4752	-4.0093	-10.7005	5272	3112	1230	2070	2921	microglia
CAPN3	12335	0.0757342	0.0211976	0.000808202	0.000224847	0.0198974	0.349055	0.042446	0.0553128	-72.0079	-3.65328	-33.4914	-25.5856	1541	8898	130	1167	2934	microglia
CTSD	13033	0.197599	3.96268e-08	0.000188962	1.08898e-05	0.0901341	0.0547161	0.245537	0.287291	-15.5113	-25.8701	-5.38986	-4.5383	4157	2482	906	4208	2938.25	microglia
ANKLE1	234396	0.0851716	1.08994e-10	0.00200056	0.00632297	8.49463	6.61586	1.82897	1.85568	359.693	97.0781	2.55284	2.61922	494	952	2287	8028	2940.25	monocyte
OLFR1423	258675	0.64568	0.00329946	0.0181709	0.0281843	0.0684899	0.0144216	0.422604	0.365507	-20.5683	-99.5382	-2.9382	-3.4682	3499	926	1844	5492	2940.25	microglia
TNFAIP2	21928	0.0173475	0.007374	0.000604265	0.000108576	4.30936	3.33767	3.06131	3.27512	18.8265	9.10971	7.34731	8.68075	3710	5000	654	2399	2940.75	monocyte
B3GNT5	108105	0.352492	0.00619571	0.00997167	0.00498957	6.86315	4.39593	2.15982	2.08505	115.416	20.0526	3.46859	3.2429	1093	2944	1471	6294	2950.5	monocyte
ZC3H12B	547176	0.00547107	0.00217299	0.0035484		0.105315	0.0552623	0.416795		-13.2049	-25.6095	-2.98545		4577	2508	1805		2963.33	microglia
ADAM3	11497	0.68592	0.00211449	2.15605e-05	0.0011434	0.124155	0.0191305	0.397624	0.265589	-11.1273	-74.9144	-3.15123	-4.94737	5075	1156	1664	3966	2965.25	microglia
ENPP1	18605	0.261386	0.00535015	0.00193475	0.00208387	0.141803	0.0714401	0.255858	0.161107	-9.68214	-19.6986	-5.15343	-8.46416	5531	2978	946	2429	2971	microglia
CAMK1	52163	0.0506574	9.54309e-06	0.0007911	0.00265837	0.116105	0.0519401	0.313004	0.231	-11.9325	-27.2791	-4.12725	-5.75879	4873	2378	1195	3447	2973.25	microglia
SLC13A3	114644	0.0215257	0.00835385	0.00200998	0.00228364	0.0525295	0.0536612	0.333907	0.345721	-26.9675	-26.3884	-3.83992	-3.69296	3003	2442	1303	5164	2978	microglia
SALL2	50524	0.186153	0.00515848	0.0231259	0.00614948	0.121252	0.0510518	0.390709	0.191046	-11.4053	-27.7624	-3.21504	-7.06262	5008	2348	1620	2943	2979.75	microglia
5730508B09RIK	70617	0.0131822	0.194357	0.00174121	0.00413946	4.79147	3.04016	2.61253	3.45531	26.6934	7.22584	5.11577	9.96861	3027	5794	954	2154	2982.25	monocyte
PRDM1	12142	0.695839	0.011565	0.00994892	0.000618341	0.0824597	0.0741306	0.389662	0.223486	-17.0005	-18.9658	-3.22491	-5.96832	3955	3065	1613	3314	2986.75	microglia
EPB4.1L2	13822	0.0402921	0.000204152	0.000713772	0.000286356	0.15047	0.085252	0.137414	0.148567	-9.09658	-16.4276	-10.0068	-9.21935	5780	3432	485	2281	2994.5	microglia
SLFN2	20556	0.132638	0.047799	0.000327856	6.12532e-05	4.75607	3.39247	2.75561	2.87021	26.0221	9.50113	5.75338	6.31171	3064	4897	844	3179	2996	monocyte
LYZ1	17110	0.118075	2.53397e-08	0.000124071	0.00625822	9.48401	7.14463	2.41741	1.71171	715.098	140.497	4.34211	2.27548	295	694	1132	9864	2996.25	monocyte
PROS1	19128	0.0123258	0.000258819	0.00040914	0.000304806	0.171584	0.0614801	0.17741	0.156979	-7.918	-22.9696	-7.64223	-8.69943	6329	2693	636	2387	3011.25	microglia
GTF2H2	23894	0.0850444	9.30071e-07	0.000877172	1.0606e-05	0.14523	0.0961453	0.154026	0.136268	-9.44223	-14.5109	-8.87547	-10.0951	5628	3737	552	2146	3015.75	microglia
RSAD2	58185	0.20793	0.0407364	0.0192266	0.0451573	4.8866	3.64837	2.15777	2.79609	28.5811	11.5392	3.46225	5.94557	2907	4356	1476	3335	3018.5	monocyte
SERPINE1	18787	0.610136	0.0068159	0.0114406	0.0351904	0.0268246	0.0207035	0.366513	0.44685	-53.2841	-69.1849	-3.45742	-2.75436	1892	1234	1478	7494	3024.5	microglia
FMNL3	22379	0.0882717	0.00249023	0.00139129	0.00057312	0.183532	0.0915022	0.134941	0.0803406	-7.37131	-15.2721	-10.1991	-17.4619	6603	3606	477	1485	3042.75	microglia
LILRB3	18733	0.0129793	0.0047137	0.00157715		4.31858	3.52117	2.73403		18.9537	10.4809	5.65312		3694	4602	859		3051.67	monocyte
TUSC1	69136	0.0207041	0.0123609	0.00526522	0.00480367	5.10425	3.76154	1.65495	3.22067	33.3979	12.5624	2.14913	8.32218	2615	4099	3068	2463	3061.25	monocyte
KIF18A	228421	0.0383309	0.0144847	0.00263953	0.00050074	4.22312	3.01536	3.36544	3.60936	17.6761	7.08563	9.30618	11.2047	3869	5856	528	2014	3066.75	monocyte
TGFBR2	21813	0.0301751	0.000283775	0.00288913	0.00326343	0.156676	0.0914342	0.165956	0.13888	-8.71721	-15.2838	-8.20285	-9.89607	5926	3605	593	2161	3071.25	microglia
SDC4	20971	0.0311448	0.00119366	0.00620481	0.0394776	0.0291735	0.0140532	0.641668	0.329592	-48.9539	-102.16	-1.78529	-3.89623	2011	911	4453	4954	3082.25	microglia
AFAP1L1	106877	0.400584	0.0218661	0.00197057	0.000324858	0.0856873	0.0741183	0.358994	0.253528	-16.3417	-18.969	-3.53943	-5.20511	4044	3064	1436	3793	3084.25	microglia
FAM107B	66540	0.0996473	0.00040948	0.00243937	0.002923	4.29713	3.37862	2.495	3.15102	18.6592	9.40076	4.63729	7.88282	3729	4928	1057	2632	3086.5	monocyte
TBC1D2	381605	0.0372745	0.0344359	0.00163666	0.0485727	7.39261	4.88426	1.9543	1.92754	167.035	28.533	2.87529	2.80405	832	2306	1900	7336	3093.5	monocyte
EZH2	14056	0.0708329	6.38489e-05	0.00130534	0.000312995	3.96548	3.34374	2.99178	3.20937	14.6217	9.15236	6.95456	8.24944	4301	4987	683	2471	3110.5	monocyte
8430427H17RIK	329540	0.0559867	0.000421899	0.00116355	0.000459947	0.164817	0.0743348	0.332907	0.116295	-8.26282	-18.9124	-3.85284	-11.9122	6157	3070	1298	1918	3110.75	microglia
SP100	20684	0.0263551	0.000295501	0.00086322	0.000567094	3.82561	3.31518	3.38566	3.33443	13.1783	8.95331	9.45166	9.08706	4584	5061	519	2337	3125.25	monocyte
PCDHGA9	93717	0.102783	6.4538e-06	0.00258623	0.000139426	0.0383098	0.0822677	0.476279	0.300209	-37.1609	-17.0413	-2.55656	-4.32296	2436	3333	2281	4491	3135.25	microglia
PCDHGC3	93706	0.102783	6.4538e-06	0.00258623	0.000139426	0.0383098	0.0822677	0.476279	0.300209	-37.1609	-17.0413	-2.55656	-4.32296	2436	3333	2281	4491	3135.25	microglia
PCDHGA3	93711	0.102783	6.4538e-06	0.00258623	0.000139426	0.0383098	0.0822677	0.476279	0.300209	-37.1609	-17.0413	-2.55656	-4.32296	2436	3333	2281	4491	3135.25	microglia
PCDHGA8	93716	0.102783	6.4538e-06	0.00258623	0.000139426	0.0383098	0.0822677	0.476279	0.300209	-37.1609	-17.0413	-2.55656	-4.32296	2436	3333	2281	4491	3135.25	microglia
PCDHGA12	93724	0.102783	6.4538e-06	0.00258623	0.000139426	0.0383098	0.0822677	0.476279	0.300209	-37.1609	-17.0413	-2.55656	-4.32296	2436	3333	2281	4491	3135.25	microglia
PCDHGC4	93707	0.102783	6.4538e-06	0.00258623	0.000139426	0.0383098	0.0822677	0.476279	0.300209	-37.1609	-17.0413	-2.55656	-4.32296	2436	3333	2281	4491	3135.25	microglia
PCDHGB6	93703	0.102783	6.4538e-06	0.00258623	0.000139426	0.0383098	0.0822677	0.476279	0.300209	-37.1609	-17.0413	-2.55656	-4.32296	2436	3333	2281	4491	3135.25	microglia
PCDHGA11	93723	0.102783	6.4538e-06	0.00258623	0.000139426	0.0383098	0.0822677	0.476279	0.300209	-37.1609	-17.0413	-2.55656	-4.32296	2436	3333	2281	4491	3135.25	microglia
PCDHGC5	93708	0.102783	6.4538e-06	0.00258623	0.000139426	0.0383098	0.0822677	0.476279	0.300209	-37.1609	-17.0413	-2.55656	-4.32296	2436	3333	2281	4491	3135.25	microglia
FABP5	16592	0.012513	0.00535778	0.00236263	0.107766	6.54163	5.62022	4.94256	1.73502	92.1595	48.1875	29.751	2.32883	1280	1592	150	9521	3135.75	monocyte
RASGEF1B	320292	0.417148	0.0265483	0.0040818	0.00420209	0.214094	0.0556245	0.243751	0.112412	-6.25096	-25.4396	-5.4328	-12.3405	7283	2519	896	1881	3144.75	microglia
NTPCR	66566	0.613314	0.000238866	0.00374614	0.000572274	0.151981	0.0905825	0.212479	0.162759	-9.00137	-15.4321	-6.3021	-8.37337	5818	3586	762	2451	3154.25	microglia
GALNT12	230145	0.233746	0.0137642	0.00110874	0.000471366	0.149045	0.0554227	0.315251	0.213778	-9.18817	-25.534	-4.09453	-6.26094	5726	2512	1203	3186	3156.75	microglia
NIN	18080	0.00289853	0.00363948	0.000936904	0.000210337	3.90762	3.29282	2.98729	3.23161	14.0076	8.80027	6.92985	8.39317	4409	5118	684	2443	3163.5	monocyte
PRAM1	378460	0.0887751	0.0195611	0.00346959	0.00264911	3.94585	3.4588	2.64019	3.14271	14.4106	9.99516	5.23412	7.83182	4342	4742	934	2648	3166.5	monocyte
JUN	16476	0.109967	0.00023269	0.0110705	0.00690953	0.118561	0.0613313	0.255114	0.279978	-11.6752	-23.0265	-5.16983	-4.66907	4929	2689	940	4137	3173.75	microglia
LDLR	16835	0.0231865	0.0247838	0.000780837	9.04538e-05	4.25455	3.07885	2.74399	3.26323	18.0874	7.44942	5.6992	8.6013	3813	5674	851	2403	3185.25	monocyte
AGPHD1	235386	0.0288379	0.000351101	0.00282003	0.0417299	0.0512215	0.0315969	0.398555	0.39474	-27.6688	-45.1613	-3.14281	-3.17757	2958	1670	1672	6451	3187.75	microglia
RIPK3	56532	0.0478243	0.407584	0.00679425	0.0231051	5.29985	3.29725	2.47505	2.4799	38.3926	8.83039	4.55987	4.5786	2384	5114	1074	4184	3189	monocyte
TPPP3	67971	0.0265109	0.515336	0.0194325	0.0121479	4.76161	4.23417	1.80418	2.51291	26.1261	17.8197	2.49232	4.7077	3058	3224	2394	4107	3195.75	monocyte
BASP1	70350	0.159372	6.10602e-06	0.00784994	0.00402692	0.00874399	0.00519296	0.407568	0.524409	-164.493	-277.318	-3.06328	-2.28131	843	373	1737	9836	3197.25	microglia
IDH1	15926	0.0121439	0.0066985	0.000732474	0.000781448	4.20255	3.30052	2.90249	2.95885	17.4117	8.85274	6.47715	6.77505	3897	5104	738	3062	3200.25	monocyte
ACP2	11432	0.131892	0.000793777	0.000953732	0.000321175	0.141602	0.0752562	0.189205	0.238012	-9.69653	-18.6748	-7.13598	-5.57521	5524	3091	670	3529	3203.5	microglia
B230120H23RIK	65964	0.042345	0.00246916	0.00162468	0.000309642	3.89945	3.48459	2.67242	3.05434	13.9228	10.1935	5.375	7.3071	4423	4684	909	2809	3206.25	monocyte
BTG2	12227	0.143162	4.56025e-05	0.0122184	0.0143382	0.0963998	0.0439442	0.332493	0.339084	-14.4713	-32.3327	-3.85822	-3.77426	4329	2125	1291	5088	3208.25	microglia
SNTB1	20649	0.00159168	0.000405188	0.0141167	0.0114849	8.81619	6.88773	2.4696	1.66655	449.751	117.417	4.53889	2.17455	421	808	1083	10552	3216	monocyte
ENC1	13803	0.0218766	0.0120856	0.00698207	0.000380442	0.131156	0.0746003	0.269209	0.241287	-10.5074	-18.8433	-4.87455	-5.49309	5236	3076	998	3570	3220	microglia
SPIRE1	68166	0.142573	0.000921531	0.00139593	0.000595694	0.220878	0.0922762	0.146607	0.0652102	-6.04439	-15.1399	-9.34905	-21.6275	7437	3631	525	1300	3223.25	microglia
HPS4	192232	0.595063	0.0210269	0.0011405	0.000903063	0.173195	0.0937389	0.19789	0.142961	-7.8399	-14.896	-6.80181	-9.59981	6372	3673	701	2210	3239	microglia
BIN1	30948	0.200722	0.0107554	0.00196375	0.000825092	0.202343	0.0904436	0.147746	0.105333	-6.64164	-15.4565	-9.27325	-13.2026	7056	3580	533	1789	3239.5	microglia
CAPG	12332	0.0692745	0.0066595	0.000825611	0.000410586	4.05812	3.08451	2.90639	3.22975	15.6577	7.48264	6.49742	8.38105	4140	5660	732	2447	3244.75	monocyte
SEMA6D	214968	0.563587	0.000103032	0.00351857	0.022861	0.102175	0.0352797	0.458121	0.30483	-13.6258	-40.3951	-2.67557	-4.25038	4485	1810	2119	4572	3246.5	microglia
ANUBL1	67492	0.0631394	0.00364967	0.0149853	0.0071058	4.93139	3.61746	2.32922	2.40341	29.5137	11.2734	4.02535	4.29054	2851	4417	1223	4523	3253.5	monocyte
GLIPR1	73690	0.025285	0.0508774	0.000662422	0.000332309	4.4532	3.18974	2.81257	2.76732	20.9051	8.12446	6.02536	5.80841	3458	5358	801	3409	3256.5	monocyte
MYO1G	246177	0.115158	5.50609e-07	0.000200222	0.000166697	3.59612	3.47431	2.96666	3.18095	11.0932	10.114	6.81726	8.06902	5080	4704	697	2571	3263	monocyte
FAM65B	193385	0.00761326	3.00326e-07	0.000795534		4.0148	3.39806	2.94241		15.165	9.54185	6.68696		4214	4882	715		3270.33	monocyte
TMEM154	320782	0.0176802	5.49928e-05	0.000405597		3.68765	3.68444	3.00646		11.8852	11.8566	7.0359		4895	4268	678		3280.33	monocyte
GYG	27357	0.141426	0.00533579	0.00064146	0.00180931	4.68383	3.48237	2.54562	2.46386	24.7023	10.1763	4.83861	4.51691	3145	4688	1009	4291	3283.25	monocyte
TNFRSF11A	21934	0.0215257	0.00364603	0.000709417	0.00050074	0.171012	0.0901849	0.249334	0.156703	-7.94611	-15.5023	-5.30058	-8.71558	6311	3570	924	2377	3295.5	microglia
SULF2	72043	0.0148584	4.47985e-05	0.000144539	6.69683e-05	3.85652	3.39424	3.01917	2.92246	13.4853	9.51397	7.10703	6.58139	4524	4896	671	3095	3296.5	monocyte
RTN1	104001	0.0798019	0.0105061	0.00155284	1.18621e-05	0.161512	0.101314	0.280293	0.140894	-8.44177	-13.7457	-4.66327	-9.74769	6074	3870	1046	2199	3297.25	microglia
POU6F1	19009	0.0404458	0.00180358	0.00423736	0.00990449	0.0139487	0.0108309	0.483002	0.497387	-102.93	-132.702	-2.51478	-2.42922	1191	734	2358	8920	3300.75	microglia
CHAF1A	27221	0.684526	0.0137939	0.00152476	0.00245235	4.12041	3.73608	2.39078	2.60519	16.3927	12.3252	4.24439	5.08473	4034	4142	1166	3867	3302.25	monocyte
CHEK1	12649	0.0302278	0.25171	0.00335423	0.00340068	5.47592	2.90686	2.41074	2.64823	43.5059	6.49984	4.31747	5.26897	2189	6171	1141	3732	3308.25	monocyte
WDR60	217935	0.721163	0.0146717	0.00145808	0.00978827	0.0895757	0.0700954	0.51126	0.239458	-15.611	-20.0859	-2.35131	-5.53866	4145	2937	2620	3546	3312	microglia
RGL1	19731	0.102783	0.0103427	0.00159281	0.000973535	0.174237	0.115158	0.21571	0.112218	-7.79013	-12.0346	-6.20057	-12.3627	6399	4206	778	1873	3314	microglia
IRAK3	73914	0.00576189	0.00205665	0.00155113	0.00200907	4.2844	2.98056	2.92424	3.03165	18.4865	6.89292	6.59073	7.17743	3755	5950	723	2862	3322.5	monocyte
ZFHX3	11906	0.467628	0.00238572	0.000918266	0.00104138	0.124838	0.0893233	0.300552	0.236233	-11.0637	-15.6566	-4.3175	-5.62073	5089	3547	1140	3521	3324.25	microglia
PAG1	94212	0.0110653	0.0349113	0.000218012	9.27964e-05	0.177443	0.0974194	0.215603	0.147628	-7.64071	-14.3147	-6.20391	-9.28098	6472	3776	777	2274	3324.75	microglia
SDK1	330222	0.593262	0.0172215	0.000924938	0.00347684	0.0072711	0.0828095	0.50457	0.406834	-197.915	-16.9266	-2.38834	-3.06962	748	3354	2549	6667	3329.5	microglia
ST3GAL1	20442	0.00443392	0.00316491	0.000733151	0.000922466	4.27802	3.16757	2.55245	2.89071	18.4005	7.9853	4.86629	6.41636	3764	5430	1002	3142	3334.5	monocyte
LBR	98386	0.266132	0.0388973	0.000132608	0.000173909	3.93092	3.00964	3.08729	3.21917	14.2519	7.05364	7.49896	8.31254	4362	5868	644	2467	3335.25	monocyte
PHYHD1	227696	0.374769	0.0367863	7.17958e-05	0.000602071	0.0278495	0.3968	0.0607056	0.0723134	-51.3049	-3.15871	-23.2689	-19.4548	1944	9852	179	1378	3338.25	microglia
STAU2	29819	0.269896	5.85176e-05	0.000819117	0.0011169	0.155306	0.0825102	0.334088	0.185094	-8.79835	-16.9898	-3.83759	-7.30506	5891	3347	1305	2813	3339	microglia
IL1RL2	107527	0.202082	0.0139142	0.000539918	0.000797936	0.219993	0.0811243	0.209046	0.114288	-6.07061	-17.2885	-6.41339	-12.13	7419	3298	746	1897	3340	microglia
SLCO3A1	108116	0.363709	1.51747e-05	0.000660912	0.000251295	9.9259	7.70846	1.75623	1.69934	971.732	208.159	2.37814	2.24753	227	490	2565	10102	3346	monocyte
DCK	13178	0.0359066	0.106555	0.00157672	0.000571528	3.95517	2.83371	3.1628	3.54702	14.5105	6.12903	7.95563	10.6885	4319	6384	609	2085	3349.25	monocyte
D330045A20RIK	102871	0.676322	0.0013944	0.00401766	0.000332309	0.159431	0.0490435	0.400287	0.230096	-8.5582	-28.9195	-3.12725	-5.78326	6012	2285	1687	3424	3352	microglia
SLC28A2	269346	0.588756	2.16728e-08	0.00206607	0.0352608	10.0368	8.36705	2.10882	1.62152	1049.43	329.167	3.31339	2.07698	214	316	1562	11358	3362.5	monocyte
ACOT7	70025	0.0372968	0.0365389	0.000756646	0.00227357	4.68159	3.08868	2.44781	2.69877	24.6625	7.50716	4.45588	5.4925	3150	5649	1097	3571	3366.75	monocyte
CD40	21939	0.170577	0.000637911	0.00194359	0.0124047	5.63689	4.38999	1.9804	2.02342	48.7591	19.9661	2.94603	3.06547	2017	2953	1835	6672	3369.25	monocyte
GFM2	320806	0.0803108	0.0200961	0.000864889	0.000380442	0.0654886	0.124277	0.452483	0.241287	-21.5335	-11.1159	-2.71449	-5.49309	3394	4452	2066	3566	3369.5	microglia
MAG	17136	0.0304794	0.0497808	0.0112149	0.00421477	0.0872295	0.111334	0.480058	0.192027	-16.0441	-12.4647	-2.53293	-7.02405	4085	4119	2321	2961	3371.5	microglia
ZFP658	210104	0.0553489	0.0271815	0.00510947	0.00544628	0.184127	0.0955784	0.284407	0.136396	-7.34594	-14.5999	-4.58905	-10.0851	6619	3722	1069	2149	3389.75	microglia
RELL1	100532	0.0208191	0.0226427	0.000178615	0.000181172	3.95546	3.3262	2.44056	2.91888	14.5136	9.02966	4.42852	6.56258	4317	5032	1105	3109	3390.75	monocyte
RAD18	58186	0.0681526	3.03202e-05	0.00499316	0.00616235	4.45051	3.23918	2.41982	2.64793	20.8644	8.44259	4.35103	5.26769	3466	5244	1130	3733	3393.25	monocyte
JUP	16480	0.500173	0.00291919	0.00217542	0.000782501	0.123561	0.140886	0.293873	0.172713	-11.1831	-9.74829	-4.42621	-7.86309	5063	4818	1107	2644	3408	microglia
IL2RG	16186	0.0261323	0.98785	5.95501e-05	0.000131854	4.02201	2.89032	2.81829	3.2071	15.246	6.41437	6.05325	8.2349	4197	6223	795	2475	3422.5	monocyte
RBMS1	56878	0.028516	4.2813e-05	0.00281768	0.000662047	3.95779	3.39626	2.40086	2.78691	14.5387	9.52877	4.28117	5.90148	4313	4891	1153	3362	3429.75	monocyte
RNASE6	78416	0.00730537	0.129365	0.00208846	0.00160121	4.42457	2.85433	2.7318	2.96388	20.4747	6.23166	5.64282	6.8022	3509	6321	861	3056	3436.75	monocyte
STX3	20908	0.0308496	0.00712503	0.00121054	0.000284631	3.94256	2.91146	2.33704	3.52219	14.3755	6.52378	4.05266	10.4891	4346	6154	1216	2094	3452.5	monocyte
ADD3	27360	0.0114189	0.0252	0.000737345	5.83919e-05	4.02339	3.04703	2.8661	2.91997	15.2615	7.26509	6.29091	6.5683	4196	5767	764	3104	3457.75	monocyte
ME2	107029	0.00972329	0.0431008	0.000446768	0.000318498	3.65944	3.01706	3.09918	3.27447	11.6357	7.09514	7.56933	8.67638	4940	5853	639	2402	3458.5	monocyte
CD52	23833	0.131722	0.0442532	0.00179333	0.00132142	4.88206	3.64912	2.09618	2.28312	28.4881	11.5457	3.27576	3.8673	2911	4354	1585	4991	3460.25	monocyte
MFSD7A	243197	0.0178302	0.0984748	0.00254597	0.00959048	4.44191	3.3034	2.33521	2.52367	20.7344	8.87242	4.04626	4.75043	3476	5089	1218	4064	3461.75	monocyte
TIAM1	21844	0.0386261	0.000447657	0.000151947	2.26912e-06	3.7845	3.07179	2.86779	3.10793	12.7799	7.40813	6.29944	7.62147	4674	5691	763	2724	3463	monocyte
STAT4	20849	0.0375672	0.0335121	0.0125606	0.00417386	6.02675	5.77268	2.10474	1.76074	64.1978	53.67	3.3012	2.38873	1665	1473	1569	9151	3464.5	monocyte
FEN1	14156	0.193321	0.00088966	0.00860575	0.00843287	3.17867	4.22675	1.99971	3.13768	8.05471	17.7232	2.99921	7.80105	6258	3236	1796	2662	3488	monocyte
ABHD3	106861	0.756455	0.00174694	0.000733151	0.000640682	0.0705379	0.0497262	0.441402	0.377241	-19.9568	-28.5157	-2.79389	-3.34609	3573	2309	1988	6083	3488.25	microglia
APOBEC2	11811	0.0359323	0.124064	0.00400896	0.00148374	0.0481287	0.0548913	0.479968	0.39388	-29.4786	-25.7859	-2.53349	-3.1855	2856	2491	2319	6413	3519.75	microglia
EEF2K	13631	0.256016	0.00206293	0.00157094	0.000782501	0.227413	0.106172	0.251628	0.0871262	-5.85708	-13.0944	-5.24798	-16.0637	7579	3994	932	1574	3519.75	microglia
KLF10	21847	0.0263551	0.0192919	0.00102499	0.00050074	4.31276	2.72291	2.77066	3.05805	18.8733	5.60201	5.82421	7.32846	3706	6746	836	2805	3523.25	monocyte
ASPH	65973	0.00576189	4.36597e-13	0.00143278	0.00147364	0.188447	0.102381	0.240113	0.169091	-7.16661	-13.5974	-5.52227	-8.04182	6742	3892	882	2583	3524.75	microglia
DBI	13167	0.106097	0.000124283	0.00247668	0.00156949	4.28064	3.31458	2.13885	2.63672	18.4357	8.94917	3.40412	5.21915	3759	5062	1505	3775	3525.25	monocyte
NEO1	18007	0.32818	0.00342806	0.000938915	0.000470329	0.0755926	0.0422291	0.368238	0.413189	-18.5895	-33.6659	-3.43909	-3.01545	3738	2062	1491	6827	3529.5	microglia
PRMT2	15468	0.114898	0.01306	0.00434632	0.0116235	0.102881	0.0819298	0.432587	0.295295	-13.5289	-17.1137	-2.85999	-4.40266	4516	3324	1918	4380	3534.5	microglia
GRB14	50915	0.0247506	0.00820448	0.0013947	0.0074452	7.0532	4.7269	2.05207	1.77473	131.808	25.4813	3.14699	2.42174	997	2517	1668	8964	3536.5	monocyte
SKIL	20482	0.00177624	9.3291e-07	0.000151947	0.000171849	0.183726	0.104146	0.228547	0.180194	-7.36302	-13.3587	-5.82566	-7.51678	6610	3945	835	2761	3537.75	microglia
1700006J14RIK	321010	0.0174849	0.0459054	0.000825611	0.0117291	6.36072	4.27527	1.93384	1.88427	81.1804	18.3636	2.82071	2.69166	1397	3127	1957	7717	3549.5	monocyte
FGD2	26382	0.278892	0.00012458	0.000819117	5.7762e-05	0.170286	0.117919	0.227824	0.185093	-7.98201	-11.7414	-5.84566	-7.30515	6292	4308	830	2812	3560.5	microglia
TMPO	21917	0.028516	8.55017e-05	5.95501e-05	1.15446e-05	3.487	3.33093	2.91745	2.85628	10.2122	9.06256	6.55509	6.24146	5324	5023	726	3194	3566.75	monocyte
ZFP2	22678	0.416169	0.000984919	0.000517726	0.00229668	0.0632918	0.0346202	0.428392	0.438592	-22.298	-41.174	-2.89241	-2.81467	3331	1785	1881	7277	3568.5	microglia
CYP4F16	70101	0.0301751	0.213453	0.00367442	0.0144917	3.96342	3.20681	2.19321	2.82273	14.5994	8.23305	3.57322	6.075	4304	5307	1413	3276	3575	monocyte
SETD8	67956	0.028516	0.00140212	0.000993062	0.00010937	3.46026	3.02911	2.77416	3.39011	10.0063	7.16304	5.84078	9.48392	5410	5819	831	2243	3575.75	monocyte
GM14446	667373	0.0191719	0.0471816	0.00865126	0.0395806	5.29899	3.4589	2.68303	2.08786	38.369	9.99596	5.42203	3.25116	2388	4741	898	6276	3575.75	monocyte
CLEC7A	56644	0.0123258	0.0901399	0.000519596	0.000615626	4.04568	3.04982	2.49966	2.79004	15.5147	7.28108	4.6555	5.91651	4156	5762	1050	3355	3580.75	monocyte
TMEM64	100201	0.00941298	0.0190116	0.000405597	0.000916538	0.198066	0.0941444	0.336773	0.152747	-6.79534	-14.8297	-3.80331	-8.95382	6964	3683	1318	2359	3581	microglia
MEGF9	230316	0.0304503	0.10726	0.00156271	0.00170889	3.84362	2.7917	2.74956	3.22111	13.3564	5.92444	5.72514	8.32502	4550	6507	847	2461	3591.25	monocyte
ZFP30	22693	0.496191	0.00308575	0.000844275	0.00393912	0.079671	0.022482	0.502661	0.405616	-17.6128	-63.6724	-2.39909	-3.0802	3874	1332	2536	6645	3596.75	microglia
LILRB4	14728	0.108743	0.0001032	0.00064897	0.000210746	4.31693	2.62953	2.6121	3.10488	18.9309	5.18825	5.11392	7.60322	3697	7059	955	2730	3610.25	monocyte
MYCL1	16918	0.607433	0.0332661	0.00143025	0.00201456	0.170542	0.0708562	0.414772	0.229438	-7.96933	-19.865	-3.00221	-5.80121	6300	2963	1791	3419	3618.25	microglia
BCL11A	14025	0.080561	0.000278181	0.00122073	0.00563511	5.0506	2.82174	2.46822	2.45588	32.1423	6.07014	4.53361	4.48646	2674	6413	1085	4316	3622	monocyte
VANGL1	229658	0.561418	0.00619159	0.00412649	0.00688629	0.0229068	0.0173677	0.5715	0.479966	-62.4823	-82.5688	-2.05733	-2.5335	1700	1073	3327	8394	3623.5	microglia
ABHD12	76192	0.0525667	0.000855725	0.00274722	0.000331213	0.195507	0.112456	0.17625	0.18862	-6.89055	-12.3355	-7.6957	-7.15958	6900	4140	629	2867	3634	microglia
FUT10	171167	0.628023	0.0333698	0.00154996	0.000329978	0.146836	0.0631381	0.472628	0.260028	-9.33372	-22.3535	-2.57975	-5.06324	5678	2742	2240	3883	3635.75	microglia
FMN1	14260	0.773682	0.000572356	0.00231391	0.00492443	0.0865287	0.128039	0.452493	0.264293	-16.178	-10.7751	-2.71442	-4.97397	4066	4530	2067	3947	3652.5	microglia
FLT3	14255	0.233746	0.00780189	0.0295784	0.0415997	4.0656	3.53411	2.28033	2.37647	15.7444	10.5844	3.85789	4.19266	4127	4578	1292	4623	3655	monocyte
SYNE2	319565	0.0201875	1.64864e-05	0.000497135	0.00066211	3.81048	3.73422	2.61491	2.29211	13.0304	12.308	5.12583	3.89771	4618	4143	952	4948	3665.25	monocyte
CDH23	22295	0.507366	0.0169975	0.00257815	0.00219225	0.129053	0.087512	0.422691	0.281582	-10.6865	-15.9907	-2.9375	-4.63979	5179	3494	1845	4151	3667.25	microglia
GEN1	209334	0.0422187	0.212325	0.00322353	0.000627316	4.04153	2.60778	3.23628	3.05937	15.4673	5.09566	8.42362	7.33606	4166	7155	586	2803	3677.5	monocyte
ABCG2	26357	0.0211603	8.58495e-05	0.000637937	9.08177e-05	0.19417	0.13864	0.269219	0.131856	-6.94129	-9.91403	-4.87436	-10.4491	6869	4759	999	2108	3683.75	microglia
DUSP16	70686	0.0418853	0.00650884	0.000308673	0.000351239	0.201934	0.137166	0.27022	0.119823	-6.65606	-10.0258	-4.85456	-11.5472	7050	4732	1007	1968	3689.25	microglia
TUBB4B	227613	0.319096	0.0105012	0.000436829	0.00968122	4.26132	3.06721	2.6162	2.4531	18.1773	7.38151	5.13134	4.47593	3800	5713	950	4328	3697.75	monocyte
IER3	15937	0.247476	0.038892	0.0439808	0.0339517	0.235388	0.0555225	0.440012	0.168678	-5.6426	-25.4872	-2.80414	-8.06268	7751	2516	1978	2575	3705	microglia
SYCE2	71846	0.0625833	0.000227578	0.00624845	0.0155899	3.66834	4.19795	2.21	2.21108	11.714	17.3531	3.62674	3.63022	4918	3292	1389	5235	3708.5	monocyte
BTBD3	228662	0.0320872	0.0365551	0.000410926	0.00157635	0.179898	0.100599	0.351494	0.203169	-7.5299	-13.8469	-3.62474	-6.61271	6513	3851	1390	3088	3710.5	microglia
TFPI	21788	0.264206	0.010952	0.00472022	0.00902152	0.182566	0.153199	0.298149	0.133913	-7.41287	-8.92595	-4.35604	-10.2811	6573	5074	1128	2121	3724	microglia
NUMB	18222	0.0955701	0.000102818	9.12102e-05	2.68145e-05	0.174985	0.135474	0.221349	0.194375	-7.75477	-10.1571	-6.03052	-6.93345	6419	4691	799	2993	3725.5	microglia
THA1	71776	0.66672	0.00472433	0.0103805	0.00554035	0.0277905	0.0426672	0.546518	0.465909	-51.4149	-33.3152	-2.17129	-2.62338	1943	2075	3007	8022	3761.75	microglia
TAL1	21349	0.018179	0.00763786	0.00877438	0.0264875	0.134938	0.0459127	0.499636	0.336971	-10.1993	-30.9252	-2.41629	-3.80081	5327	2187	2504	5068	3771.5	microglia
POLQ	77782	0.0291301	0.00057702	0.00374602	0.00492368	5.46201	3.91093	2.05947	1.91963	43.0786	14.0421	3.16832	2.78327	2210	3808	1648	7426	3773	monocyte
POLA1	18968	0.0474371	0.109741	0.00371982	0.00127414	3.51993	2.65346	3.05621	3.35987	10.4711	5.29173	7.31784	9.26648	5247	6971	657	2275	3787.5	monocyte
ECT2	13605	0.342613	0.0044527	0.00210371	0.000496345	2.57668	3.47972	3.883	3.80536	4.96567	10.1558	13.7537	12.9807	8357	4692	344	1813	3801.5	monocyte
GM14085	381417	0.213096	0.000142612	0.0237855	0.0352608	8.02995	7.25364	1.74169	1.62152	260.369	151.604	2.34427	2.07698	617	659	2637	11364	3819.25	monocyte
A430078G23RIK	319493	0.0304794	0.0581885	0.00210625	0.00619473	6.19217	4.21379	3.37841	1.70205	72.1188	17.5557	9.39926	2.25362	1540	3259	522	10049	3842.5	monocyte
NFIA	18027	0.306662	5.26701e-06	0.00040914	0.000595694	0.119803	0.08607	0.222251	0.379065	-11.5492	-16.2669	-6.00413	-3.3278	4968	3457	805	6140	3842.5	microglia
AF251705	140497	0.199944	0.014513	0.00114078	0.00208688	0.19017	0.125212	0.237224	0.221022	-7.09734	-11.0292	-5.59527	-6.04013	6785	4478	872	3295	3857.5	microglia
TBC1D19	67249	0.0301751	0.0744893	0.00514619	0.00397186	0.205276	0.102393	0.341893	0.203628	-6.53994	-13.5957	-3.73946	-6.5967	7113	3893	1344	3093	3860.75	microglia
ERRFI1	74155	0.545675	0.0245794	0.00472852	0.00229668	0.227558	0.121116	0.24713	0.169057	-5.85303	-11.4187	-5.35207	-8.04354	7584	4377	914	2579	3863.5	microglia
MVD	192156	0.0352158		0.0029524	0.000504863	3.46439		1.9041	2.48257	10.0379		2.74274	4.58894	5395		2031	4174	3866.67	monocyte
ZFP90	22751	0.0349762	0.0217421	0.000841512	5.40524e-05	0.235522	0.124024	0.299334	0.143732	-5.63912	-11.1396	-4.33696	-9.54576	7755	4445	1135	2226	3890.25	microglia
FAM69A	67266	0.00761326	0.104568	0.00114078	0.000884819	3.90461	2.68381	2.53716	2.8307	13.9763	5.42552	4.80445	6.11419	4413	6870	1019	3266	3892	monocyte
ITPR1	16438	0.0478243	0.00642392	0.00191218	0.00185983	3.16252	3.02308	2.96502	3.09391	7.95392	7.12904	6.80835	7.53805	6308	5841	700	2755	3901	monocyte
MX1	17857	0.0350818	0.0109992	0.00145344	0.00203906	3.2076	2.8579	2.52125	3.48854	8.23813	6.2496	4.7408	10.2242	6171	6310	1028	2134	3910.75	monocyte
2610018G03RIK	70415	0.094097	0.0323104	0.00223407	0.00157635	3.96006	2.60184	2.5083	2.90541	14.5632	5.07058	4.68951	6.4923	4310	7174	1042	3122	3912	monocyte
RNASEH2B	67153	0.0224994	0.0834525	0.00247759	0.00032778	3.73018	2.89774	2.6976	2.62017	12.2707	6.45258	5.4872	5.14824	4791	6201	886	3823	3925.25	monocyte
DDX39	68278	0.0195413	0.000193056	0.00211791	0.000185671	3.37264	3.78426	1.94378	2.52038	9.35777	12.7777	2.84712	4.73733	5667	4059	1929	4067	3930.5	monocyte
KMO	98256	0.0313621	0.0231556	0.00500748	0.000974805	5.75011	3.70398	3.26758	1.76018	52.8216	12.032	8.6303	2.38741	1905	4207	571	9165	3962	monocyte
PQLC1	66943	0.0600649	0.0441908	0.004782	0.00626413	3.92891	2.4892	2.44527	3.06371	14.2307	4.61467	4.44627	7.36122	4370	7610	1100	2795	3968.75	monocyte
RAP2B	74012	0.0261189	0.273395	0.00413444	0.016889	3.89512	2.60264	2.12855	3.07382	13.8782	5.07398	3.37277	7.42001	4437	7172	1525	2788	3980.5	monocyte
TOPBP1	235559	0.0445307	0.12172	0.00232829	0.00143559	3.93874	2.66655	2.4583	2.70358	14.3349	5.3491	4.49569	5.51417	4353	6923	1094	3558	3982	monocyte
SVIL	225115	0.0254542	2.42103e-05	0.00063226	0.000567094	3.47585	2.90938	2.47256	2.79583	10.1259	6.51294	4.55028	5.94428	5354	6162	1079	3338	3983.25	monocyte
IVNS1ABP	117198	0.00366052	3.03809e-05	0.00169168	0.000181172	0.199339	0.119251	0.206665	0.262456	-6.74889	-11.6049	-6.49278	-5.01205	6995	4341	736	3908	3995	microglia
PLIN2	11520	0.0214471	0.00014585	0.00860896	0.0144843	3.43692	3.02792	2.434	2.69805	9.82972	7.15634	4.40391	5.48924	5474	5821	1113	3575	3995.75	monocyte
KIT	16590	0.532251	0.000283676	0.0384266	0.0338684	8.45185	5.43989	1.86923	1.60808	349.155	42.4081	2.65337	2.04845	504	1739	2153	11601	3999.25	monocyte
NLRC4	268973	0.00243982	0.277195	0.000368324	0.0493144	4.62194	2.77424	2.6472	2.19841	23.6231	5.84117	5.26448	3.58973	3232	6557	929	5296	4003.5	monocyte
AKR1C13	27384	0.0412362	0.422307	0.00279666	0.000431601	4.01081	2.41756	2.38349	3.09019	15.1203	4.34266	4.21797	7.51609	4221	7908	1169	2765	4015.75	monocyte
UNC13B	22249	0.0528298	0.0115332	0.00477684	0.00101616	0.0198338	0.0594361	0.54473	0.497599	-72.2403	-23.7765	-2.17985	-2.428	1535	2623	2980	8933	4017.75	microglia
MYBL1	17864	0.0632742	0.0124632	0.0197931	0.00136849	5.36752	3.63097	2.09807	1.87604	40.2844	11.3889	3.28137	2.67066	2316	4389	1580	7812	4024.25	monocyte
5730419I09RIK	74741	0.0272549	0.0120378	0.00280673	0.00104494	3.58433	2.61928	2.53683	3.02459	10.9947	5.14442	4.80312	7.1375	5109	7100	1020	2870	4024.75	monocyte
B430306N03RIK	320148	0.029369	0.0127788	0.00294673	0.00847214	3.74878	2.84754	2.22438	2.66406	12.4429	6.19771	3.6731	5.33815	4752	6341	1371	3683	4036.75	monocyte
CHST11	58250	0.0909623	0.0480029	0.000539918	0.00215249	0.279202	0.101008	0.300715	0.166303	-4.68334	-13.7889	-4.3149	-8.18473	8659	3863	1143	2486	4037.75	microglia
ARHGAP10	78514	0.377434	0.021454	0.00123251	0.0169546	5.50864	3.57549	2.201	1.84723	44.5267	10.9215	3.59797	2.59809	2143	4500	1404	8107	4038.5	monocyte
ARAP3	106952	0.183487	0.0128177	0.000972666	0.000694429	0.232604	0.11946	0.286653	0.202981	-5.71579	-11.5838	-4.54945	-6.61929	7685	4346	1080	3086	4049.25	microglia
DDAH2	51793	0.0291301	0.182279	0.00333791	0.00409905	0.266957	0.113794	0.361615	0.138046	-4.91963	-12.1847	-3.51046	-9.95873	8421	4173	1452	2157	4050.75	microglia
TSPAN9	109246	0.0355782	0.00248391	0.0148439	0.124782	0.0588359	0.0240595	0.513255	0.499293	-24.024	-59.465	-2.34046	-2.41826	3203	1384	2649	8991	4056.75	microglia
CENPI	102920	0.0402298	0.000352851	0.00441728	0.00323792	2.27165	4.39411	2.94241	3.10401	3.82874	20.0261	6.68695	7.59804	9841	2947	716	2738	4060.5	monocyte
PLCG1	18803	0.407937	0.00017732	0.00132164	0.00233223	0.274651	0.0893326	0.315732	0.191372	-4.76869	-15.6549	-4.08759	-7.04974	8571	3549	1208	2948	4069	microglia
MAGOHB	66441	0.040726	0.395287	0.00206997	0.000224847	4.13974	2.48269	2.5718	2.66825	16.6273	4.58937	4.94551	5.35659	4003	7639	980	3661	4070.75	monocyte
2510009E07RIK	72190	0.232339	0.0297125	0.00187872	0.0099553	0.163699	0.0717415	0.381035	0.373704	-8.32253	-19.6138	-3.30824	-3.3821	6131	2990	1566	5616	4075.75	microglia
FAM96A	68250	0.0249383	0.236819	0.001358	0.00245241	3.98725	2.65505	2.34797	2.60432	14.8592	5.29868	4.09108	5.08106	4268	6964	1206	3872	4077.5	monocyte
FCHSD2	207278	0.0424582	7.34473e-10	0.000864889	0.000375348	0.199296	0.108029	0.221612	0.303694	-6.75048	-12.861	-6.0228	-4.26802	6993	4039	803	4552	4096.75	microglia
CTNND2	18163	0.576863	0.000593237	0.00573528	0.000483255	0.088028	0.0549312	0.482392	0.44533	-15.8941	-25.7668	-2.51853	-2.76529	4104	2496	2344	7463	4101.75	microglia
NHSL2	100042480	0.00243982	0.0410869	0.00113412		3.6942	2.70095	3.10829		11.9439	5.50228	7.62359		4870	6805	638		4104.33	monocyte
NADK	192185	0.138591	0.00772784	0.00130534	0.000619494	3.72158	2.63677	2.51398	2.70054	12.1919	5.21937	4.71194	5.50043	4811	7037	1038	3561	4111.75	monocyte
SPRY1	24063	0.229768	0.00191808	0.00180648	0.00644585	0.0458418	0.0766172	0.567562	0.441987	-30.9738	-18.3343	-2.07462	-2.78961	2740	3136	3275	7396	4136.75	microglia
MEF2C	17260	0.0517046	8.16041e-05	0.000708862	0.000280412	0.244924	0.139525	0.227538	0.194419	-5.40451	-9.84813	-5.85359	-6.93177	7958	4786	827	2997	4142	microglia
LRP12	239393	0.117975	0.0250868	0.00881007	0.00565823	0.270341	0.126618	0.270121	0.170975	-4.85217	-10.9014	-4.85651	-7.94793	8487	4506	1006	2622	4155.25	microglia
CSDA	56449	0.0618819	0.0384971	0.00439389	0.00553641	3.24665	2.95038	2.68789	2.66772	8.4916	6.7295	5.44372	5.35424	6045	6034	893	3662	4158.5	monocyte
SLC39A8	67547	0.023719	0.0027483	0.00326704	0.000453548	0.219388	0.128703	0.382726	0.205797	-6.08867	-10.717	-3.29161	-6.52218	7408	4546	1574	3115	4160.75	microglia
P4HA1	18451	0.471407	0.00766623	0.00271819	0.00284502	0.256307	0.156431	0.240659	0.165396	-5.14358	-8.73161	-5.50867	-8.23222	8166	5141	883	2478	4167	microglia
SORL1	20660	0.0374987	0.108003	0.000265756	0.000161025	3.15266	2.6548	2.78353	3.18308	7.89291	5.29759	5.88534	8.08241	6340	6966	822	2566	4173.5	monocyte
FAM125B	72543	0.0501913	0.00778928	0.000274864	0.000101268	0.254462	0.108914	0.303171	0.225466	-5.18428	-12.7525	-4.27618	-5.91175	8124	4066	1154	3356	4175	microglia
ST8SIA6	241230	0.322478	0.0111605	0.00670887	0.0108189	0.154282	0.0671302	0.389103	0.392585	-8.85994	-20.9949	-3.23019	-3.19752	5865	2863	1611	6371	4177.5	microglia
MYO5A	17918	0.0215517	1.46156e-11	0.000924938	0.000287143	3.1044	3.2841	2.39451	2.56096	7.60035	8.7412	4.25798	4.901	6484	5137	1163	3986	4192.5	monocyte
CPT1A	12894	0.0490497	0.301709	0.00231358	0.00111214	3.6973	2.55176	2.53831	2.67384	11.9717	4.8635	4.80908	5.38125	4863	7358	1014	3645	4220	monocyte
FRMD4A	209630	0.0362957	9.44657e-09	0.00064897	0.0014745	0.277652	0.105422	0.221728	0.235601	-4.71209	-13.1911	-6.0194	-5.63707	8627	3974	804	3502	4226.75	microglia
AIF1	11629	0.104853	0.0226419	0.00151612	0.000438806	0.258669	0.104658	0.266838	0.252786	-5.09231	-13.291	-4.92204	-5.22176	8230	3953	987	3774	4236	microglia
PLD1	18805	0.0665579	1.32237e-06	0.00467302	0.00173008	0.235264	0.150807	0.252302	0.221477	-5.64582	-9.07524	-5.23268	-6.02673	7746	5011	935	3303	4248.75	microglia
STARD4	170459	0.0147303	0.273408	0.00442454	0.00225602	4.24115	2.58397	1.79359	2.73054	17.911	4.99587	2.46678	5.63704	3826	7241	2430	3509	4251.5	monocyte
DENND2C	329727	0.0066362	0.0713379	0.00156364	0.000630254	0.22002	0.12512	0.429735	0.21937	-6.06981	-11.0377	-2.88196	-6.0892	7420	4475	1890	3270	4263.75	microglia
MXD3	17121	0.049895	0.0983986	0.00256057	0.0212395	4.59171	3.67863	1.81835	1.93434	23.1125	11.805	2.52677	2.82204	3271	4282	2331	7261	4286.25	monocyte
E2F1	13555	0.139363	0.00479613	0.00498129	0.00807986	5.03838	3.98075	1.73216	1.84598	31.8627	14.788	2.32224	2.59496	2687	3696	2679	8122	4296	monocyte
G6PDX	14381	0.0550835	0.0134995	0.000962426	0.000375348	3.55356	2.59493	2.58354	2.59631	10.7416	5.04159	4.99409	5.04739	5163	7197	969	3886	4303.75	monocyte
CLSPN	269582	0.213696	0.00991105	0.00301234	0.0027102	2.28157	3.47581	3.17333	3.48211	3.86208	10.1256	8.02127	10.1743	9780	4701	605	2139	4306.25	monocyte
ANXA6	11749	0.194825	0.0335305	0.000528973	0.000226112	3.87802	2.31934	2.52431	2.76053	13.7029	3.99104	4.75298	5.77645	4465	8372	1026	3433	4324	monocyte
ST8SIA4	20452	0.0402921	0.259568	0.00223111	0.00148944	3.5738	2.55424	2.5375	2.63143	10.9075	4.87356	4.80582	5.1964	5133	7346	1018	3804	4325.25	monocyte
PLAU	18792	0.195434	0.0371671	0.0106222	0.00340736	0.217309	0.133865	0.338527	0.271619	-6.15146	-10.2849	-3.78122	-4.82714	7363	4660	1325	4025	4343.25	microglia
SNX29	74478	0.0539247	0.0022264	0.00311735	0.00332817	0.261316	0.16274	0.320667	0.173762	-5.03597	-8.37444	-4.01756	-7.81276	8290	5262	1226	2658	4359	microglia
FGL2	14190	0.00761326	0.43394	0.00186903	0.00139421	3.47661	2.40859	2.64323	2.8549	10.1318	4.30956	5.2473	6.23454	5351	7948	933	3205	4359.25	monocyte
RALGPS1	241308	0.516517	0.00128058	0.00287251	0.00293744	0.281551	0.125047	0.348266	0.190834	-4.64035	-11.0444	-3.66261	-7.07097	8720	4472	1375	2923	4372.5	microglia
STX1A	20907	0.0986853	0.00327764	0.00831741	0.0340301	0.150844	0.0195273	0.532119	0.455012	-9.07284	-73.3821	-2.24189	-2.69692	5791	1177	2841	7700	4377.25	microglia
MFNG	17305	0.717402	0.00589651	0.00622182	0.00347684	0.160276	0.124058	0.429076	0.34613	-8.5106	-11.1363	-2.88707	-3.68805	6032	4446	1884	5166	4382	microglia
BMP2K	140780	0.0167807	0.000516572	0.000980942	0.000117478	0.251908	0.135551	0.282965	0.250002	-5.24162	-10.151	-4.61484	-5.28517	8073	4693	1063	3716	4386.25	microglia
TPM4	326618	0.00761326	0.0218276	0.000864889	0.000590093	3.58545	2.55138	2.37738	2.5871	11.0041	4.86193	4.19592	5.0089	5107	7361	1178	3917	4390.75	monocyte
KCNIP3	56461	0.230659	0.000689972	0.00420954	0.00841688	0.217857	0.143458	0.374278	0.253876	-6.13479	-9.56488	-3.37621	-5.19734	7371	4875	1522	3799	4391.75	microglia
LRRC39	109245	0.611625	0.0236745	0.00240683	0.00111219	0.249256	0.101235	0.286216	0.308404	-5.30239	-13.7569	-4.55711	-4.19574	8030	3868	1077	4613	4397	microglia
TUBGCP5	233276	0.282183	0.00726344	0.001068	0.000163841	0.289558	0.158269	0.226155	0.177297	-4.49912	-8.62461	-5.89228	-7.6474	8901	5183	820	2716	4405	microglia
MAML3	433586	0.411488	0.0488821	0.00304136	0.00627301	0.19881	0.146885	0.436047	0.257386	-6.76812	-9.33044	-2.83372	-5.12004	6981	4944	1942	3835	4425.5	microglia
C1GALT1C1	59048	0.0281321	0.227851	0.00131632	0.00376509	3.33612	2.47475	2.77167	2.71388	9.09889	4.5587	5.82899	5.56083	5778	7673	834	3544	4457.25	monocyte
EPHX1	13849	0.62881	0.023328	0.00510947	0.000311881	0.0713439	0.0715716	0.285115	0.534934	-19.7258	-19.6615	-4.57651	-2.22779	3595	2985	1072	10235	4471.75	microglia
RASSF3	192678	0.00683439	0.273377	0.00575189	0.00127414	3.58239	2.48893	2.33779	2.57599	10.9786	4.61361	4.05528	4.96281	5117	7612	1214	3959	4475.5	monocyte
TYMS	22171	0.16271	0.0216263	0.00435717	0.00984849	3.11982	2.6003	2.40762	2.89213	7.69278	5.06415	4.30597	6.42366	6439	7178	1146	3140	4475.75	monocyte
PLOD1	18822	0.279236	0.00289782	0.00433215	0.00443374	0.256886	0.135313	0.327399	0.253074	-5.13092	-10.1698	-3.92544	-5.21527	8179	4690	1268	3781	4479.5	microglia
MPP1	17524	0.0206678	0.181378	0.00303141	0.00404655	3.69667	2.46995	2.30845	2.51276	11.9661	4.54024	3.95351	4.7071	4864	7705	1253	4109	4482.75	monocyte
NRIP1	268903	0.0210257	3.52315e-07	0.00376231	0.000370096	0.220718	0.113051	0.432953	0.297952	-6.04913	-12.2679	-2.85719	-4.35924	7434	4156	1921	4420	4482.75	microglia
KLHL7	52323	0.142501	0.0459271	0.00200998	0.00106352	0.238823	0.138079	0.351684	0.26794	-5.55464	-9.95631	-3.62254	-4.89988	7837	4749	1392	3990	4492	microglia
SAMHD1	56045	0.0178302	4.69117e-05	0.000517726	0.000363182	3.1313	2.81698	2.42414	2.53015	7.76222	6.04684	4.36709	4.77631	6416	6425	1125	4057	4505.75	monocyte
B4GALT4	56375	0.0660361	0.023664	0.00216692	0.000190113	0.251089	0.172347	0.341748	0.214996	-5.26024	-7.88082	-3.74124	-6.22272	8053	5476	1343	3207	4519.75	microglia
ZFP770	228491	0.229768	0.0173612	0.00162876	0.00140036	0.22009	0.135998	0.39531	0.290112	-6.06772	-10.1161	-3.17234	-4.48965	7423	4702	1643	4314	4520.5	microglia
GNS	75612	0.0962053	0.02396	0.000864889	0.000363182	0.232689	0.148682	0.30127	0.289977	-5.71354	-9.21179	-4.3061	-4.49193	7687	4973	1145	4313	4529.5	microglia
CCL6	20305	0.0776239	0.0241404	0.00442454	0.00141095	3.3651	2.5463	2.18947	2.65604	9.30378	4.84133	3.56138	5.30301	5688	7379	1422	3704	4548.25	monocyte
CDS1	74596	0.0506024	0.0396726	0.00102028	0.000131298	0.271182	0.13934	0.371844	0.230695	-4.83567	-9.86183	-3.4013	-5.767	8508	4779	1508	3445	4560	microglia
H2AFZ	51788	0.0178302	0.00732567	0.000528973		3.72315	2.53164	2.16912		12.2063	4.78227	3.49748		4801	7440	1458		4566.33	monocyte
LASS6	241447	0.0206678	0.0405325	0.00119823	0.000965731	3.28218	2.51911	2.54198	2.60615	8.72828	4.7323	4.82387	5.08878	5919	7483	1010	3866	4569.5	monocyte
DEK	110052	0.0424724	0.0473903	0.00120478	0.000559687	3.52962	2.74153	2.25489	2.26037	10.5484	5.68781	3.77298	3.79113	5225	6678	1329	5074	4576.5	monocyte
CSF1R	12978	0.0933651	0.000214422	0.000330404	0.000224847	0.187571	0.115318	0.326905	0.382615	-7.2023	-12.0173	-3.93206	-3.29269	6703	4209	1263	6204	4594.75	microglia
SLC35C1	228368	0.0330923	0.124696	0.000949724	0.000692745	3.59623	2.67986	2.0863	2.32148	11.0941	5.40792	3.24658	3.99845	5079	6888	1596	4827	4597.5	monocyte
RPTOR	74370	0.0351845	5.16992e-05	0.00248108	0.00101946	0.247816	0.171202	0.367314	0.238578	-5.33596	-7.93672	-3.44888	-5.56083	8009	5450	1482	3542	4620.75	microglia
8430419L09RIK	74525	0.80485	0.0142887	0.0030326	0.000640682	0.102778	0.104303	0.567706	0.410731	-13.543	-13.3378	-2.07398	-3.0362	4511	3948	3278	6767	4626	microglia
CDC42EP3	260409	0.0114267	0.515078	0.00210371	0.00179895	3.71959	1.98109	2.80778	3.15064	12.1737	2.94792	6.00208	7.88051	4815	10311	807	2637	4642.5	monocyte
FBXO5	67141	0.0288379	0.471311	0.000550032	8.00381e-05	3.66668	1.89549	2.69268	3.73521	11.6994	2.72049	5.46514	12.3171	4921	10891	889	1882	4645.75	monocyte
CTDSPL	69274	0.0131991	0.607979	0.00117381	0.000422592	3.60312	2.38578	1.97206	2.67353	11.152	4.22626	2.92327	5.3799	5069	8022	1855	3646	4648	monocyte
FOXN2	14236	0.00443392	0.146339	0.000733151	0.0010538	3.19285	2.41111	2.31812	2.85114	8.14413	4.31884	3.98681	6.21571	6213	7935	1242	3215	4651.25	monocyte
ZFP420	233058	0.717889	0.0292615	0.0265587	0.00577052	0.226348	0.094524	0.473591	0.341496	-5.88685	-14.7682	-2.57359	-3.74434	7556	3699	2247	5124	4656.5	microglia
ZFP354C	30944	0.595063	0.0148707	0.00844652	0.00185429	0.174877	0.0388853	0.430511	0.478605	-7.75987	-36.6035	-2.87595	-2.54196	6418	1948	1899	8363	4657	microglia
PQLC3	217430	0.00573107	0.175432	0.00169337	0.000740884	3.1706	2.00267	3.8039	3.75282	8.00422	3.00741	12.9666	12.4807	6280	10171	358	1870	4669.75	monocyte
ST3GAL5	20454	0.0304794	0.0408989	0.00130534	0.000495289	0.331193	0.179849	0.248022	0.161951	-3.87517	-7.53208	-5.33113	-8.41757	9751	5632	920	2435	4684.5	microglia
SMAD3	17127	0.168345	0.000249367	0.000606418	0.000721646	0.287425	0.115732	0.345509	0.294058	-4.53596	-11.9725	-3.6955	-4.42313	8848	4232	1366	4360	4701.5	microglia
DNASE1L1	69537	0.018316	0.271496	4.64827e-05	5.38331e-05	4.18611	1.95925	2.2044	2.87915	17.203	2.8886	3.60884	6.35716	3924	10451	1398	3162	4733.75	monocyte
FMNL2	71409	0.0280398	0.00238278	0.00217915	0.00126302	0.281044	0.182986	0.352454	0.212126	-4.64957	-7.39475	-3.61362	-6.31337	8700	5700	1397	3176	4743.25	microglia
DAP	223453	0.0243464	0.381091	0.000978141	0.000242342	3.2342	2.34848	2.44467	2.691	8.41006	4.09287	4.44402	5.45763	6091	8199	1101	3589	4745	monocyte
CDC42EP2	104252	0.0379171	0.657646	0.0169129	0.0231095	3.83708	2.21265	1.94168	2.68164	13.2915	3.63527	2.84153	5.41587	4561	8925	1935	3611	4758	monocyte
UTRN	22288	0.00761326	0.364237	0.00112286	0.000330236	3.22991	2.32498	2.41477	2.75858	8.38211	4.01058	4.33233	5.76729	6104	8350	1136	3442	4758	monocyte
ARHGAP12	75415	0.178565	0.0139102	0.00561863	0.00129274	0.322829	0.172102	0.281524	0.196346	-3.98755	-7.89272	-4.64084	-6.85902	9590	5471	1055	3031	4786.75	microglia
ENPP4	224794	0.367307	0.00189966	0.000756646	0.00133137	0.236382	0.114072	0.519795	0.301035	-5.61689	-12.1538	-2.30547	-4.30982	7778	4183	2713	4507	4795.25	microglia
PFKFB3	170768	0.309907	8.82496e-06	0.0030446	0.00147599	0.324137	0.157188	0.31571	0.21639	-3.96958	-8.68721	-4.0879	-6.17959	9622	5158	1207	3225	4803	microglia
ALDH1B1	72535	0.00803108	0.177907	0.0094879	0.0338293	3.95672	3.49267	2.87037	1.7361	14.5271	10.2564	6.31252	2.33134	4314	4666	760	9478	4804.5	monocyte
SASH1	70097	0.034213	0.286137	0.0170779	0.0144163	4.15792	2.8988	1.77006	2.04599	16.8509	6.45808	2.41069	3.12957	3970	6196	2511	6551	4807	monocyte
KLF7	93691	0.270589	0.00123227	0.000842609	0.000391183	0.273716	0.159828	0.365846	0.268141	-4.78657	-8.53577	-3.46456	-4.89584	8559	5212	1475	3992	4809.5	microglia
DCLK2	70762	0.179033	0.0119316	0.00119823	0.00131746	0.115669	0.0609849	0.546343	0.489896	-11.9793	-23.1601	-2.17212	-2.47314	4861	2672	3002	8734	4817.25	microglia
CSNK1E	27373	0.0292508	0.000686942	0.00235763	0.000871297	0.313468	0.148608	0.308105	0.251509	-4.12046	-9.21666	-4.20027	-5.25068	9393	4972	1174	3748	4821.75	microglia
ZEB1	21417	0.012513	0.106432	0.00730403	0.00571189	0.244107	0.166256	0.465977	0.259486	-5.42419	-8.18717	-2.62294	-5.0748	7941	5329	2186	3875	4832.75	microglia
IFT57	73916	0.0272549	0.092205	0.00102499	0.000572274	3.23867	2.37237	2.19204	2.64161	8.43924	4.1779	3.56951	5.24029	6075	8087	1416	3757	4833.75	monocyte
FAM115A	77574	0.190492	0.0238132	0.00607372	0.021483	0.265933	0.0533696	0.399616	0.413916	-4.94039	-26.5352	-3.13326	-3.00935	8392	2432	1684	6843	4837.75	microglia
SPATA13	219140	0.0114189	0.0138994	0.00377488		0.276588	0.136471	0.323086		-4.73202	-10.0793	-3.98401		8613	4713	1245		4857	microglia
SMO	319757	0.0324305	0.0454328	0.00112627	0.000412294	0.247509	0.111367	0.479741	0.333579	-5.34315	-12.4608	-2.53489	-3.84414	7999	4120	2315	5022	4864	microglia
SLC39A14	213053	0.743776	0.00062413	0.00270292	0.000720274	0.188267	0.082973	0.486837	0.425013	-7.17391	-16.8923	-2.49147	-2.91898	6729	3360	2396	7050	4883.75	microglia
IFFO1	320678	0.32682	0.00550514	0.00176582	0.000487741	0.282571	0.179426	0.382895	0.245025	-4.62192	-7.55098	-3.28995	-5.40211	8743	5621	1577	3612	4888.25	microglia
EPB4.1L3	13823	0.190361	0.00145779	0.00438824	0.0141518	0.360295	0.138278	0.385534	0.186558	-3.525	-9.94124	-3.26432	-7.24404	10399	4752	1587	2832	4892.5	microglia
TSPAN3	56434	0.0410345	0.129558	0.0133042	0.0155019	0.269778	0.169112	0.415169	0.262615	-4.86329	-8.04078	-2.99891	-5.00874	8470	5404	1797	3918	4897.25	microglia
CCDC46	76380	0.189227	0.000294547	0.00434396	0.0124235	0.226092	0.149856	0.479368	0.321114	-5.89408	-9.13587	-2.53722	-4.01131	7549	4993	2311	4786	4909.75	microglia
MMS22L	212377	0.0763082	0.00633171	0.00937242	0.0062952	3.07918	2.6914	2.34871	2.25407	7.45135	5.45938	4.09367	3.77026	6550	6845	1205	5089	4922.25	monocyte
NAP1L1	53605	0.0424582	0.0858041	0.00154621	0.00134371	3.62842	2.92433	2.65534	1.87785	11.3669	6.59122	5.29997	2.67526	5021	6115	925	7794	4963.75	monocyte
ULK2	29869	0.0224905	0.0212313	0.000309627	0.000108578	0.308345	0.163582	0.330062	0.271946	-4.19663	-8.32887	-3.89003	-4.82078	9289	5276	1280	4026	4967.75	microglia
SLC16A6	104681	0.170736	0.0494294	0.000529275	4.67226e-05	0.336007	0.170885	0.298654	0.235422	-3.81304	-7.95234	-4.3479	-5.64173	9875	5447	1131	3496	4987.25	microglia
GPR65	14744	0.0301751	0.297342	0.000607608	0.000184913	3.19362	2.33174	2.36607	2.43843	8.14903	4.03411	4.15536	4.42051	6211	8305	1186	4368	5017.5	monocyte
ABCA7	27403	0.0213054	0.516167	0.000322817	1.15446e-05	3.86745	2.06463	2.23257	2.42002	13.5955	3.18325	3.6997	4.35179	4496	9799	1363	4437	5023.75	monocyte
HDAC11	232232	0.0464078	0.00820665	0.000371787	0.0590878	0.0253451	0.024418	0.576427	0.612436	-56.4236	-58.5848	-2.03603	-1.89094	1821	1396	3401	13536	5038.5	microglia
PSAT1	107272	0.0468789	0.354204	0.00304697	0.000532923	2.84656	2.18736	2.9073	2.96907	6.19286	3.5547	6.50213	6.83032	7327	9071	730	3044	5043	monocyte
ARMCX2	67416	0.472161	0.0112451	0.00283589	0.000827426	0.282809	0.107542	0.506832	0.323213	-4.61762	-12.9214	-2.37571	-3.98226	8749	4026	2570	4842	5046.75	microglia
CHD7	320790	0.0230559	0.000517153	0.00113412	0.00273517	0.343344	0.175994	0.327371	0.223838	-3.72171	-7.70757	-3.9258	-5.9582	10043	5558	1267	3322	5047.5	microglia
IL1RN	16181	0.00979764	0.0335346	0.0047839	0.00186261	4.20973	3.07666	1.90341	1.80324	17.5035	7.43657	2.74095	2.49003	3889	5682	2035	8618	5056	monocyte
UHRF1BP1L	75089	0.0114267	0.376745	0.000548149	3.64455e-05	3.11797	2.22652	2.39062	2.6385	7.68164	3.68005	4.24382	5.22684	6450	8859	1167	3772	5062	monocyte
MICAL3	194401	0.111643	0.00143946	0.00347129	0.0023114	0.26847	0.164288	0.518479	0.258788	-4.88927	-8.291	-2.31244	-5.08977	8447	5290	2702	3857	5074	microglia
GPI1	14751	0.0444065	0.125862	0.000354294	0.000362468	3.41386	2.34305	2.29075	2.2084	9.65799	4.07374	3.89311	3.62161	5544	8228	1279	5251	5075.5	monocyte
VAV2	22325	0.0304794	0.00413872	0.00426215	0.00120769	0.340358	0.164153	0.3598	0.243524	-3.7584	-8.2982	-3.53047	-5.43829	9981	5287	1438	3602	5077	microglia
SRGAP2	14270	0.0602775	0.0133576	0.000637554	0.000818405	0.304925	0.156985	0.244861	0.335816	-4.24891	-8.69906	-5.40604	-3.81546	9223	5149	901	5054	5081.75	microglia
BBS7	71492	0.102123	0.0165652	0.00909789	0.0193903	0.201519	0.154646	0.543089	0.353438	-6.67072	-8.83797	-2.18776	-3.60227	7043	5108	2956	5279	5096.5	microglia
MRPL33	66845	0.00941298	0.0236164	0.00309673	0.00135808	3.23913	1.81294	3.39848	3.2937	8.44222	2.51359	9.54497	8.80621	6073	11484	514	2366	5109.25	monocyte
FAM49A	76820	0.00576189	0.382165	0.00139937	0.00420209	3.14714	2.3969	2.2249	2.32487	7.85898	4.2667	3.67479	4.01021	6359	7984	1369	4797	5127.25	monocyte
GLUL	14645	0.0569043	0.0121315	0.000538596	0.000413084	0.252135	0.136603	0.306517	0.401215	-5.23647	-10.0691	-4.22443	-3.11895	8077	4715	1168	6560	5130	microglia
5033414D02RIK	67759	0.494862	0.000199432	0.0167864	0.0102736	0.0984262	0.0605109	0.570685	0.535798	-14.1633	-23.3454	-2.06088	-2.22349	4378	2657	3321	10265	5155.25	microglia
ABCA9	217262	0.0680284	6.79346e-05	0.00064897	3.01435e-05	0.323538	0.16912	0.296063	0.302424	-3.97779	-8.04036	-4.39002	-4.28788	9606	5405	1119	4527	5164.25	microglia
UBE2T	67196	0.0441681	0.774176	0.00489327	0.00275583	4.68355	1.75913	2.94037	2.29997	24.6973	2.38493	6.67609	3.92449	3146	11902	717	4898	5165.75	monocyte
ITGAV	16410	0.0349558	0.0128527	0.000483817	0.000620312	0.325215	0.184212	0.316526	0.282545	-3.9549	-7.34236	-4.07617	-4.62238	9640	5728	1210	4161	5184.75	microglia
TBXAS1	21391	0.0447033	0.20544	0.000306097	0.000102565	0.347123	0.221935	0.281343	0.217552	-3.67618	-6.01335	-4.64413	-6.14404	10132	6450	1054	3245	5220.25	microglia
TLR7	170743	0.0659226	8.35838e-05	0.0115733	0.00191771	0.331747	0.192413	0.256693	0.288667	-3.86792	-7.00901	-5.13513	-4.51445	9767	5885	949	4294	5223.75	microglia
9130019P16RIK	100042056	0.0262858	0.020968	0.185037	0.000198175	0.123187	0.070409	0.777677	0.310195	-11.2185	-19.9943	-1.39984	-4.16884	5051	2952	8278	4651	5233	microglia
TRIM36	28105	0.0489747	0.111935	0.0049646	0.00258719	0.347278	0.16309	0.416303	0.2578	-3.67434	-8.35542	-2.98951	-5.11105	10134	5266	1802	3851	5263.25	microglia
TULP4	68842	0.00927179	0.0134133	0.00296258	0.00615058	0.294806	0.319726	0.338143	0.162196	-4.41072	-4.03074	-3.78603	-8.40417	8985	8313	1324	2441	5265.75	microglia
ZFP715	69930	0.0922338	0.00596696	0.00247852	0.00148374	0.382517	0.215821	0.269842	0.190619	-3.29366	-6.19713	-4.86202	-7.0795	10857	6342	1004	2919	5280.5	microglia
PRKAB2	108097	0.0407134	0.106995	0.00305961	0.00221301	3.00449	2.5837	1.98227	2.19379	7.02495	4.99475	2.95115	3.57505	6827	7242	1826	5305	5300	monocyte
PRKCQ	18761	0.195122	0.027738	0.0119629	0.00917953	0.263892	0.0494631	0.563789	0.440733	-4.98222	-28.67	-2.09141	-2.79881	8345	2298	3221	7352	5304	microglia
H2AFY	26914	0.0851716	0.0471785	0.00172987	0.00412103	2.92192	2.15464	2.55363	2.56232	6.57852	3.45256	4.87108	4.90658	7090	9251	1001	3979	5330.25	monocyte
DNMT3A	13435	0.0254542	0.0023869	0.00279947	0.00131177	0.322665	0.163154	0.418245	0.311144	-3.98981	-8.35194	-2.97353	-4.1547	9586	5268	1812	4665	5332.75	microglia
FIS1	66437	0.0318449	0.137518	0.00612013	0.002571	3.30944	2.45027	2.06011	2.12428	8.91381	4.46517	3.17018	3.35985	5845	7782	1645	6073	5336.25	monocyte
MANEA	242362	0.0477364	0.137018	0.000825611	0.000363182	0.295843	0.180573	0.444747	0.314083	-4.39364	-7.49997	-2.7695	-4.11148	9006	5656	2008	4696	5341.5	microglia
BCL2L1	12048	0.617146	0.000316592	0.0191304	0.0149329	0.447316	0.129542	0.316843	0.228257	-2.75102	-10.6444	-4.07162	-5.83366	12207	4558	1211	3395	5342.75	microglia
LOXL3	16950	0.0353249	0.0718362	0.000327856	0.000647874	0.334749	0.223154	0.475352	0.18618	-3.8291	-5.9779	-2.56241	-7.25966	9840	6469	2268	2821	5349.5	microglia
CDK2AP2	52004	0.00186531	0.524029	0.00415591	0.00119214	3.14253	2.45171	2.02964	2.13016	7.83074	4.47064	3.08304	3.37766	6379	7775	1721	5639	5378.5	monocyte
TSEN2	381802	0.102653	0.0121316	0.000990499	0.000640682	0.293455	0.141788	0.520967	0.33253	-4.43319	-9.68321	-2.29929	-3.85773	8966	4834	2722	5003	5381.25	microglia
PDXK	216134	0.0320535	0.452812	0.00451104	0.00490018	3.16304	2.33446	1.78885	2.41178	7.95715	4.04363	2.45539	4.32129	6306	8282	2443	4500	5382.75	monocyte
DTX4	207521	0.0367823	0.0940085	0.00133256	0.000155043	0.441146	0.210889	0.232101	0.160632	-2.79578	-6.3532	-5.7292	-8.49061	12058	6251	846	2419	5393.5	microglia
ECE1	230857	0.00524053	0.313459	0.00054844	0.000330979	3.08206	2.27161	2.1023	2.29824	7.46826	3.82863	3.29395	3.91858	6545	8623	1573	4908	5412.25	monocyte
APAF1	11783	0.0249383	0.410753	0.00035352	1.90747e-05	3.02245	2.18661	2.29563	2.37901	7.12546	3.55234	3.90968	4.2018	6763	9074	1272	4609	5429.5	monocyte
PVRL4	71740	0.0571507	0.00453125	0.00310956	0.000396266	0.249251	0.121388	0.531955	0.403789	-5.30252	-11.392	-2.24272	-3.09619	8029	4388	2840	6616	5468.25	microglia
SREBF2	20788	0.0350888	0.500412	0.00111754	0.00331622	3.10514	2.1957	1.94331	2.41778	7.60477	3.58111	2.84588	4.34348	6482	9027	1932	4438	5469.75	monocyte
ELMO2	140579	0.0281317	0.0466605	0.00119823	0.000709534	2.91216	2.42387	1.9965	2.24918	6.52744	4.3661	2.99032	3.75411	7120	7884	1801	5113	5479.5	monocyte
SLC6A8	102857	0.232799	0.00213593	0.00283432	0.00463765	0.187687	0.104004	0.575213	0.461962	-7.19754	-13.3775	-2.04124	-2.64961	6706	3939	3382	7904	5482.75	microglia
GNA15	14676	0.0613269	0.0214411	0.00274018	0.0010329	0.422753	0.185083	0.292647	0.229075	-2.937	-7.30554	-4.4467	-5.81114	11692	5744	1099	3404	5484.75	microglia
BAK1	12018	0.041284	0.276821	0.00156364	0.00151872	3.08096	2.32522	2.01045	2.19867	7.46176	4.01143	3.02909	3.59056	6548	8346	1769	5294	5489.25	monocyte
TMEM71	213068	0.0304794	0.55245	0.000660703	0.00518728	3.02544	2.08306	2.15429	2.51999	7.14233	3.23704	3.4515	4.73579	6757	9666	1480	4074	5494.25	monocyte
SESN1	140742	0.00487097	0.0247743	0.00125785	0.000516311	0.410539	0.212858	0.269637	0.226544	-3.03783	-6.29003	-4.86607	-5.88134	11459	6286	1003	3371	5529.75	microglia
GPX1	14775	0.0401066	0.160017	0.000893195	0.000187541	3.79181	2.65707	1.93406	1.80625	12.8499	5.30749	2.82128	2.49732	4656	6958	1955	8587	5539	monocyte
HAT1	107435	0.0237182	0.137471	0.00433057	0.000615626	2.94368	2.26396	2.17134	2.2511	6.69373	3.80308	3.50443	3.76046	7028	8651	1455	5103	5559.25	monocyte
MKNK2	17347	0.0346965	0.355515	0.000550032	0.000665042	3.20503	2.84573	1.86634	1.90015	8.22166	6.1887	2.64605	2.73252	6186	6347	2162	7555	5562.5	monocyte
TEAD3	21678	0.76613	0.00780587	0.00739762	0.0216019	0.13429	0.0444142	0.574471	0.571645	-10.2509	-31.9853	-2.04444	-2.05669	5306	2140	3375	11504	5581.25	microglia
ARHGDIB	11857	0.0351845	0.0241945	0.00150402	0.000815183	3.84098	2.82546	1.81396	1.7546	13.3301	6.08839	2.51606	2.37432	4556	6407	2352	9229	5636	monocyte
ARID3B	56380	0.737947	0.0346476	0.000943982	0.0010313	0.252641	0.222317	0.495734	0.373993	-5.22503	-6.0022	-2.4388	-3.37912	8083	6461	2473	5631	5662	microglia
PLD3	18807	0.130562	0.0406013	0.00174709	0.000430818	0.445804	0.214688	0.243313	0.220091	-2.76187	-6.23235	-5.44342	-6.0677	12178	6320	894	3281	5668.25	microglia
ZFP318	57908	0.188522	0.00487182	0.00233541	0.00927031	0.314328	0.204093	0.483113	0.322803	-4.10792	-6.58058	-2.5141	-3.98791	9406	6123	2359	4834	5680.5	microglia
CTSO	229445	0.0176802	0.0958417	0.00881395	0.0118278	0.358798	0.211266	0.378092	0.310595	-3.54162	-6.341	-3.33754	-4.16288	10355	6254	1542	4655	5701.5	microglia
CCDC93	70829	0.047954	0.00748584	0.00867258	0.00471819	0.375565	0.211979	0.394827	0.288498	-3.36307	-6.31809	-3.17677	-4.51737	10693	6273	1640	4287	5723.25	microglia
PLD2	18806	0.270692	0.00381214	0.00270039	0.00208688	0.432716	0.105954	0.477265	0.316965	-2.859	-13.1223	-2.55035	-4.06989	11897	3986	2294	4721	5724.5	microglia
CAST	12380	0.110636	0.0163572	0.000518048	4.4192e-05	2.35235	2.36082	2.49404	2.4213	4.10655	4.13664	4.63354	4.35655	9410	8144	1060	4431	5761.25	monocyte
NAPB	17957	0.152682	0.000226404	0.00825743	0.0366004	0.255871	0.0475578	0.553111	0.520028	-5.15315	-29.8384	-2.1402	-2.30424	8155	2237	3095	9691	5794.5	microglia
TMEM135	72759	0.00547107	0.0193526	0.000466428	0.000289133	0.38625	0.21285	0.363699	0.308426	-3.25742	-6.29027	-3.48772	-4.1954	10921	6285	1462	4615	5820.75	microglia
AHCYL2	74340	0.0129793	0.00427738	0.00120496	0.00177485	2.93675	2.75377	1.68808	2.01354	6.65685	5.74478	2.22228	3.03771	7049	6638	2879	6760	5831.5	monocyte
PKD2	18764	0.0830002	0.014161	0.00159281	0.000318264	0.399247	0.214276	0.415537	0.270461	-3.13657	-6.24524	-2.99585	-4.84982	11210	6316	1799	4021	5836.5	microglia
FAM129A	63913	0.00186531	0.239853	0.00255172	0.00133936	2.94258	2.29928	2.02537	2.09051	6.68785	3.92213	3.07095	3.25899	7030	8472	1733	6261	5874	monocyte
ATP6V1A	11964	0.0326965	0.0992243	0.000792743	0.000477234	3.00221	2.45803	1.93308	1.97595	7.01229	4.49467	2.8187	2.93388	6838	7745	1962	7015	5890	monocyte
NCOA7	211329	0.0110653	0.477185	0.000408368	0.000156311	2.70445	2.02438	2.15402	2.48032	5.51811	3.06816	3.45066	4.58021	7869	10040	1481	4180	5892.5	monocyte
CTDSP1	227292	0.0360351	0.326276	0.00230537	0.00256351	3.03704	1.95154	2.12635	2.31606	7.20804	2.86786	3.36611	3.9797	6700	10505	1528	4846	5894.75	monocyte
GKAP1	56278	0.047954	0.371534	0.00492664	0.000833376	0.333267	0.201889	0.514216	0.336684	-3.84818	-6.65765	-2.33526	-3.80443	9802	6075	2659	5066	5900.5	microglia
ACHE	11423	0.82503	0.0157006	0.0106096	0.00301946	0.460652	0.0564567	0.399298	0.416524	-2.65841	-25.0573	-3.13611	-2.98768	12507	2545	1678	6873	5900.75	microglia
DENND4A	102442	0.0174849	0.0163639	0.000639028	0.00118223	0.411892	0.24532	0.365668	0.253246	-3.02636	-5.39502	-3.46647	-5.21144	11482	6897	1473	3787	5909.75	microglia
KCNJ10	16513	0.82949	0.0167735	0.00208846	0.025325	0.459341	0.0533067	0.529762	0.377822	-2.66728	-26.5671	-2.25382	-3.34025	12471	2429	2819	6098	5954.25	microglia
SLC9A9	331004	0.0196158	0.120189	4.96e-05	2.51322e-05	0.405193	0.215289	0.369921	0.319864	-3.08389	-6.21362	-3.42135	-4.0288	11344	6328	1499	4771	5985.5	microglia
GINS1	69270	0.0232859	0.626243	0.00592933	0.00582135	3.20809	1.74837	2.1994	2.42892	8.24125	2.3598	3.59288	4.38491	6170	11981	1407	4386	5986	monocyte
PGAP1	241062	0.0266808	0.549532	0.00500795	0.0118678	2.93095	1.97285	2.37537	2.18478	6.62612	2.92544	4.18869	3.54657	7064	10367	1179	5361	5992.75	monocyte
FBRSL1	381668	0.0175082	0.0700786	0.00310004	0.000681042	0.334297	0.152263	0.51754	0.399264	-3.83491	-8.98384	-2.31743	-3.13642	9830	5044	2690	6534	6024.5	microglia
TTC3	22129	0.160778	0.00060638	0.00248226	0.0010353	0.326873	0.265027	0.464577	0.333423	-3.93249	-4.95888	-2.63218	-3.84617	9674	7275	2175	5014	6034.5	microglia
LYST	17101	0.0214471	0.492118	0.000655057	0.00118041	3.03082	2.06729	2.13577	2.09123	7.17272	3.191	3.39471	3.2611	6735	9780	1512	6257	6071	monocyte
PITPNA	18738	0.0257483	0.0260331	0.000580822	0.000239475	2.8205	2.29759	1.99369	2.03735	6.06407	3.91637	2.98254	3.10491	7424	8479	1808	6601	6078	monocyte
PRKX	19108	0.0114267	0.490329	0.00483348	0.0026974	3.04221	1.94182	1.97644	2.21229	7.23752	2.8419	2.93521	3.6341	6681	10568	1847	5216	6078	monocyte
AKR1B10	67861	0.0517172	0.00791329	0.00247043	0.00215067	0.391526	0.213708	0.369992	0.370554	-3.20739	-6.26311	-3.4206	-3.41473	11032	6303	1500	5576	6102.75	microglia
SLC29A3	71279	0.113274	0.0259917	0.00266535	0.00100356	0.403114	0.234368	0.358125	0.333671	-3.10213	-5.66921	-3.54913	-3.84296	11298	6695	1430	5024	6111.75	microglia
CHN2	69993	0.578455	0.00561586	0.00100038	0.000198175	0.423978	0.232512	0.368418	0.310195	-2.92722	-5.71825	-3.43718	-4.16884	11718	6657	1495	4646	6129	microglia
LPCAT3	14792	0.336547	0.0126866	0.00274018	0.00113532	0.365593	0.261162	0.385778	0.3533	-3.46727	-5.03922	-3.26196	-3.60388	10508	7199	1589	5277	6143.25	microglia
ARHGAP39	223666	0.614711	0.0412596	0.00563015	0.00402855	0.321039	0.229162	0.458628	0.389278	-4.01236	-5.80875	-2.67213	-3.22853	9567	6582	2124	6312	6146.25	microglia
1500032L24RIK	69029	0.0418853	0.757977	0.00109934	0.00146665	3.2211	1.73071	2.25228	2.25362	8.32498	2.31891	3.76434	3.76878	6128	12121	1334	5098	6170.25	monocyte
UBE2L6	56791	0.0453654	0.397947	0.00384141	0.00611119	2.03127	2.62461	1.81345	2.53986	3.08765	5.16717	2.51482	4.81531	11336	7081	2356	4029	6200.5	monocyte
MAN1A2	17156	0.0110653	0.00517002	0.000792743	0.000236548	0.404078	0.246168	0.380877	0.333737	-3.09365	-5.37481	-3.3098	-3.84211	11319	6907	1565	5027	6204.5	microglia
LOC100504473	100504473	0.150248	4.27839e-05	0.00116413	0.00288076	0.284659	0.112923	0.516825	0.507188	-4.58459	-12.2824	-2.32125	-2.37374	8787	4150	2682	9232	6212.75	microglia
MSI2	76626	0.150248	4.27839e-05	0.00116413	0.00288076	0.284659	0.112923	0.516825	0.507188	-4.58459	-12.2824	-2.32125	-2.37374	8787	4150	2682	9232	6212.75	microglia
ITPR2	16439	0.21016	0.00205625	0.00572617	0.00347684	0.466203	0.207241	0.378546	0.302827	-2.62145	-6.4734	-3.33299	-4.28158	12630	6189	1547	4531	6224.25	microglia
FEZ2	225020	0.048049	0.20082	0.000330404	1.08824e-05	0.424501	0.244466	0.409143	0.305272	-2.92305	-5.41553	-3.04974	-4.24354	11725	6883	1751	4583	6235.5	microglia
SERP1	28146	0.00666898	0.492842	0.00223947	0.000698348	2.95612	2.01472	2.2758	2.03839	6.76034	3.04101	3.84265	3.10788	6988	10090	1302	6595	6243.75	monocyte
NF1	18015	0.598275	0.000270843	0.000409355	1.87046e-05	0.451034	0.269425	0.330909	0.276417	-2.72465	-4.87027	-3.87889	-4.73523	12300	7348	1283	4075	6251.5	microglia
ESD	13885	0.0315507	0.527948	0.000941395	0.00221496	3.21236	2.16237	1.8594	1.90457	8.26862	3.47648	2.62857	2.74396	6156	9200	2180	7529	6266.25	monocyte
SLC23A2	54338	0.0125589	0.0858436	0.00704436	0.0029934	0.424412	0.232208	0.431679	0.32131	-2.92376	-5.72636	-2.86695	-4.00858	11724	6647	1910	4799	6270	microglia
DNAJC16	214063	0.168165	0.0407904	0.0088361	0.02261	0.357579	0.19519	0.493111	0.392495	-3.55525	-6.9025	-2.45413	-3.19834	10339	5942	2445	6368	6273.5	microglia
GLA	11605	0.0454347	0.603108	0.00754027	0.00223836	2.54285	1.78373	2.24903	2.71426	4.82737	2.44315	3.75363	5.56255	8515	11715	1335	3541	6276.5	monocyte
BBS12	241950	0.789522	0.0105047	0.00317	0.00859313	0.26829	0.0883105	0.450621	0.563574	-4.89286	-15.8417	-2.72756	-2.09237	8443	3523	2055	11163	6296	microglia
NDUFB3	66495	0.0100827	0.477422	0.00664128	0.00318526	2.7771	2.0332	1.77291	2.24031	5.85475	3.09312	2.41743	3.725	7583	9983	2501	5141	6302	monocyte
SPOP	20747	0.0835721	0.0410227	0.0045959	0.00596057	3.00581	2.44415	1.81481	1.81892	7.03228	4.44206	2.51812	2.52816	6824	7805	2347	8421	6349.25	monocyte
ANGPTL3	30924	0.111593	0.0148672	0.00388631	0.00740889	0.238849	0.13724	0.54595	0.526822	-5.55399	-10.0201	-2.174	-2.26885	7838	4733	2997	9899	6366.75	microglia
CORO1A	12721	0.0383309	0.0314136	0.00159863	0.000948698	3.0595	2.32794	1.81523	1.82659	7.33681	4.02088	2.51916	2.54698	6629	8331	2342	8345	6411.75	monocyte
NDUFB11	104130	0.0320496	0.756609	0.00372345	0.0440921	2.60897	1.68484	2.12873	2.75364	5.10069	2.21505	3.37333	5.74415	8226	12517	1524	3458	6431.25	monocyte
SLC16A10	72472	0.0477092	0.542115	0.00142021	0.00291781	2.94889	1.84817	1.91802	2.14799	6.72155	2.60043	2.77905	3.4321	7011	11209	1996	5542	6439.5	monocyte
MRPL30	107734	0.0478259	0.535065	0.00118149	0.00249129	2.69609	2.08974	2.01104	2.05469	5.48045	3.25671	3.03071	3.15455	7898	9622	1765	6491	6444	monocyte
MEF2A	17258	0.0713025	0.00348091	0.000573647	0.000299804	0.385474	0.222892	0.423735	0.40426	-3.26489	-5.98548	-2.92915	-3.09205	10908	6467	1852	6627	6463.5	microglia
TMEM87B	72477	0.0550402	0.00914109	9.30512e-05	0.000697905	0.411144	0.258163	0.458682	0.343624	-3.03269	-5.10322	-2.67176	-3.7183	11472	7146	2126	5142	6471.5	microglia
GRAMD4	223752	0.0272549	0.207856	0.000544773	0.000496345	2.66944	1.99408	1.75651	2.24785	5.36182	2.98362	2.37879	3.74975	7987	10220	2564	5121	6473	monocyte
ZCCHC24	71918	0.0306143	0.75292	0.00345681	0.000138407	2.55146	1.67187	1.76246	3.37233	4.86226	2.18628	2.39277	9.35556	8472	12627	2541	2269	6477.25	monocyte
TRIM25	217069	0.0416061	0.458404	0.000940308	0.00245404	3.0608	2.10121	1.89685	1.8866	7.34437	3.29068	2.72398	2.69764	6621	9554	2058	7691	6481	monocyte
DDHD1	114874	0.0722923	0.0455872	0.000529089	0.00118223	2.82609	2.19185	1.88544	1.92141	6.0915	3.56892	2.69466	2.78792	7406	9051	2093	7403	6488.25	monocyte
RASSF4	213391	0.0174849	0.471289	0.000808199	0.000360988	2.61525	1.99787	2.09632	2.11965	5.12729	2.9941	3.27616	3.34589	8187	10200	1584	6086	6514.25	monocyte
SEPP1	20363	0.0191271	0.056869	0.00425597	0.00133936	0.34426	0.18599	0.396011	0.489027	-3.71058	-7.26758	-3.16592	-2.47833	10079	5765	1651	8685	6545	microglia
MBD2	17191	0.0292508	0.456615	0.000438685	0.000391544	2.89852	1.95803	1.96527	2.01453	6.4566	2.88532	2.90487	3.0405	7151	10462	1868	6753	6558.5	monocyte
ATP6V1B2	11966	0.00968092	0.399839	0.000655066	0.000340547	2.99005	1.82276	2.03547	2.08781	6.94499	2.53758	3.09957	3.25102	6866	11405	1705	6280	6564	monocyte
E2F6	50496	0.0257483	0.388954	0.00311723	0.00686925	3.17979	2.28404	1.86325	1.74862	8.06176	3.87038	2.63826	2.36037	6253	8562	2171	9304	6572.5	monocyte
EEF1B2	55949	0.144482	0.0456231	0.00167995	0.0021249	3.05695	2.06438	1.81091	1.90417	7.32213	3.18255	2.50863	2.74294	6640	9803	2367	7540	6587.5	monocyte
DDX26B	236790	0.0332486	0.0979793	0.00199392	0.000627316	0.413197	0.240475	0.404557	0.392101	-3.01538	-5.51324	-3.08945	-3.20202	11515	6801	1715	6360	6597.75	microglia
AGTPBP1	67269	0.00298525	0.483139	0.000893195	0.000234373	2.61367	1.96367	2.01977	2.10494	5.12059	2.90052	3.05518	3.3018	8198	10427	1740	6189	6638.5	monocyte
ANXA3	11745	0.649336	0.0465023	0.000624921	0.000332309	0.488754	0.220805	0.382267	0.370486	-2.47996	-6.04654	-3.29611	-3.41544	13056	6426	1572	5574	6657	microglia
ATP8A1	11980	0.0137723	0.00233746	0.000600298	0.000456078	0.452991	0.254133	0.418418	0.362575	-2.71094	-5.1916	-2.97211	-3.49994	12337	7056	1814	5446	6663.25	microglia
GPRASP1	67298	0.059041	0.00390556	0.00289293	0.00420209	0.370028	0.299924	0.341551	0.413898	-3.42023	-4.32751	-3.74367	-3.0095	10589	7922	1342	6836	6672.25	microglia
NDUFS6	407785	0.0464078	0.574486	0.00623546	0.0105265	2.4725	1.79295	2.03251	2.39595	4.55006	2.46523	3.09116	4.26323	8836	11628	1711	4559	6683.5	monocyte
ALDH9A1	56752	0.028516	0.540003	0.00459406	0.0039146	2.46313	1.86424	2.05107	2.22331	4.51413	2.64075	3.14414	3.66965	8877	11086	1671	5179	6703.25	monocyte
DIP2B	239667	0.221011	0.040624	0.00261175	0.00109524	0.490937	0.264398	0.403005	0.321463	-2.46696	-4.97179	-3.10309	-4.00645	13107	7264	1704	4802	6719.25	microglia
MYH9	17886	0.302818	0.0265699	0.00160684	0.0010313	2.56823	2.00538	2.0717	2.02308	4.93083	3.01493	3.20382	3.06452	8405	10160	1626	6687	6719.5	monocyte
STK24	223255	0.0359066	0.552278	0.000544101	0.000265214	2.85522	1.92854	1.93843	1.97659	6.23614	2.80671	2.83289	2.93561	7297	10642	1943	7013	6723.75	monocyte
IFI30	65972	0.00212367	0.382535	0.00121623	0.00106284	3.05539	2.20236	1.80006	1.7762	7.31315	3.60232	2.48234	2.42523	6645	8982	2412	8949	6747	monocyte
ENDOD1	71946	0.0486257	0.315554	0.00344243	0.00119967	0.44996	0.237854	0.56351	0.32325	-2.73222	-5.57919	-2.09266	-3.98174	12261	6766	3215	4845	6771.75	microglia
EIF4E3	66892	0.0304794	0.0552488	0.00420277	0.00303458	2.9373	1.75458	1.97784	2.08886	6.65974	2.37429	2.93904	3.25412	7047	11939	1842	6267	6773.75	monocyte
HERC2	15204	0.0223964	0.0666183	0.00184348	0.000236548	0.449755	0.262847	0.465368	0.364411	-2.73368	-5.0039	-2.62695	-3.48001	12258	7230	2183	5468	6784.75	microglia
CORO2A	107684	0.0105776	0.374753	0.00235763	0.00184993	2.72193	1.96189	1.85329	2.02027	5.59757	2.89573	2.61324	3.05661	7792	10437	2205	6713	6786.75	monocyte
TLR1	21897	0.0205743	0.226512	0.0014897	0.00162344	0.480469	0.247729	0.405987	0.374096	-2.53039	-5.338	-3.07697	-3.37807	12896	6931	1727	5638	6798	microglia
ATP11B	76295	0.0128572	0.0733761	0.0024828	0.00151261	2.62614	1.91367	2.07183	2.0211	5.17374	2.76766	3.2042	3.05894	8134	10749	1625	6709	6804.25	monocyte
SIPA1L1	217692	0.261296	0.0247498	0.0027266	0.0012543	0.503365	0.287284	0.440235	0.285006	-2.39512	-4.53842	-2.80249	-4.57844	13373	7706	1982	4185	6811.5	microglia
RFTN1	76438	0.0281321	0.308531	0.000844275	0.00139381	3.09805	2.29419	1.63429	1.76077	7.5626	3.90479	2.10434	2.38879	6495	8500	3179	9144	6829.5	monocyte
IGSF6	80719	0.0390213	0.414544	0.00088227	0.000498624	2.87926	2.12241	1.74235	1.81438	6.35773	3.3542	2.34579	2.51708	7210	9451	2634	8473	6942	monocyte
LRRC8A	241296	0.595175	0.0367863	0.00447364	0.000602071	0.493949	0.3968	0.576029	0.0723134	-2.44921	-3.15871	-2.03774	-19.4548	13165	9853	3393	1375	6946.5	microglia
PABPC1	18458	0.037698	0.230615	0.000873076	0.001075	2.85009	2.21874	1.70125	1.77832	6.21047	3.65487	2.25183	2.43027	7308	8896	2823	8913	6985	monocyte
ATP6V0A1	11975	0.53722	0.0142615	0.000330079	0.000185671	0.536724	0.299002	0.384895	0.304826	-2.2189	-4.3423	-3.27049	-4.25043	14042	7909	1586	4568	7026.25	microglia
COX6B1	110323	0.0421195	0.511888	0.00716992	0.00291212	2.93043	1.96821	1.77179	1.83843	6.62337	2.91281	2.41476	2.5762	7065	10395	2507	8194	7040.25	monocyte
CXCL10	15945	0.0437198	1.19592	0.00704436	0.0198353	3.39613	1.23075	2.08863	2.84763	9.52782	1.3469	3.25344	6.19817	5589	17809	1593	3222	7053.25	monocyte
GLUD1	14661	0.0360351	0.528166	0.000956582	0.00138021	2.58035	1.78926	1.89472	2.10478	4.98086	2.45638	2.71851	3.30133	8348	11660	2062	6194	7066	monocyte
MS4A6B	69774	0.0398263	0.531286	0.00321689	0.00279824	2.7054	2.03619	1.80662	1.84402	5.52239	3.10161	2.49823	2.59009	7866	9964	2386	8146	7090.5	monocyte
STK38	106504	0.00210429	0.0346501	0.0010185	0.000193064	2.43607	1.79029	2.08257	2.1057	4.41167	2.45884	3.23562	3.30408	8983	11646	1605	6185	7104.75	monocyte
PITPNC1	71795	0.0328758	0.164738	0.00314913	0.000438806	0.455929	0.347391	0.479671	0.32941	-2.69059	-3.67298	-2.53533	-3.89865	12397	8872	2314	4943	7131.5	microglia
ABHD5	67469	0.0350262	0.393174	0.00126909	0.0025842	2.7143	1.88222	1.77562	1.93325	5.56275	2.68641	2.42385	2.81914	7830	10972	2493	7264	7139.75	monocyte
FAM164A	67306	0.0468131	0.526006	0.00275659	0.00409809	2.68875	2.01699	1.71308	1.86546	5.44754	3.04738	2.27859	2.64385	7926	10078	2766	7919	7172.25	monocyte
0610037L13RIK	74098	0.012454	0.0117565	0.000976652	0.000311009	0.31441	0.197616	0.549584	0.535856	-4.10673	-6.81189	-2.15673	-2.2232	9409	5995	3044	10267	7178.75	microglia
PNPLA7	241274	0.134145	0.00535633	0.000941963	0.000457073	0.427573	0.276719	0.507345	0.421555	-2.89881	-4.72955	-2.37286	-2.94664	11785	7488	2577	6974	7206	microglia
JMJD1C	108829	0.0291301	0.654443	0.00393237	0.00352844	0.515644	0.253518	0.435892	0.392778	-2.32757	-5.20534	-2.83489	-3.19572	13608	7044	1939	6373	7241	microglia
CC2D2A	231214	0.82503	0.0408829	0.00198983	0.010004	0.268638	0.159056	0.57434	0.582252	-4.88591	-8.57952	-2.04501	-2.01133	8452	5196	3373	11953	7243.5	microglia
9130401M01RIK	75758	0.0304794	0.536661	0.000893195	0.00191473	2.67423	1.85729	1.78437	1.91971	5.383	2.62326	2.44468	2.78346	7973	11139	2465	7423	7250	monocyte
UXS1	67883	0.0304794	0.212936	0.00256835	0.000147914	2.75379	1.99908	1.74687	1.80403	5.74487	2.99744	2.35628	2.49195	7664	10194	2611	8602	7267.75	monocyte
PRKAB1	19079	0.126973	0.00364438	0.00606911	0.00489994	0.445331	0.255683	0.513591	0.435408	-2.76528	-5.15728	-2.33864	-2.83855	12166	7089	2651	7215	7280.25	microglia
CD48	12506	0.0381871	0.590111	0.00056328	0.00067824	2.96816	1.82624	1.81098	1.81696	6.82537	2.5461	2.50881	2.52337	6944	11378	2366	8454	7285.5	monocyte
CALM1	12313	0.0144436	0.180782	0.000898232	0.000193808	2.90263	2.30658	1.61825	1.68744	6.47787	3.94708	2.07002	2.22084	7140	8441	3288	10285	7288.5	monocyte
IFI47	15953	0.0143562	1	0.000239423	0.000787165	6.50506	0	4.70824	4.08831	89.8279	0	25.1409	16.01	1305	26100	168	1591	7291	monocyte
MAN2A1	17158	0.0301885	0.743054	0.000188962	0.000139426	2.3512	1.58821	2.13108	2.30956	4.10249	2.00676	3.38044	3.95732	9414	13443	1519	4874	7312.5	monocyte
LPCAT1	210992	0.374769	0.014509	0.00448757	0.00299216	0.457545	0.295767	0.474392	0.409408	-2.67951	-4.39488	-2.5685	-3.04747	12428	7858	2254	6747	7321.75	microglia
CDK14	18647	0.0955761	0.0112251	0.00167995	0.00276415	0.446261	0.272454	0.561397	0.398339	-2.75859	-4.81091	-2.10218	-3.14475	12188	7410	3187	6509	7323.5	microglia
HIPK1	15257	0.00941298	0.234239	0.00135018	0.00147885	2.55847	1.99421	1.78694	1.83295	4.89083	2.98397	2.45082	2.56266	8444	10217	2450	8244	7338.75	monocyte
NDUFS4	17993	0.0472813	0.612065	0.00130534	0.00246124	2.9399	1.84433	1.85417	1.78064	6.67357	2.59086	2.61543	2.43578	7036	11250	2201	8888	7343.75	monocyte
KTN1	16709	0.0332486	0.0338914	0.00485633	0.0010313	0.476848	0.316335	0.481602	0.383792	-2.55298	-4.07892	-2.52338	-3.28119	12827	8219	2334	6229	7402.25	microglia
QK	19317	0.154536	0.0105188	0.00176497	0.000781448	0.417352	0.309009	0.388127	0.4779	-2.98086	-4.18661	-3.23946	-2.54638	11593	8074	1600	8347	7403.5	microglia
CUL4B	72584	0.0332486	0.389324	0.0046903	0.00110162	2.52386	1.75672	1.93653	1.94443	4.75119	2.37928	2.82785	2.84886	8588	11922	1950	7197	7414.25	monocyte
KDM2B	30841	0.0404458	0.0329536	0.00892632	0.00109561	0.528124	0.322437	0.685647	0.122935	-2.26217	-3.99296	-1.64359	-11.2426	13895	8367	5399	2011	7418	microglia
ERI1	67276	0.0291301	0.737797	0.000411424	0.00010937	2.45335	1.59281	1.98168	2.13987	4.47688	2.01636	2.94954	3.40723	8920	13387	1830	5581	7429.5	monocyte
SCARB1	20778	0.0438484	0.52337	0.000639028	0.000227423	2.05096	1.5672	2.42915	2.64048	3.14382	1.96328	4.38575	5.23539	11186	13678	1121	3763	7437	monocyte
ARPC1B	11867	0.0320535	0.502689	0.000982468	0.000839447	2.45405	1.8996	1.93327	1.85291	4.47952	2.73111	2.8192	2.61228	8916	10854	1961	8048	7444.75	monocyte
NCOA1	17977	0.0206678	0.528017	0.000519596	0.000164278	2.31251	1.82998	1.83582	2.01444	3.96745	2.55533	2.56974	3.04024	9626	11351	2251	6756	7496	monocyte
PSTPIP2	19201	0.00761326	7.08977e-09	4.64827e-05	0.0259264	6.68823	5.5383	3.55441	1.30921	102.124	45.4723	10.7486	1.47805	1200	1654	450	26726	7507.5	monocyte
IQCB1	320299	0.80537	0.0117219	0.00609319	0.00109524	0.51043	0.22913	0.535735	0.426375	-2.35585	-5.80964	-2.2238	-2.90822	13510	6580	2875	7087	7513	microglia
SPG21	27965	0.0346965	0.535767	0.00174709	0.00132334	2.77059	1.87056	1.73832	1.78464	5.82385	2.65674	2.33647	2.44533	7603	11042	2655	8849	7537.25	monocyte
CD164	53599	0.0291301	0.0746689	0.00340898	0.0017764	0.39635	0.196835	0.444341	0.561656	-3.16282	-6.84084	-2.77244	-2.10101	11124	5969	2003	11072	7542	microglia
PTPLAD2	66775	0.0346965	0.609785	0.00275659	0.00661016	2.83352	1.69627	1.72187	1.88243	6.12812	2.24061	2.29864	2.68695	7381	12410	2725	7750	7566.5	monocyte
ACACA	107476	0.0354053	0.673869	0.0013539	0.000309642	2.80022	1.56631	1.82421	1.99309	5.96547	1.96147	2.54112	2.98089	7490	13691	2303	6892	7594	monocyte
ARRB2	216869	0.386028	0.0116651	0.000314823	0.00013478	0.482403	0.334056	0.445307	0.418776	-2.51846	-3.838	-2.76545	-2.96919	12929	8608	2011	6912	7615	microglia
ZBTB20	56490	0.0447709	0.0260236	0.00292736	0.000819505	0.48449	0.296642	0.497536	0.440828	-2.50569	-4.38054	-2.42836	-2.79812	12976	7873	2488	7355	7673	microglia
TANC2	77097	0.0143562	1	0.000708862	0.000223164	0.00403899	0	0.0277806	0.00679814	-356.692	0	-51.4334	-211.719	500	30087	78	104	7692.25	microglia
TCF4	21413	0.143047	0.0163427	0.00197978	0.00249176	0.540215	0.310663	0.45768	0.394888	-2.20172	-4.16186	-2.67858	-3.1762	14098	8107	2118	6452	7693.75	microglia
KLHL25	207952	0.0168134	0.511466	0.00561007	0.00862588	0.580613	0.30427	0.54769	0.327351	-2.01822	-4.25907	-2.1657	-3.92607	14968	7994	3024	4897	7720.75	microglia
CS	12974	0.0460268	0.686084	0.0006493	0.00448069	2.62217	1.65199	1.82741	1.88817	5.15677	2.14267	2.549	2.70165	8152	12793	2298	7664	7726.75	monocyte
CSTB	13014	0.0248992	0.777691	0.00608974	0.00293744	2.40131	1.71796	1.82824	1.94327	4.28281	2.2897	2.55103	2.84576	9176	12231	2291	7211	7727.25	monocyte
PICALM	233489	0.356234	0.0285039	0.00572485	0.000241499	0.509259	0.298906	0.457061	0.443123	-2.36228	-4.34384	-2.68281	-2.7813	13487	7905	2112	7440	7736	microglia
SGK3	170755	0.0180441	0.385463	0.00238424	0.000662047	2.17585	1.81412	1.91161	1.96175	3.51853	2.51646	2.76229	2.89533	10409	11474	2015	7109	7751.75	monocyte
USP25	30940	0.00972329	0.559005	0.00111154	0.000757897	2.56826	1.76452	1.8601	1.80422	4.93095	2.39761	2.63033	2.4924	8404	11860	2178	8600	7760.5	monocyte
INPP5F	101490	0.0488423	0.565122	0.00141586	0.000156311	2.46627	1.53457	2.07591	2.02147	4.52614	1.89702	3.21612	3.05998	8864	14009	1618	6698	7797.25	monocyte
ANXA4	11746	0.0190027	0.435311	0.00408264	0.00199659	2.28026	1.64199	1.92376	2.04071	3.85764	2.12097	2.79411	3.11448	9786	12895	1987	6580	7812	monocyte
IPCEF1	320495	0.0462729	0.010371	0.00514619	0.0116438	0.489255	0.2613	0.537721	0.476784	-2.47697	-5.0363	-2.21397	-2.55338	13077	7202	2896	8265	7860	microglia
CXCL16	66102	0.0328307	1	0.00381304	0.00730001	0.10868	0	0.179227	0.072118	-12.781	0	-7.55991	-19.5088	4673	24831	640	1364	7877	microglia
REXO2	104444	0.0061484	0.545925	0.00218409	0.00096742	2.46834	1.78521	1.69081	1.83876	4.53406	2.44669	2.22837	2.57702	8853	11697	2862	8192	7901	monocyte
RABEPK	227746	0.00941298	0.00105145	0.318344	0.0429333	0.113816	0.0588936	0.874508	0.532792	-12.1822	-24.0001	-1.19993	-2.23851	4814	2609	14080	10146	7912.25	microglia
PID1	98496	0.0394588	0.706619	0.00213433	0.000580835	2.50365	1.63109	1.89773	1.86621	4.67118	2.09747	2.72627	2.64573	8671	13007	2056	7918	7913	monocyte
SELPLG	20345	0.0350616	0.00837182	0.001068	0.000190113	0.342008	0.187055	0.538119	0.604051	-3.73804	-7.2235	-2.21201	-1.92315	10013	5796	2905	13030	7936	microglia
PRKAG1	19082	0.0478243	0.754905	0.00823895	0.00459944	2.7438	1.71045	1.745	1.74144	5.69831	2.27263	2.35195	2.34369	7701	12295	2619	9417	8008	monocyte
NFATC2	18019	0.0474066	0.00516921	0.0034877	0.00223836	0.459879	0.251645	0.616082	0.484498	-2.66364	-5.24758	-1.8772	-2.50565	12490	7012	4011	8526	8009.75	microglia
GTDC1	227835	0.256016	0.00414122	0.00284491	0.00153984	0.565785	0.356046	0.483637	0.384227	-2.0825	-3.57254	-2.5109	-3.27696	14683	9043	2363	6239	8082	microglia
WDR44	72404	0.0914722	0.0408688	0.00244783	0.000635654	0.553167	0.309383	0.526143	0.43872	-2.13994	-4.18099	-2.27234	-2.81373	14430	8084	2777	7298	8147.25	microglia
ITPRIP	414801	0.0315343	1	0.000368324	0.000210091	4.96007	0	2.35574	2.79612	30.1266	0	4.11856	5.94571	2805	25552	1198	3332	8221.75	monocyte
SUPT16H	114741	0.0454718	0.787087	0.00296996	0.000619187	2.65638	1.61566	1.78044	1.75508	5.3045	2.06452	2.43531	2.37546	8026	13170	2479	9214	8222.25	monocyte
SMC1A	24061	0.0257483	0.545286	0.00189629	0.00149827	2.37537	1.61404	1.82336	1.82767	4.1887	2.06108	2.53903	2.54964	9309	13182	2308	8321	8280	monocyte
PDCD6	18570	0.0441681	0.833849	0.000709153	0.000926897	2.68998	1.58208	1.8066	1.74248	5.45303	1.994	2.49816	2.34609	7922	13513	2387	9398	8305	monocyte
SLC25A12	78830	0.00836438	0.588339	0.00027534	0.000203938	2.36119	1.50311	1.81646	1.94598	4.13792	1.83454	2.52217	2.853	9370	14379	2337	7183	8317.25	monocyte
NOTCH2	18129	0.0123258	0.398409	0.00434582	0.00271573	2.53623	1.83432	1.66101	1.67093	4.80071	2.56603	2.16238	2.18419	8546	11308	3034	10494	8345.5	monocyte
SRI	109552	0.0490497	0.498694	0.00172308	0.00109524	2.38032	1.66662	1.68015	1.80179	4.20652	2.1747	2.20462	2.48653	9277	12676	2918	8628	8374.75	monocyte
TNFAIP3	21929	0.771059	0.0379677	0.00531439	0.00420209	0.647382	0.296901	0.51136	0.40529	-1.76578	-4.37632	-2.35077	-3.08304	16364	7879	2621	6641	8376.25	microglia
SNX1	56440	0.0272549	0.504951	0.000269989	1.79213e-05	2.3416	1.494	1.94558	1.8625	4.06866	1.81668	2.85191	2.63638	9463	14489	1926	7961	8459.75	monocyte
CD47	16423	0.0147303	0.60806	0.000326982	0.000380442	2.5639	1.71198	1.67046	1.69272	4.91304	2.2761	2.18315	2.23265	8426	12281	2973	10192	8468	monocyte
DHRS1	52585	0.0174849	0.437726	0.00335717	0.00338329	2.17877	1.72963	1.69184	1.78902	3.52768	2.31643	2.23068	2.45581	10387	12131	2858	8813	8547.25	monocyte
RNF115	67845	0.0061484	0.664266	0.00159281	0.00191332	2.2612	1.65475	1.73817	1.74974	3.79391	2.14869	2.33612	2.36298	9913	12767	2656	9294	8657.5	monocyte
LPIN2	64898	0.0474066	0.0183705	0.000792743	0.000926897	0.556866	0.441477	0.484891	0.437595	-2.12283	-2.79334	-2.50325	-2.8221	14501	10673	2373	7258	8701.25	microglia
FOXP1	108655	0.0372968	0.0552488	0.000637937	0.000496345	2.21246	1.75458	1.64202	1.72648	3.63465	2.37429	2.12103	2.3092	10198	11940	3137	9655	8732.5	monocyte
NAA50	72117	0.0308496	0.432342	0.00357317	0.000477234	1.99772	1.52365	1.80075	1.97595	2.99368	1.87518	2.48402	2.93388	11566	14133	2409	7017	8781.25	monocyte
NSF	18195	0.029538	0.418073	0.0047442	0.00968235	2.18263	1.51037	1.73021	1.8534	3.53979	1.84884	2.31777	2.6135	10360	14296	2688	8037	8845.25	monocyte
D8ERTD738E	101966	0.0252904	0.738381	0.00435717	0.00347635	2.31294	1.70867	1.70093	1.64818	3.96894	2.2686	2.25111	2.13438	9623	12313	2827	10825	8897	monocyte
ZC3HAV1	78781	0.0304794	0.742793	0.000540508	0.00131177	2.46239	1.54015	1.65821	1.72066	4.5113	1.90824	2.15626	2.29587	8883	13954	3046	9728	8902.75	monocyte
BRWD1	93871	0.0223964	0.000234627		0.00424942	0.487405	0.311661		0.372864	-2.48805	-4.14704		-3.39074	13021	8126		5598	8915	microglia
MAP4K5	399510	0.922486	0.0357694	0.00174121	0.000172297	0.736849	0.319793	0.5284	0.398195	-1.5003	-4.0298	-2.26076	-3.14606	18149	8316	2803	6503	8942.75	microglia
CASP2	12366	0.0418493	0.763855	0.00668952	0.0076248	2.50623	1.47692	1.65274	1.67879	4.68133	1.78354	2.14431	2.20159	8661	14654	3088	10348	9187.75	monocyte
RAB32	67844	0.0424582	0.914631	0.0135906	0.0118278	2.2696	1.4479	1.64125	1.77314	3.8219	1.72811	2.11936	2.41797	9852	14995	3140	8995	9245.5	monocyte
CTNNA1	12385	0.0437198	0.918702	0.00174332	0.0016829	2.40445	1.44325	1.64685	1.71135	4.29433	1.71933	2.1315	2.27466	9159	15043	3114	9871	9296.75	monocyte
ZFP62	22720	0.333138	0.0241678	0.0125508	0.00298862	0.614749	0.380352	0.553397	0.498306	-1.88221	-3.315	-2.13887	-2.42392	15719	9517	3098	8956	9322.5	microglia
SDAD1	231452	0.0373865	0.875675	0.00128052	0.00133249	2.52274	1.50055	1.61003	1.63549	4.74674	1.8295	2.05258	2.10692	8596	14405	3344	11017	9340.5	monocyte
IRAK4	266632	0.0470951	0.706178	0.00403135	0.00397186	2.47817	1.51572	1.59208	1.63747	4.57192	1.85942	2.01483	2.1112	8801	14225	3460	10978	9366	monocyte
LTV1	353258	0.0418731	0.977489	0.00468593	0.00568018	2.06439	1.35103	1.79631	1.8608	3.18258	1.55094	2.47331	2.63209	11084	16101	2421	7992	9399.5	monocyte
GRINL1A	28015	0.0485461	0.776813	0.00516526	0.00792261	2.2587	1.5351	1.63396	1.66919	3.78562	1.89809	2.10363	2.18037	9933	14002	3181	10499	9403.75	monocyte
ACAT1	110446	0.0112494	0.721138	0.00593295	0.005418	2.29319	1.61079	1.61324	1.6139	3.9014	2.0542	2.05938	2.06078	9712	13211	3323	11479	9431.25	monocyte
FGD4	224014	0.0444065	0.583341	0.0018463	0.00376412	1.84307	1.73406	1.7527	1.65799	2.58774	2.32663	2.3699	2.15577	12732	12094	2582	10701	9527.25	monocyte
ATP10D	231287	0.0495578	0.531767	0.000503636	0.000720274	2.17502	1.51634	1.59171	1.59432	3.51593	1.86064	2.01405	2.01953	10417	14218	3461	11879	9993.75	monocyte
EPS15	13858	0.0224015	0.54738	0.00396	0.00406215	2.17364	1.38537	1.62308	1.65784	3.51159	1.61238	2.08031	2.15543	10427	15697	3258	10702	10021	monocyte
SEPHS1	109079	0.0418853	0.95723	0.00279947	0.00227357	2.09393	1.29138	1.65857	1.7185	3.26911	1.44763	2.15703	2.29094	10897	16955	3042	9790	10171	monocyte
AL807784		1	0.0410869	0.00343871	0.00880453	0	2.70095	2.37776	2.10812	0	5.50228	4.19728	3.31129	26961	6806	1177	6171	10278.8	monocyte
GM10199	100049552	1	6.72832e-25	0.0180809	0.00347684	0	0.145923	0.514989	0.46457	0	-9.39509	-2.3311	-2.63223	26246	4931	2663	7990	10457.5	microglia
1700049G17RIK	73430	0.0215517	0.00950997	0.00358908	0.231808	0.382738	0.275986	0.51561	0.713108	-3.29149	-4.74335	-2.32776	-1.56413	10859	7473	2668	20930	10482.5	microglia
SMCHD1	74355	0.028516	1.0067	0.000873076	0.000590093	1.95459	1.27703	1.678	1.68459	2.87606	1.42339	2.19984	2.21448	11842	17151	2925	10302	10555	monocyte
ENG	13805	0.0218101	1	0.00145344	0.000627316	0.147578	0	0.268448	0.235358	-9.28434	0	-4.88971	-5.64336	5695	32569	996	3490	10687.5	microglia
API5	11800	0.0291301	1.11106	0.00583742	0.00504166	2.09284	1.18559	1.709	1.66114	3.26586	1.27456	2.26935	2.16267	10903	18494	2787	10625	10702.2	monocyte
B4GALT5	56336	0.0260524	1	0.00148635	0.000707571	3.31703	0	2.12718	2.21445	8.96613	0	3.36863	3.64106	5834	32676	1527	5214	11312.8	monocyte
ADRBK2	320129	0.0379188	1.15018	0.012013	0.0175381	1.85842	1.15844	1.59378	1.67935	2.6261	1.23216	2.0184	2.20284	12609	18896	3452	10342	11324.8	monocyte
RAB36	76877	0.0478243	0.00121073	0.00605514	0.283084	6.35895	4.36628	1.8465	1.13438	81.0796	19.6244	2.59626	1.19524	1400	2987	2225	39024	11409	monocyte
EFHA2	78506	0.04253	0.011268	0.00164118	0.0988401	0.25161	0.15336	0.436493	0.83901	-5.24837	-8.91607	-2.83037	-1.26771	8063	5076	1947	35184	12567.5	microglia
LRP8	16975	0.0131822	1.481e-05	0.00152763	0.961717	5.54436	5.71666	1.68833	1.00686	45.6678	51.5878	2.22283	1.00953	2100	1522	2877	51213	14428	monocyte
